# Supplementary material for: Comparative genomics and evolutionary analyses of Sphaeropleales
Source: Front Plant Sci. 2025 Oct 16;16:1534646. doi: 10.3389/fpls.2025.1534646 (PMC12571836; doi:10.3389/fpls.2025.1534646)
Supplement: Supplementary Table 1 — The analysis of the transporters in the Sphaeropleales genomes based on the Transporter Classification Database. [file Table1.xlsx]

## Sheet: Table S1
Annotation (TCDB)	ID (TCDB)	M. neglectum	T. obliquus	C. zofingiensis	C. reinhardtii	Scenedesmus obliquus	Tetradesmus obliquus	Tetradesmus obliquus	Tetradesmus obliquus	Monoraphidium contortum	Monoraphidium minutum	R. subcapitata	Bracteacoccus aerius	Bracteacoccus engadinensis
						SAMC4339297	SAMC4339299	SAMC4339298	SAMC4339300	SAMC4339301	GCA_025201885.1	GCA_003203535.1	SAMC4339295	SAMC4339296
The Eukaryotic Nuclear Pore Complex (E-NPC) Family	1.I.1	209	219	251	348	201	212	225	190	183	177	223	185	175
The ATP-binding Cassette (ABC) Superfamily	3.A.1	136	127	99	104	149	145	248	135	121	116	109	108	124
The Pock Size-determining Protein (PSDP) Family	9.B.106	99	96	81	120	0	0	0	0	0	0	103	0	0
The Major Facilitator Superfamily (MFS)	2.A.1	96	111	86	65	134	132	168	112	94	108	91	68	68
The Mechanosensitive Calcium Channel (MCA) Family	1.A.87	83	105	65	107	151	133	139	116	76	88	62	83	62
The Chloroplast Envelope Protein Translocase (CEPT or Tic-Toc) Family	3.A.9	74	58	61	56	59	53	61	59	50	71	59	40	50
The Drug/Metabolite Transporter (DMT) Superfamily	2.A.7	60	58	61	69	76	78	87	81	54	60	61	64	55
The Endoplasmic Reticular Retrotranslocon (ER-RT) Family	3.A.16	55	65	64	73	88	83	92	85	69	66	59	65	67
The P-type ATPase (P-ATPase) Superfamily	3.A.3	52	38	34	27	43	45	48	44	27	29	28	41	34
The H<sup>+</sup> or Na<sup>+</sup>-translocating NADH Dehydrogenase (NDH) Family	3.D.1	51	46	51	63	45	43	58	47	42	45	57	53	42
The H<sup>+</sup>- or Na<sup>+</sup>-translocating F-type, V-type and A-type ATPase (F-ATPase) Superfamily	3.A.2	51	23	28	34	36	33	40	40	35	39	35	30	36
The Mitochondrial Carrier (MC) Family	2.A.29	50	55	49	43	54	54	54	50	44	50	42	44	48
The Plant Photosystem I Supercomplex (PSI) Family	5.B.4	47	30	34	33	12	18	18	18	21	22	36	8	15
The Peroxisomal Protein Importer (PPI) Family	3.A.20	45	53	60	64	57	59	61	58	31	45	51	25	44
The Voltage-gated Ion Channel (VIC) Superfamily	1.A.1	39	33	34	43	37	39	38	31	26	23	21	32	20
The Domain of Unknown Function 3339 (DUF3339) Family	9.A.61	38	49	63	59	3	3	3	3	3	3	44	1	0
The Basigin (Basigin) Family	8.A.23	37	25	26	69	96	100	97	99	68	117	43	66	95
The General Secretory Pathway (Sec) Family	3.A.5	35	33	25	26	31	31	35	23	34	27	31	26	24
The Nuclear mRNA Exporter (mRNA-E) Family	3.A.18	33	37	46	34	31	33	38	29	31	36	36	21	32
The Ankyrin (Ankyrin) Family	8.A.28	29	30	49	70	34	41	38	25	20	27	42	41	37
The Polyoma Virus SV40 ER Penitration Channel (VPEC) Family	1.P.1	23	26	36	46	14	18	27	23	18	19	30	14	14
The Transient Receptor Potential Ca<sup>2+</sup> Channel (TRP-CC) Family	1.A.4	22	21	19	53	43	44	48	29	23	22	21	24	30
The Fatty Acid Transporter (FAT) Family	4.C.1	22	17	17	12	25	30	52	34	30	27	19	30	26
The Retromer-dependent Vacuolar Protein Sorting (R-VPS) Family	9.A.63	21	20	28	26	8	9	2	6	8	6	25	6	4
The Anion Channel-forming Bestrophin (Bestrophin) Family	1.A.46	20	8	6	10	7	10	9	7	15	14	12	4	5
The Synaptosomal Vesicle Fusion Pore (SVF-Pore) Family	1.F.1	19	17	16	15	20	22	22	25	17	24	16	20	19
The Octameric Exocyst (Exocyst) Family	1.F.2	19	14	10	12	10	13	12	11	7	10	13	14	10
The Calcium-Dependent Chloride Channel (Ca-ClC) Family	1.A.17	19	11	15	16	13	14	13	12	10	11	13	10	8
The Bile Acid:Na<sup>+</sup> Symporter (BASS) Family	2.A.28	17	20	15	21	20	24	20	24	9	18	15	13	15
The Gap Junction-forming Innexin (Innexin) Family	1.A.25	17	19	24	19	12	16	11	19	4	4	13	12	12
The Amino Acid/Auxin Permease (AAAP) Family	2.A.18	15	30	13	7	30	33	34	42	14	17	19	11	19
The G-Protein Î±Î²Î³ Complex (GPC) Family	8.A.92	15	18	18	20	88	70	79	69	63	72	18	93	81
The Voltage-gated K<sup>+</sup> Channel &beta;-subunit (Kv&beta;) Family	8.A.5	15	15	24	17	20	19	26	20	14	15	15	22	25
The Calmodulin Calcium Binding Protein (Calmodulin) Family	8.A.82	15	13	14	30	21	22	20	19	8	13	11	19	13
The Ca<sup>2+</sup>:Cation Antiporter (CaCA) Family	2.A.19	15	6	8	7	8	6	8	6	9	6	10	8	9
The Bacterial (Planctomycetes) Nuclear Pore-like Complex (B-NPC) Family	1.I.3	14	28	14	6	16	19	18	10	7	7	15	2	3
The Multidrug/Oligosaccharidyl-lipid/Polysaccharide (MOP) Flippase Superfamily	2.A.66	14	17	19	17	21	17	26	16	16	15	13	16	18
The Klotho Auxiliary Protein (Klotho) Family	8.A.49	14	16	13	2	11	12	11	13	12	15	10	11	7
The Endomembrane protein-70 (EMP70) Family	8.A.68	14	10	6	5	9	8	9	9	8	9	8	12	8
The Mitochondrial Protein Translocase (MPT) Family	3.A.8	12	15	15	17	18	19	20	21	21	21	17	19	19
The Symbiont-specific ERAD-like Machinery (SELMA) Family	3.A.25	12	13	19	11	18	18	16	13	14	13	10	26	15
The Divalent Anion:Na<sup>+</sup> Symporter (DASS) Family	2.A.47	12	10	7	9	9	5	7	7	8	7	11	5	7
The Proton-translocating Quinol:Cytochrome c Reductase (QCR) Superfamily	3.D.3	12	7	14	10	10	11	14	13	7	12	9	11	9
The Intracellular Chloride Channel (CLIC) Family	1.A.12	12	7	10	4	11	13	15	17	4	9	7	8	11
The Sorting Nexin27 (SNX27)-Retromer Assembly Apparatus for Recycling Integral Membrane Proteins (SNX27-RetromerAA) Family	9.A.3	12	3	41	14	15	11	10	13	8	10	9	16	15
The Nedd4-Family Interacting Protein-2 (Nedd4) Family	8.A.30	11	18	15	16	11	10	11	10	8	8	12	6	8
The Small Nuclear RNA Exporter (snRNA-E)	9.A.60	11	9	13	12	13	12	13	16	12	17	14	13	12
The Plasmodium Translocon of Exported proteins (PTEX) Family	3.A.26	11	7	10	12	8	8	10	10	10	10	10	9	8
The Monovalent Cation:Proton Antiporter-1 (CPA1) Family	2.A.36	11	6	6	9	8	8	11	12	8	7	6	5	6
The Glycan Glucosyl Transferase (OpgH) Family	4.D.3	10	20	15	2	16	12	11	12	9	8	7	7	9
The Amino Acid-Polyamine-Organocation (APC) Family	2.A.3	10	17	11	8	15	15	21	17	7	10	7	6	8
The Mpv17/Pmp22 4 TMS Putative Porin (Mpv17) Family	9.B.192	10	13	9	11	0	0	0	0	0	0	11	0	0
The Zinc (Zn<sup>2+</sup>)-Iron (Fe<sup>2+</sup>) Permease (ZIP) Family	2.A.5	10	12	11	14	13	13	13	13	9	14	11	10	8
The Putative Tripartite Zn<sup>2+</sup> Transporter (TZT) Family	9.B.10	10	12	10	12	12	10	15	12	7	12	11	11	11
The NEAT-domain containing methaemoglobin heme sequestration (N-MHS) Family	8.A.43	10	11	23	13	17	19	17	24	14	12	9	23	34
The Ammonium Transporter Channel (Amt) Family	1.A.11	9	10	9	10	11	12	14	8	5	10	8	7	7
The Lysosomal Cystine Transporter (LCT) Family	2.A.43	9	9	4	3	9	8	8	7	5	7	6	8	9
The Huntington-interacting Protein 14 (HIP14) Family	9.B.37	9	8	7	11	0	0	0	0	0	0	9	0	0
The Chloride Carrier/Channel (ClC) Family	2.A.49	9	7	7	8	7	9	9	9	6	7	7	9	10
The Autophagy-related Phagophore-formation Transporter (APT) Family	9.A.15	9	6	11	24	43	32	32	38	34	34	8	85	35
The Proton-translocating Cytochrome Oxidase (COX) Superfamily	3.D.4	9	5	7	8	7	7	15	5	6	4	5	6	8
The Selenoprotein P Receptor (SelP-Receptor) Family	9.B.87	9	3	4	10	27	27	30	24	25	23	3	9	14
The Phagocyte (gp91<sup>phox</sup>) NADPH Oxidase Family	5.B.1	8	13	15	11	10	13	16	13	8	7	13	13	9
The Na<sup>+</sup>-transporting Carboxylic Acid Decarboxylase (NaT-DC) Family	3.B.1	8	10	8	8	12	11	18	12	6	10	9	7	11
The C-terminal Tail-Anchored Membrane Protein Biogenesis/ Insertion Complex (TAMP-B) Family	3.A.21	8	9	12	8	5	7	8	5	4	2	9	4	6
The Mixed Lineage Kinase Domain-like (MLKL) Family	1.A.105	8	9	8	16	4	6	5	8	7	7	5	3	3
The Colicin V Production (CvpA) Family	9.B.160	8	7	10	6	8	7	5	6	4	2	10	1	4
The CorA Metal Ion Transporter (MIT) Family	1.A.35	8	5	5	11	7	9	8	6		8	9	7	8
The Proton-dependent Oligopeptide Transporter (POT/PTR) Family	2.A.17	8	3	3	1	5	3	4	3	2	5	5	2	2
The H<sup>+</sup>, Na<sup>+</sup>-translocating Pyrophosphatase (M<sup>+</sup>-PPase) Family	3.A.10	8	1	2	1	2	2	3	2	1	1	1	2	2
The Major Intrinsic Protein (MIP) Family	1.A.8	7	14	9	3	12	14	14	9	6	8	5	6	6
The Telurite-resistance/Dicarboxylate Transporter (TDT) Family	2.A.16	7	10	10	6	10	9	7	8	5	4	7	7	5
The ATP:ADP Antiporter (AAA) Family	2.A.12	7	10	5	4	9	11	9	10	6	8	6	6	5
The Guanylate Cyclase (GC) Family	8.A.85	7	9	10	71	7	10	16	7	5	5	6	3	14
The DedA or YdjX-Z (DedA) Family	9.B.27	7	8	8	6	8	7	11	8	9	9	8	8	6
The TBC1 Domain (TBC1) Family	8.A.87	7	6	11	8	10	9	10	11	8	8	9	11	11
The HlyC/CorC (HCC) Family	9.A.40	7	6	4	5	0	0	0	0	0	0	5	0	0
The Formate-Nitrite Transporter (FNT) Family	1.A.16	7	6	2	6	7	6	6	4	4	5	5	3	3
The Glutamate-gated Ion Channel (GIC) Family of Neurotransmitter Receptors	1.A.10	7	5	7	6	17	14	15	19	12	12	16	9	13
The Polycystin Cation Channel (PCC) Family	1.A.5	6	11	6	17	10	9	8	6	5	5	5	16	14
The Sulfate Permease (SulP) Family	2.A.53	6	10	7	11	16	12	18	10	5	6	6	8	8
The Nucleobase/Ascorbate Transporter (NAT) or Nucleobase:Cation Symporter-2 (NCS2) Family	2.A.40	6	9	4	7	22	15	23	16	7	11	4	12	9
The calciquestrin (CASQ) Family	8.A.88	6	7	5	8	15	17	20	16	17	18	10	15	15
The 4-Toluene Sulfonate Uptake Permease (TSUP) Family	2.A.102	6	5	9	5	9	9	11	11	9	6	3	6	7
The Membrane Protein Insertase (YidC/Alb3/Oxa1) Family	2.A.9	6	5	5	3	4	3	6	3	4	4	4	5	5
The Iron/Lead Transporter (ILT) Family	2.A.108	6	5	2	3	6	5	8	7	2	3	2	5	4
The Extended-Synaptotagmin (E-Syt) Family	9.A.57	6	4	8	12	9	6	9	8	9	9	7	10	13
The Prokaryotic Succinate Dehydrogenase (SDH) Family	3.D.10	6	4	5	4	5	5	7	6	5	6	4	5	5
The Neurotransmitter Receptor, Cys loop, Ligand-gated Ion Channel (LIC) Family	1.A.9	6	3	1	6	9	7	14	5	5	12	5	11	9
The Small Conductance Mechanosensitive Ion Channel (MscS) Family	1.A.23	5	9	4	7	8	9	13	8	5	7	7	4	5
The Cation Channel-forming Heat Shock Protein-70 (Hsp70) Family	1.A.33	5	8	6	10	6	6	13	8	8	8	6	12	9
The Monovalent Cation:Proton Antiporter-2 (CPA2) Family	2.A.37	5	8	6	4	5	6	6	6	6	7	6	5	6
The Aromatic Acid Exporter (ArAE) Family	2.A.85	5	6	4	4	8	7	8	5	3	4	4	3	5
The Rhomboid Protease (Rhomboid) Family	9.B.104	5	5	9	11	6	6	8	7	7	7	7	6	5
The Multicomponent Putative SpoIIIAE Exporter (SpoIIIA-E) Family	9.B.70	5	5	2	6	4	4	3	3	3	4	3	3	3
The Triflin Toxin (Triflin or CRISP) Family	8.B.9	5	3	4	14	9	11	11	10	6	6	5	8	5
The Ca<sup>2+</sup>:H<sup>+</sup> Antiporter-2 (CaCA2) Family	2.A.106	5	3	4	4	3	4	4	5	5	5	5	3	3
The Autotransporter-1 (AT-1) Family	1.B.12	5	2	13	3	5	2	3	8	4	5	1	4	3
The Type IV (Conjugal DNA-Protein Transfer or VirB) Secretory Pathway (IVSP) Family	3.A.7	5	2	7	3	6	8	33	4	8	5	3	7	7
The Cation Diffusion Facilitator (CDF) Family	2.A.4	5	2	4	5	3	3	4	3	4	3	4	3	4
The Integral membrane Glycosyltransferase family 39 (GT39) Family	9.B.142	5	2	2	2	10	11	17	11	12	12	2	11	10
The Solute:Sodium Symporter (SSS) Family	2.A.21	4	10	2	9	7	6	13	6	5	5	6	2	6
The Equilibrative Nucleoside Transporter (ENT) Family	2.A.57	4	7	2	2	42	41	41	38	27	32	4	21	18
The Calcium Transporter A (CaTA) (formerly the Testis-Enhanced Gene Transfer (TEGT) Family	1.A.14	4	6	6	3	5	6	7	6	5	8	4	4	8
The Two Tunnel Gated C-terminal Processing Protease (CTP) Family	9.B.174	4	6	5	5	6	5	5	5	5	5	5	5	5
The Eukaryotic Cytochrome b<sub>561</sub> (Cytb<sub>561</sub>) Family	5.B.2	4	6	3	11	5	6	6	8	3	3	4	5	9
The Presenilin ER Ca<sup>2+</sup> Leak Channel (Presenilin) Family	1.A.54	4	5	4	4	4	3	3	4	4	4	4	4	5
The Oligopeptide Transporter (OPT) Family	2.A.67	4	5	4	0	6	5	7	9	5	5	6	1	1
The Membrane Trafficking Yip (Yip) Family	9.B.135	4	5	3	4	4	4	4	4	3	3	4	4	4
The PI4P/PS Counter Transporter (P/P-CT) Family	2.D.1	4	4	4	5	5	5	4	4	4	2	3	4	4
The Aspartate Amino Transferase (AAT) Family	9.A.70	4	4	4	3	4	4	5	3	4	3	3	4	4
The Mg<sup>2+</sup>/Ca<sup>2+</sup> Uniporter (MCU) Family	1.A.77	4	4	3	5	3	3	4	3	4	3	4	5	4
The Outer Membrane Protein Insertion Porin (Bam Complex) (OmpIP) Family	1.B.33	4	4	3	3	3	3	9	4	5	6	3	4	5
The Integral Membrane CAAX Protease-2 (CAAX Protease2) Family	9.B.2	4	3	5	5	6	5	4	5	6	4	6	5	6
The Metal Ion (Mn<sup>2+</sup>-iron) Transporter (Nramp) Family	2.A.55	4	3	4	4	4	4	4	4	3	3	3	3	3
The Lysosomal Cobalamin (B<sub>12</sub>) Transporter (L-B<sub>12</sub>T) Family	9.A.54	4	3	3	3	2	2	3	2	3	4	4	2	2
The M50 Peptidase (M50-P) Family	9.B.149	4	2	5	6	5	6	7	7	4	5	5	4	6
The Vacuolar (Acidocalcisome) Polyphosphate Polymerase (V-PPP) Family	4.E.1	4	2	4	3	4	7	6	2	3	5	4	4	7
The Lantibiotic Immunity Protein/Serine Connector (LIP/SIP) Family	9.A.29	4	2	2	2	2	2	2	2	2	2	2	2	2
The Syntaxin (Syntaxin) Family	8.A.91	4	1	3	4	5	5	5	4	6	3	4	4	3
The Sweet; PQ-loop; Saliva; MtN3 (Sweet) Family	2.A.123	3	7	5	4	10	9	10	8	2	6	3	4	3
The Stomatin/Podocin/Band 7/Nephrosis.2/SPFH (Stomatin) Family	8.A.21	3	6	7	6	7	9	10	8	8	8	7	10	10
The Immunophilin-like Prolyl:peptidyl Isomerase Regulator (I-PPI) Family	8.A.11	3	4	6	5	12	12	11	12	11	9	3	13	11
The YggT or Fanciful K<sup>+</sup> Uptake-B (FkuB; YggT) Family	9.A.4	3	4	3	4	4	4	5	4	5	4	4	4	4
The Inward Rectifier K<sup>+</sup> Channel (IRK-C) Family	1.A.2	3	4	3	3	3	3	3	3	2	2	2	2	2
The Twin Arginine Targeting (Tat) Family	2.A.64	3	4	3	3	3	3	7	3	3	3	3	3	3
The Mg<sup>2+</sup> Transporter-E (MgtE) Family	1.A.26	3	4	2	2	1	2	2	2	3	6	4	2	2
The Transcription-coupled TREX/TAP Nuclear mRNA Export Complex (TREX) Family	3.A.22	3	3	4	3	34	26	29	24	26	29	4	47	28
The Mitochondrial Cholesterol/Porphyrin Uptake Translocator Protein (TSPO) Family	9.A.24	3	3	4	2	4	4	5	5	2	4	4	4	4
The Phage Shock Protein (Psp) Family	9.B.100	3	3	2	2	2	2	2	2	2	3	2	2	2
The Organic Solute Transporter (OST) Family	2.A.82	3	3	2	2	2	2	2	2	2	3	1	3	3
The Uncharacterized DUF202/YidH (YidH) Family	9.B.51	3	3	1	3	2	0	1	4	2	1	2	3	1
The Choline/EthanolaminePhosphotransferase 1 (CEPT1) Family	4.F.1	3	2	4	5	4	4	8	4	4	4	4	4	4
The Acetate Uptake Transporter (AceTr) Family	2.A.96	3	2	3	5	2	2	2	2	1	2	3	3	2
The TMS Recognition/Insertion Complex (TRC) Family	3.A.19	3	2	3	4	3	3	3	3	1	2	3	4	2
The Ubiquitin-related Protein Degradation (UPD) Family	8.A.52	3	2	3	3	5	6	5	2	5	5	3	7	6
The Mitochondrial and Plastid Porin (MPP) Family	1.B.8	3	2	3	3	3	2	3	2	2	2	2	3	2
The Membrane Mg<sup>2+</sup> Transporter (MMgT) Family	1.A.67	3	2	2	3	3	4	4	4	5	4	2	5	5
The Endoplasmic Reticulum Retention Receptor (KDELR) Family	9.B.191	3	2	2	3	2	2	7	2	3	0	2	3	3
The Auxin Efflux Carrier (AEC) Family	2.A.69	3	2	2	2	5	5	8	5	2	3	0	3	3
The AAA-ATPase, Bcs1 (Bcs1) Family	9.A.62	3	2	2	2	0	0	0	0	0	0	2	0	0
The LrgB/CidB Holin-like Glycolate/Glycerate Transporter (LrgB/CidB/GGT) Family	2.A.122	3	2	1	1	2	2	3	2	1	3	1	2	2
The Ferrous Iron Uptake (FeoB) Family	9.A.8	3	1	4	5	2	3	5	3	3	4	5	2	2
The <i>Bacillus thuringiensis</i> Vegetative Insecticidal Protein-3 (Vip3) Family	1.C.105	3	1	3	4	3	4	2	6	0	5	2	2	4
The Putative Vectorial Glycosyl Polymerization (VGP) Family	4.D.1	3	1	3	1	7	7	10	5	1	8	0	8	6
The Mitochondrial Inner Membrane K<sup>+</sup>/H<sup>+</sup> and Ca<sup>2+</sup>/H<sup>+</sup> Exchanger (LetM1) Family	2.A.97	3	1	2	2	2	3	3	3	2	2	2	3	2
The Proton-translocating Transhydrogenase (PTH) Family	3.D.2	3	1	1	1	1	1	3	1	1	1	1	3	1
The K<sup>+</sup> Transporter (Trk) Family	2.A.38	3	1	1	1	1	1	3	1	1	1	0	2	1
The Tellurium Ion Resistance (TerC) Family	2.A.109	3	1	1	1	0	1	5	1	3	2	2	2	1
The Large Conductance Mechanosensitive Ion Channel (MscL) Family	1.A.22	3	1	0	0	1	1	3	1	2	2	2	0	0
The Inorganic Phosphate Transporter (PiT) Family	2.A.20	2	13	15	12	13	17	14	11	6	4	7	8	5
The Lead Resistance Fusion Protein (PbrBC) Family	9.B.105	2	3	5	2	4	3	4	3	1	2	3	4	4
The Hepatitis C Virus P7 Viroporin Cation-selective Channel (HCV-P7) Family	1.A.53	2	3	3	3	5	6	5	2	4	6	4	3	2
The Resistance-Nodulation-Cell Division (RND) Superfamily	2.A.6	2	3	1	3	3	2	15	4	3	3	1	2	4
The Sensitivity to Sodium or Salt Stress-induced Hydrophobic Peptide (Sna) Family	9.B.12	2	3	1	2	3	2	2	2	2	2	2	2	2
The Clostridial Cytotoxin (CCT) Family	1.C.57	2	3	1	1	0	2	4	3	2	0	3	1	2
The YedE/YeeE (YedE/YeeE) Family	9.B.102	2	2	4	4	4	4	10	4	4	3	4	3	4
The Choline Transporter-like (CTL) Family	2.A.92	2	2	4	3	2	2	2	3	2	3	3	4	2
The &#947;-Secretase (&#947;-Secretase) Family	9.B.47	2	2	2	3	0	0	0	0	0	0	2	0	0
The Putative Ca<sup>2+</sup> Uniporter (GC1qR) Family	9.B.103	2	2	2	2	2	2	2	2	2	2	2	2	2
The Peroxisomal Pore-forming Pex11 (Pex11) Family	1.A.101	2	2	2	2	2	1	2	2	2	2	2	2	2
The Glycosyl Transferase 2 (GT2) Family	4.D.2	2	2	2	2	0	3	3	0	1	0	2	2	1
The Copper Transporter (Ctr) Family	1.A.56	2	2	1	4	5	5	4	5	4	4	3	2	2
The Vacuolar Iron Transporter (VIT) Family	2.A.89	2	2	1	2	2	2	2	3	2	1	2	1	1
The Chloroplast Outer Membrane Porin (Oep23) Family	1.B.77	2	2	1	1	2	2	2	2	2	1	2	1	1
The Mitochondrial EF Hand Ca<sup>2+</sup> Uniporter Regulator (MICU) Family	8.A.44	2	2	1	1	1	0	1	2	2	0	1	1	2
The Integral Membrane Peroxisomal Protein Importer-2 (PPI2) Family	9.A.17	2	1	3	2	2	2	2	2	2	3	2	3	1
The Autoinducer-2 Exporter (AI-2E) Family (Formerly the PerM Family, TC #9.B.22)	2.A.86	2	1	2	2	3	3	4	2	4	4	2	3	3
The Pore-forming Amphipathic Helical Peptide HP(2-20) (HP2-20) Family	1.C.82	2	1	2	2	2	2	5	2	2	2	1	2	2
The Transmembrane Emp24 Domain-containing Protein (TMED) Family	9.B.188	2	1	1	2	3	3	2	3	4	4	1	2	3
The Meckel Syndrome Protein (Meckelin) Family	9.B.77	2	1	1	1	1	1	1	1	1	1	1	2	1
The Lysosomal 7-TMS (TM7SF1) Family	9.B.123	2	1	1	1	1	1	1	1	1	1	1	1	1
The Mildew Resistance Locus O (MLO) Family	9.B.197	2	1	0	3	0	0	0	0	0	0	3	0	0
The K<sup>+</sup> Uptake Permease (KUP) Family	2.A.72	2	0	5	5	2	2	2	3	1	0	1	3	3
The Nuclear t-RNA exporter (t-Exporter) Family	9.A.50	2	0	1	3	3	6	5	3	2	2	1	7	3
The Na<sup>+</sup>-translocating NADH:Quinone Dehydrogenase (Na-NDH or NQR) Family	3.D.5	2	0	1	2	1	0	1	1	0	4	0	1	0
The Mechanical Nociceptor, Piezo (Piezo) Family	1.A.75	2	0	1	1	1	0	0	2	1	1	1	2	1
The Type VII or ESX Protein Secretion System (T7SS) Family	3.A.24	2	0	0	2	2	2	3	2	2	1	0	1	2
The TM9 or Phg1 Targeting Receptor (Ppg1) Family	8.A.74	2	0	0	0	2	1	2	2	1	1	0	1	0
The Pore-forming RTX Toxin (RTX-toxin) Family	1.C.11	2	0	0	0	0	0	5	0	1	1	0	0	0
The Lactate Permease (LctP) Family	2.A.14	1	5	0	0	2	3	4	4	0	2	0	0	0
The Vitamin A Receptor/Transporter (STRA6) Family	2.A.90	1	3	2	4	3	3	3	3	3	3	3	3	3
The Epithelial Chloride Channel (E-ClC) Family	1.A.13	1	3	2	4	3	2	3	1	2	3	2	3	2
The Folate-Biopterin Transporter (FBT) Family	2.A.71	1	3	2	4	2	2	2	2	1	1	1	2	2
The Hly III (Hly III) Family	1.C.113	1	3	2	2	3	2	3	3	2	2	1	3	3
The Fatty Acid Exporter (FAX) Family	2.A.126	1	2	3	4	5	4	4	3	3	4	3	4	4
The MdmD Complementing Protein 1 (Mcp1) Family	9.B.178	1	2	2	2	2	2	2	2	2	2	2	2	2
The Ezrin/Radixin/Moesin-binding Phosphoprotein 50 (EBP50) Family	8.A.24	1	2	2	1	15	14	14	12	18	18	1	14	13
The Chloroplast Maltose Exporter (MEX) Family	2.A.84	1	2	2	1	2	2	2	2	1	2	1	1	2
The Plastid Outer Envelope Porin of 21 kDa (OEP21) Family	1.B.29	1	2	2	1	2	1	1	2	0	2	1	2	2
The Arsenite-Antimonite (ArsB) Efflux Family	2.A.45	1	2	2	1	1	1	1	2	2	2	3	2	1
The Î²-Amyloid Cleaving Enzyme (BACE1) Family	8.A.32	1	2	1	2	6	5	5	5	5	7	3	3	4
The Magnesium Transporter1 (MagT1) Family	1.A.76	1	2	1	2	2	2	2	2	1	3	2	2	2
The Amoebapore (Amoebapore) Family	1.C.35	1	2	1	2	1	1	1	1	1	1	1	1	1
The Ca<sup>2+</sup>-dependent Phospholipid Scramblase (Scramblase) Family	9.A.36	1	2	1	1	1	1	1	1	1	1	1	1	1
The Bacterial Hemolysin A (B-Hemolysin A) Family	1.C.109	1	2	1	1	1	1	1	1	1	1	1	1	1
The Peroxysomal Membrane Porin 4 (PxMP4) Family	1.B.69	1	2	1	1	1	1	1	1	1	1	1	1	1
The Type VI Symbiosis/Virulence Secretory Pathway (VISP) Family	3.A.23	1	2	0	2	15	16	27	11	16	11	1	31	13
The Regulator of ER Stress and Autophagy TMEM208 (TMEM208) Family	9.B.26	1	2	0	1	1	1	1	1	1	1	1	1	1
The NhaD Na<sup>+</sup>:H<sup>+</sup> Antiporter (NhaD) Family	2.A.62	1	2	0	1	1	1	1	1	1	1	1	1	0
The Alanine or Glycine:Cation Symporter (AGCS) Family	2.A.25	1	2	0	1	0	2	3	1	1	1	1	1	0
The Arsenical Resistance-3 (ACR3) Family	2.A.59	1	1	4	0	2	2	3	1	2	3	1	4	2
The Membrane Attack Complex/Perforin (MACPF) Family	1.C.39	1	1	2	27	3	3	5	2	4	1	1	5	6
The Putative Integral Membrane Steroid 5&#945;-reductase (S&#945;R) Family	9.B.115	1	1	2	5	8	7	7	9	8	7	2	11	11
The Ca<sup>2+</sup> Release-activated Ca<sup>2+</sup> (CRAC) Channel (CRAC-C) Family	1.A.52	1	1	2	3	2	1	1	1	1	1	1	0	0
The Mitochondrial Pyruvate Carrier (MPC) Family	2.A.105	1	1	2	2	2	2	3	2	2	1	2	2	2
The CDC50 P-type ATPase Lipid Flippase Subunit (CDC50) Family	8.A.27	1	1	2	2	1	0	0	1	1	1	1	1	1
The Bacterial Competence-related DNA Transformation Transporter (DNA-T) Family	3.A.11	1	1	2	1	2	1	13	2	2	2	2	2	1
The Myelin Proteolipid Protein (MPLP) Family	9.B.38	1	1	2	1	2	2	2	2	0	4	0	0	1
The Chromate Ion Transporter (CHR) Family	2.A.51	1	1	2	1	1	2	3	1	1	1	1	2	3
The Chloroplast Envelope/Cyanobacterial Membrane Protein (CemA) Family	9.B.73	1	1	2	1	1	1	1	2	2	1	0	1	1
The Integral Membrane CAAX Protease (CAAX Protease) Family	9.B.1	1	1	1	2	3	3	5	3	3	3	1	3	3
The 4 TMS PF05225 (PF0225) Family	9.B.199	1	1	1	2	2	2	2	2	2	2	2	2	2
The Os-9 Quality Control (ERAD) Protein (Os-9) Family	8.A.67	1	1	1	2	2	2	2	2	0	1	1	1	1
The Disulfide Bond Oxidoreductase D (DsbD) Family	5.A.1	1	1	1	2	1	1	2	2	1	1	1	1	1
The Acyl-CoA Thioesterase (AcoT) Family	4.C.3	1	1	1	1	10	10	11	12	10	11	1	5	8
The Glycerol Uptake (GUP) Family	2.A.50	1	1	1	1	3	3	4	4	4	5	1	4	4
The Putative Undecaprenyl-phosphate N-Acetylglucosaminyl Transferase (MurG) Family	9.B.146	1	1	1	1	2	1	2	1	1	1	1	1	2
The Anion Exchanger (AE) Family	2.A.31	1	1	1	1	2	1	1	1	0	1	1	1	1
The Plant/Algal/Chlorella Nitrate Transporter Accessory Protein	8.A.20	1	1	1	1	1	1	1	1	1	1	1	1	1
The Nucleobase:Cation Symporter-1 (NCS1) Family	2.A.39	1	1	1	1	1	2	2	1	1	1	1	0	0
The Tripartite ATP-independent Periplasmic Transporter (TRAP-T) Family	2.A.56	1	1	1	1	1	1	23	1	1	1	1	1	1
The Prenylated Rab Acceptor Protein 1 (PRA1) Family	9.A.49	1	1	1	1	1	1	1	1	1	2	1	2	1
The Hapless2 Male Gamete Fusion Factor (Fusexin) Family	1.N.3	1	1	1	1	1	1	1	1	1	1	1	2	1
The Putative Na-independent Organic Solute Carrier Protein (OSCP1) Family	9.B.68	1	1	1	1	1	1	1	1	1	1	1	1	1
The TMEM205 (TMEM205) Family	9.A.55	1	1	1	1	1	1	1	1	1	1	1	1	1
The Ferroportin (Fpn) Family	2.A.100	1	1	1	1	1	1	1	1	1	1	1	1	1
The Chloroplast Trigalactosyldiacylglycerol-4 Porin (TGD4) Family.	1.B.82	1	1	1	1	1	1	1	1	1	1	1	1	1
The Nucleotide-sensitive Anion-selective Channel, ICln (ICln) Family	1.A.47	1	1	1	1	1	1	1	1	1	1	1	1	1
The Golgi pH Regulator (GPHR) Family	1.A.38	1	1	1	1	1	1	1	1	1	1	1	1	1
The Non-selective Cation Channel-2 (NSCC2) Family	1.A.15	1	1	1	1	1	1	1	1	1	1	1	1	1
The TMEM199 (TMEM199) Family	9.B.206	1	1	1	1	1	1	1	1	1	0	1	1	1
The Sigma2 Receptor or TMEM97 (S2R) Family	8.A.93	1	1	1	1	1	1	1	1	1	0	1	1	1
The Calcium Load-activated Calcium Channel (CLAC) Family	1.A.106	1	1	1	1	1	1	1	0	1	1	1	1	1
The Tetratricopeptide Repeat (Tpr1) Family	8.A.13	1	1	1	1	0	1	1	1	1	1	1	1	1
The Putative Transglycosylase-associated Holin (T-A Hol) Family	1.E.43	1	1	1	1	0	0	0	0	0	0	1	0	0
The rBAT Transport Accessory Protein (rBAT) Family	8.A.9	1	1	1	0	6	5	5	5	0	1	2	1	0
The PTS Fructose-Mannitol (Fru) Family	4.A.2	1	1	1	0	1	1	1	1	1	2	0	0	0
The Transmembrane Epithelial Antigen Protien-3 Ferric Reductase (STEAP) Family	5.B.6	1	1	0	1	2	2	3	1	0	1	1	0	0
The Lipid-translocating Exporter (LTE) Family	9.A.26	1	1	0	1	2	1	1	2	0	0	1	2	2
The 4 TMS YbhQ (YbhQ) Family	9.B.15	1	1	0	1	2	1	1	1	1	1	1	0	1
The 6 TMS DUF1275/Pf06912 (DUF1275) Family	9.B.143	1	1	0	1	1	1	1	1	0	1	1	1	1
The Hantavirus Gc Envelope Fusion Glycoprotein (Gc-EFG) Family	1.G.20	1	0	3	0	3	2	3	0	2	1	0	1	2
The TMEM203 or PF14967 (TMEM203) Family	8.A.76	1	0	2	0	2	2	2	0	0	1	2	2	1
The VAMP-associated protein (VAP) Family	9.B.17	1	0	1	1	8	10	9	9	12	16	1	9	11
The H<sub>2</sub>:Heterodisulfide Oxidoreductase (HHO) Family	3.D.7	1	0	1	1	2	1	6	0	1	1	0	0	0
The Ice Nucleation Protein Secretion System (INP-SS) Family	9.B.133	1	0	1	1	1	1	3	0	0	2	0	0	1
The Camphor Resistance or Fluoride Exporter (Fluc) Family	1.A.43	1	0	1	1	1	1	1	1	1	2	1	1	1
The Endoplasmic Reticulum Retrieval Protein1 (Putative Heavy Metal Transporter) (Rer1) Family	9.B.82	1	0	1	1	1	1	1	1	1	1	1	1	1
The H<sup>+</sup>-translocating F<sub>420</sub>H<sub>2</sub> Dehydrogenase (F<sub>420</sub>H<sub>2</sub>DH) Family	3.D.9	1	0	1	1	1	0	1	1	0	1	1	0	2
The Reactive Oxygen Species Modulator 1 (Romo1) Family	9.B.181	1	0	1	1	0	0	0	0	0	0	1	0	0
The Thiol-activated Cholesterol-dependent Cytolysin (CDC) Family	1.C.12	1	0	1	0	1	1	1	1	1	1	1	1	1
The Tetraspanin (Tetraspanin) Family	8.A.40	1	0	1	0	1	1	1	1	0	0	0	1	1
The Phosphotransferase System Enzyme I (EI) Family	8.A.7	1	0	0	2	0	0	2	0	1	1	1	0	0
The Post-GPI Attachment Protein-3 (P-GAP3) Family	9.B.132	1	0	0	1	1	1	1	1	1	1	1	1	1
The Ezrin/Radixin/Moesin (Ezrin) Family	8.A.25	1	0	0	1	0	1	1	0	1	0	0	1	1
The 6 TMS Lysyl tRNA Synthetase (LysS) Family	9.B.111	1	0	0	0	7	5	7	7	6	6	0	5	6
The Arsenite-Antimonite (ArsAB) Efflux Family	3.A.4	1	0	0	0	1	1	2	1	1	0	1	1	2
The Na<sup>+</sup>- or H<sup>+</sup>-Pumping Formyl Methanofuran Dehydrogenase (FMF-DH) Family	3.D.8	1	0	0	0	1	1	0	1	0	0	1	0	0
The Autotransporter-2 (AT-2) Family	1.B.40	1	0	0	0	0	1	1	0	0	1	0	0	0
The Phage T7 Injectisome (T7 Injectisome) Family	3.A.17	1	0	0	0	0	0	1	0	0	1	0	0	1
The AIG1 Lipid Hydrolase (AIG1) Family	9.B.203	1	0	0	0	0	0	0	1	1	1	1	0	0
The Copper Resistance Putative Porin (CopB) Family	1.B.76	0	5	3	3	3	2	4	1	0	1	0	1	1
The Ryanodine-Inositol 1,4,5-triphosphate Receptor Ca<sup>2+</sup> Channel (RIR-CaC) Family	1.A.3	0	2	3	2	2	3	3	2	2	3	3	1	0
The Xanthan Glycosyl Transferase, GumD (GumD) Family	9.B.18	0	2	2	1	6	7	26	6	6	9	2	6	4
The Pentraxin (Pentraxin) Family	1.C.92	0	2	1	1	1	1	1	1	1	3	0	0	1
The Ion-translocating Microbial Rhodopsin (MR) Family	3.E.1	0	2	0	8	16	15	17	11	8	10	0	34	17
The Ethanol Utilization/Transport (Eut) Protein Family	9.B.75	0	2	0	1	3	2	2	1	0	0	0	0	0
The Hydroxy/Aromatic Amino Acid Permease (HAAAP) Family	2.A.42	0	2	0	1	1	1	1	1	1	1	1	1	0
The K<sup>+</sup> Channel Accessory Protein (KChAP) Family	8.A.15	0	1	3	1	2	2	2	1	1	2	1	2	2
The Sulfate Transporter (CysZ) Family	2.A.121	0	1	2	1	3	3	3	2	1	2	1	2	2
The Phosphate Permease (Pho1) Family	2.A.94	0	1	1	1	2	1	1	1	2	1	0	2	2
The ATP Exporter (ATP-E) Family	9.A.6	0	1	1	1	1	1	1	1	1	1	1	2	3
The Endoplasmic Reticulum-derived Vesicle Protein, Erv14 (Erv14) Family	8.A.61	0	1	1	1	1	1	1	1	1	1	1	1	1
The DUF502 or Cog2928 (DUF502) Family	9.B.150	0	1	1	1	1	1	1	1	1	1	0	1	1
The Cut Copper Homeostasis (Cut) Family	9.B.158	0	1	1	1	1	1	1	1	1	1	0	0	0
The Long Chain Fatty Acid Translocase (lcFAT) Family	9.B.39	0	1	1	1	1	1	1	1	0	0	0	1	1
The Putative Thyronine-Transporting Transthyretin (Transthyretin) Family	9.B.35	0	1	1	1	1	1	1	1	0	0	0	1	1
The Putative Bacterial Archaeal Holin (BAH) Family	9.B.185	0	1	1	1	1	1	1	0	1	1	1	1	1
The Frataxin (Frataxin) Family	9.B.21	0	1	1	1	0	1	1	1	1	1	1	1	1
The Mitochondrial Inner/Outer Membrane Fusion (MMF) Family	9.B.25	0	1	1	1	0	0	0	0	0	0	1	0	0
The Stress-inducible Transmembrane Protein (TMPIT1) Family	9.B.112	0	1	1	1	0	0	0	0	0	0	1	0	0
The ER to Golgi Transport Factor (ER/G-TF) Family	9.B.214	0	1	1	0	1	1	2	1	1	1	0	1	0
The Outer Membrane Receptor (OMR) Family	1.B.14	0	1	1	0	1	0	3	0	0	0	0	1	0
The Plastid Outer Envelope Porin of 16 kDa (OEP16) Family	1.B.30	0	1	1	0	0	0	0	1	0	0	1	0	0
The RegIII&#947; (RegIII&#947;) Family	1.C.111	0	1	0	3	4	3	3	1	0	0	0	0	0
The Î±-Latrotoxin (Latrotoxin) Family	1.C.63	0	1	0	2	4	0	5	2	7	0	0	3	6
The Pleurotolysin Pore-forming (Pleurotolysin) Family	1.C.97	0	1	0	1	0	0	0	0	0	0	0	0	0
The TonB-ExbB-ExbD/TolA-TolQ-TolR Outer Membrane Receptor Energizers and Stabilizers (TonB/TolA) Family	2.C.1	0	1	0	0	1	2	2	0	0	1	0	0	0
The Pore-Forming &#946;-Defensin (&#946;-Defensin) Family	1.C.85	0	1	0	0	0	1	1	1	0	0	0	0	0
The Glycan Synthase, Fks1 (Fks1) Family	9.B.119	0	0	3	7	0	1	1	0	0	0	1	0	0
The Dystrophin (Dystrophin) Family	8.A.66	0	0	2	2	3	3	3	2	2	2	0	0	0
The Putative Amino Acid Permease (PAAP) Family	2.A.120	0	0	1	2	0	0	0	0	0	2	0	0	1
The Bactericidal Permeability Increasing Protein (BPIP) Family	1.C.40	0	0	1	1	1	1	1	1	1	1	1	1	1
The Membrane-anchored Lipid-binding Protein (LAM) Family	9.B.198	0	0	1	1	1	1	1	1	1	0	0	2	2
The 4 TMS Multidrug Endosomal Transporter (MET) Family	2.A.74	0	0	1	1	0	1	1	0	0	1	1	0	0
The Dicarboxylate/Amino Acid:Cation (Na<sup>+</sup> or H<sup>+</sup>) Symporter (DAACS) Family	2.A.23	0	0	1	1	0	0	2	0	0	0	0	1	1
The Sea Anemone Peptide Toxin Class 2 (Kalicludine) Family	8.B.13	0	0	1	1	0	0	0	0	1	2	2	0	0
The MICOS Complex Component, Mic60 (Mic60) Family	9.B.216	0	0	1	0	1	1	1	0	0	2	2	1	1
The Enterobacterial Cardiolipin Transporter (CLT) Family	2.A.127	0	0	0	6	3	6	8	3	1	3	0	0	0
The Fungal Septal Pore (FSP) Family	1.Q.1	0	0	0	3	0	0	1	1	1	1	0	0	0
The G-protein-coupled receptor (GPCR) Family	9.A.14	0	0	0	1	2	2	4	2	5	4	0	4	5
The Homotrimeric Cation Channel (TRIC) Family	1.A.62	0	0	0	1	1	1	3	1	1	1	1	1	1
The TMEM106B (TMEM106B) Family	9.B.23	0	0	0	1	1	1	2	1	1	1	1	1	1
The Starch-binding Domain-containing Protein, Stbd1 (Stbd1) Family	9.B.207	0	0	0	1	1	1	1	0	2	5	3	0	0
The Unconventional Protein Secretion (UPS) System	9.A.48	0	0	0	1	1	0	0	0	0	0	0	0	1
The Dispanin (Dispanin) Family	8.A.58	0	0	0	1	0	0	0	0	0	0	0	1	1
The Endoplasmic Reticulum (ER)-Plasma Membrane (PM) Junctional Competence Regulator (TMEM110) Family	8.A.65	0	0	0	1	0	0	0	0	0	0	0	1	0
The Inclusion Membrane Protein (IncA) Family	9.B.159	0	0	0	1	0	0	0	0	0	0	0	0	0
The DUF389/PF04087 (DUF389) Family	9.B.145	0	0	0	1	0	0	0	0	0	0	0	0	0
The Sea Anemone Peptide Toxin, Class 1 (BgK) Family	8.B.14	0	0	0	1	0	0	0	0	0	0	0	0	0
The <i>Geobacter</i> Nanowire Electron Transfer (G-NET) Family	5.B.3	0	0	0	1	0	0	0	0	0	0	0	0	0
The Voltage-gated Proton Channel (VPC) Family	1.A.51	0	0	0	0	2	2	2	2	2	4	1	4	3
The Non ABC Multidrug Exporter (N-MDE) Family	9.A.1	0	0	0	0	1	1	0	0	2	0	1	1	1
The Integrin (Integrin) Family	8.A.54	0	0	0	0	1	1	1	2	1	0	1	0	1
The Putative Beta-Barrel Porin/Alpha Amylase or Phenol_MetA-deg (BBP/AA) Family	9.B.153	0	0	0	0	0	1	4	0	0	0	1	0	0
The PTS Glucose-Glucoside (Glc) Family	4.A.1	0	0	0	0	0	0	1	0	0	0	1	0	0
The Helicobacter Outer Membrane Porin (HOP) Family	1.B.27	0	0	0	0	0	0	0	0	0	0	3	0	0
The NhaC Na<sup>+</sup>:H<sup>+</sup> Antiporter (NhaC) Family	2.A.35	0	0	0	0	0	0	0	0	0	0	2	0	0
The CD20 Ca<sup>2+</sup> Channel (CD20) Family	1.A.37	0	0	0	0	0	0	0	0	0	0	1	0	0

## Sheet: Table S2
species	GO_ID	Gene	Count	DEFINITION	Ontology	Term	Percentage
SAMC4339295	GO:0015105	4_rna-gnl|OEZ86|Sobl_g03959.t1_R0,august_c_000000072513_split_00002-g6602.t1,august_c_000000072513_split_00001-g4602.t1	3	Enables the transfer of arsenite from one side of a membrane to the other.	MF	arsenite transmembrane transporter activity	0.0371425
SAMC4339296	GO:0015105	4_rna-gnl|OEZ86|Sobl_g16207.t1_R0	1	Enables the transfer of arsenite from one side of a membrane to the other.	MF	arsenite transmembrane transporter activity	0.0128766
SAMC4339297	GO:0015105	4_rna-gnl|OEZ86|Sobl_g03959.t1_R0,august_c_000000054871_split_00005-g4331.t1	2	Enables the transfer of arsenite from one side of a membrane to the other.	MF	arsenite transmembrane transporter activity	0.0204604
SAMC4339300	GO:0015105	august_c_000000028195_split_00001-g17598.t1,4_rna-gnl|OEZ86|Sobl_g03959.t1_R0	2	Enables the transfer of arsenite from one side of a membrane to the other.	MF	arsenite transmembrane transporter activity	0.0208572
SAMC4339298	GO:0015105	4_rna-gnl|OEZ86|Sobl_g03959.t1_R0,august_c_000000026750_split_00001-g4691.t1	2	Enables the transfer of arsenite from one side of a membrane to the other.	MF	arsenite transmembrane transporter activity	0.0152172
SAMC4339301	GO:0015105	4_rna-gnl|OEZ86|Sobl_g16207.t1_R0	1	Enables the transfer of arsenite from one side of a membrane to the other.	MF	arsenite transmembrane transporter activity	0.0131839
GCA_000611645.1	GO:0015105	KIZ02603.1_GCA_000611645,KIZ02604.1_GCA_000611645,KIZ07797.1_GCA_000611645	3	Enables the transfer of arsenite from one side of a membrane to the other.	MF	arsenite transmembrane transporter activity	0.0462963
GCA_003203535.1	GO:0015105	GBF88485.1_GCA_003203535,GBF94835.1_GCA_003203535	2	Enables the transfer of arsenite from one side of a membrane to the other.	MF	arsenite transmembrane transporter activity	0.0303352
GCA_014905635.1	GO:0015105	KAF8062069.1_GCA_014905635	1	Enables the transfer of arsenite from one side of a membrane to the other.	MF	arsenite transmembrane transporter activity	0.0172622
GCA_025201885.1	GO:0015105	KAI8465106.1_GCA_025201885,KAI8464268.1_GCA_025201885	2	Enables the transfer of arsenite from one side of a membrane to the other.	MF	arsenite transmembrane transporter activity	0.0287894
GCA_030272055.1	GO:0015105	WIA17883.1_GCA_030272055,WIA19195.1_GCA_030272055	2	Enables the transfer of arsenite from one side of a membrane to the other.	MF	arsenite transmembrane transporter activity	0.0229148
GCA_030272155.1	GO:0015105	WIA39472.1_GCA_030272155,WIA38186.1_GCA_030272155	2	Enables the transfer of arsenite from one side of a membrane to the other.	MF	arsenite transmembrane transporter activity	0.0221582
SAMC4339295	GO:0015700	4_rna-gnl|OEZ86|Sobl_g03959.t1_R0,august_c_000000072513_split_00002-g6602.t1,august_c_000000072513_split_00001-g4602.t1	3	The directed movement of arsenite into, out of or within a cell, or between cells, by means of some agent such as a transporter or pore.	BP	arsenite transport	0.0596659
SAMC4339296	GO:0015700	4_rna-gnl|OEZ86|Sobl_g16207.t1_R0	1	The directed movement of arsenite into, out of or within a cell, or between cells, by means of some agent such as a transporter or pore.	BP	arsenite transport	0.0208551
SAMC4339297	GO:0015700	4_rna-gnl|OEZ86|Sobl_g03959.t1_R0,august_c_000000054871_split_00005-g4331.t1	2	The directed movement of arsenite into, out of or within a cell, or between cells, by means of some agent such as a transporter or pore.	BP	arsenite transport	0.0870474
SAMC4339300	GO:0015700	august_c_000000028195_split_00001-g17598.t1,4_rna-gnl|OEZ86|Sobl_g03959.t1_R0	2	The directed movement of arsenite into, out of or within a cell, or between cells, by means of some agent such as a transporter or pore.	BP	arsenite transport	0.0337781
SAMC4339298	GO:0015700	4_rna-gnl|OEZ86|Sobl_g03959.t1_R0,august_c_000000026750_split_00001-g4691.t1	2	The directed movement of arsenite into, out of or within a cell, or between cells, by means of some agent such as a transporter or pore.	BP	arsenite transport	0.0263852
SAMC4339301	GO:0015700	4_rna-gnl|OEZ86|Sobl_g16207.t1_R0	1	The directed movement of arsenite into, out of or within a cell, or between cells, by means of some agent such as a transporter or pore.	BP	arsenite transport	0.0208507
GCA_000611645.1	GO:0015700	KIZ02603.1_GCA_000611645,KIZ02604.1_GCA_000611645,KIZ07797.1_GCA_000611645	3	The directed movement of arsenite into, out of or within a cell, or between cells, by means of some agent such as a transporter or pore.	BP	arsenite transport	0.100604
GCA_003203535.1	GO:0015700	GBF88485.1_GCA_003203535,GBF94835.1_GCA_003203535	2	The directed movement of arsenite into, out of or within a cell, or between cells, by means of some agent such as a transporter or pore.	BP	arsenite transport	0.0674309
GCA_014905635.1	GO:0015700	KAF8062069.1_GCA_014905635	1	The directed movement of arsenite into, out of or within a cell, or between cells, by means of some agent such as a transporter or pore.	BP	arsenite transport	0.0369549
GCA_025201885.1	GO:0015700	KAI8465106.1_GCA_025201885,KAI8464268.1_GCA_025201885	2	The directed movement of arsenite into, out of or within a cell, or between cells, by means of some agent such as a transporter or pore.	BP	arsenite transport	0.0635728
GCA_030272055.1	GO:0015700	WIA17883.1_GCA_030272055,WIA19195.1_GCA_030272055	2	The directed movement of arsenite into, out of or within a cell, or between cells, by means of some agent such as a transporter or pore.	BP	arsenite transport	0.0522603
GCA_030272155.1	GO:0015700	WIA39472.1_GCA_030272155,WIA38186.1_GCA_030272155	2	The directed movement of arsenite into, out of or within a cell, or between cells, by means of some agent such as a transporter or pore.	BP	arsenite transport	0.0504923
SAMC4339295	GO:0015109	2_rna-gnl|WGS:LSYV|mrna.GPECTOR_108g189_R1,3_rna-gnl|WGS:JASKMD|H.pluvialis_05568_R0	2	Enables the transfer of chromate from one side of a membrane to the other. Chromate is the anion of chromic acid, H2CrO4 (aq) or CrO3.	MF	chromate transmembrane transporter activity	0.0247617
SAMC4339296	GO:0015109	august_c_000000027634_split_00003-g2380.t1,3_rna-gnl|WGS:JASKMD|H.pluvialis_05568_R0,august_c_000000027634_split_00004-g1624.t1	3	Enables the transfer of chromate from one side of a membrane to the other. Chromate is the anion of chromic acid, H2CrO4 (aq) or CrO3.	MF	chromate transmembrane transporter activity	0.0386299
SAMC4339297	GO:0015109	august_c_000000054871_split_00004-g6646.t1	1	Enables the transfer of chromate from one side of a membrane to the other. Chromate is the anion of chromic acid, H2CrO4 (aq) or CrO3.	MF	chromate transmembrane transporter activity	0.0102302
SAMC4339300	GO:0015109	3_rna-gnl|WGS:JASKMD|H.pluvialis_05568_R0	1	Enables the transfer of chromate from one side of a membrane to the other. Chromate is the anion of chromic acid, H2CrO4 (aq) or CrO3.	MF	chromate transmembrane transporter activity	0.0104286
SAMC4339298	GO:0015109	august_c_000000031991_split_00009-g6793.t1,august_c_000000017500_split_00032-g12127.t1,3_rna-gnl|WGS:JASKMD|H.pluvialis_05568_R0,august_c_000000017500_split_00018-g8947.t1	4	Enables the transfer of chromate from one side of a membrane to the other. Chromate is the anion of chromic acid, H2CrO4 (aq) or CrO3.	MF	chromate transmembrane transporter activity	0.0304345
SAMC4339299	GO:0015109	august_c_000000051450_split_00002-g4892.t1,august_c_000000051450_split_00001-g10838.t1	2	Enables the transfer of chromate from one side of a membrane to the other. Chromate is the anion of chromic acid, H2CrO4 (aq) or CrO3.	MF	chromate transmembrane transporter activity	0.0205128
SAMC4339301	GO:0015109	august_c_000000001765_split_00002-g130.t1	1	Enables the transfer of chromate from one side of a membrane to the other. Chromate is the anion of chromic acid, H2CrO4 (aq) or CrO3.	MF	chromate transmembrane transporter activity	0.0131839
GCA_000611645.1	GO:0015109	KIZ00622.1_GCA_000611645	1	Enables the transfer of chromate from one side of a membrane to the other. Chromate is the anion of chromic acid, H2CrO4 (aq) or CrO3.	MF	chromate transmembrane transporter activity	0.0154321
GCA_003203535.1	GO:0015109	GBF94520.1_GCA_003203535	1	Enables the transfer of chromate from one side of a membrane to the other. Chromate is the anion of chromic acid, H2CrO4 (aq) or CrO3.	MF	chromate transmembrane transporter activity	0.0151676
GCA_014080715.1	GO:0015109	KAF6265028.1_GCA_014080715	1	Enables the transfer of chromate from one side of a membrane to the other. Chromate is the anion of chromic acid, H2CrO4 (aq) or CrO3.	MF	chromate transmembrane transporter activity	0.0145539
GCA_014905635.1	GO:0015109	KAF8062073.1_GCA_014905635	1	Enables the transfer of chromate from one side of a membrane to the other. Chromate is the anion of chromic acid, H2CrO4 (aq) or CrO3.	MF	chromate transmembrane transporter activity	0.0172622
GCA_025201885.1	GO:0015109	KAI8469666.1_GCA_025201885	1	Enables the transfer of chromate from one side of a membrane to the other. Chromate is the anion of chromic acid, H2CrO4 (aq) or CrO3.	MF	chromate transmembrane transporter activity	0.0143947
GCA_030272055.1	GO:0015109	WIA17886.1_GCA_030272055	1	Enables the transfer of chromate from one side of a membrane to the other. Chromate is the anion of chromic acid, H2CrO4 (aq) or CrO3.	MF	chromate transmembrane transporter activity	0.0114574
GCA_030272155.1	GO:0015109	WIA38189.1_GCA_030272155	1	Enables the transfer of chromate from one side of a membrane to the other. Chromate is the anion of chromic acid, H2CrO4 (aq) or CrO3.	MF	chromate transmembrane transporter activity	0.0110791
SAMC4339295	GO:0015703	2_rna-gnl|WGS:LSYV|mrna.GPECTOR_108g189_R1,3_rna-gnl|WGS:JASKMD|H.pluvialis_05568_R0	2	The directed movement of chromate into, out of or within a cell, or between cells, by means of some agent such as a transporter or pore.	BP	chromate transport	0.0397772
SAMC4339296	GO:0015703	august_c_000000027634_split_00003-g2380.t1,3_rna-gnl|WGS:JASKMD|H.pluvialis_05568_R0,august_c_000000027634_split_00004-g1624.t1	3	The directed movement of chromate into, out of or within a cell, or between cells, by means of some agent such as a transporter or pore.	BP	chromate transport	0.0625652
SAMC4339297	GO:0015703	august_c_000000054871_split_00004-g6646.t1	1	The directed movement of chromate into, out of or within a cell, or between cells, by means of some agent such as a transporter or pore.	BP	chromate transport	0.0348189
SAMC4339300	GO:0015703	3_rna-gnl|WGS:JASKMD|H.pluvialis_05568_R0	1	The directed movement of chromate into, out of or within a cell, or between cells, by means of some agent such as a transporter or pore.	BP	chromate transport	0.016889
SAMC4339298	GO:0015703	august_c_000000031991_split_00009-g6793.t1,august_c_000000017500_split_00032-g12127.t1,3_rna-gnl|WGS:JASKMD|H.pluvialis_05568_R0,august_c_000000017500_split_00018-g8947.t1	4	The directed movement of chromate into, out of or within a cell, or between cells, by means of some agent such as a transporter or pore.	BP	chromate transport	0.0527704
SAMC4339299	GO:0015703	august_c_000000051450_split_00002-g4892.t1,august_c_000000051450_split_00001-g10838.t1	2	The directed movement of chromate into, out of or within a cell, or between cells, by means of some agent such as a transporter or pore.	BP	chromate transport	0.0348736
SAMC4339301	GO:0015703	august_c_000000001765_split_00002-g130.t1	1	The directed movement of chromate into, out of or within a cell, or between cells, by means of some agent such as a transporter or pore.	BP	chromate transport	0.0208507
GCA_000611645.1	GO:0015703	KIZ00622.1_GCA_000611645	1	The directed movement of chromate into, out of or within a cell, or between cells, by means of some agent such as a transporter or pore.	BP	chromate transport	0.0335345
GCA_003203535.1	GO:0015703	GBF94520.1_GCA_003203535	1	The directed movement of chromate into, out of or within a cell, or between cells, by means of some agent such as a transporter or pore.	BP	chromate transport	0.0337154
GCA_014080715.1	GO:0015703	KAF6265028.1_GCA_014080715	1	The directed movement of chromate into, out of or within a cell, or between cells, by means of some agent such as a transporter or pore.	BP	chromate transport	0.0334672
GCA_014905635.1	GO:0015703	KAF8062073.1_GCA_014905635	1	The directed movement of chromate into, out of or within a cell, or between cells, by means of some agent such as a transporter or pore.	BP	chromate transport	0.0369549
GCA_025201885.1	GO:0015703	KAI8469666.1_GCA_025201885	1	The directed movement of chromate into, out of or within a cell, or between cells, by means of some agent such as a transporter or pore.	BP	chromate transport	0.0317864
GCA_030272055.1	GO:0015703	WIA17886.1_GCA_030272055	1	The directed movement of chromate into, out of or within a cell, or between cells, by means of some agent such as a transporter or pore.	BP	chromate transport	0.0261301
GCA_030272155.1	GO:0015703	WIA38189.1_GCA_030272155	1	The directed movement of chromate into, out of or within a cell, or between cells, by means of some agent such as a transporter or pore.	BP	chromate transport	0.0252461
SAMC4339295	GO:0042910	4_rna-gnl|OEZ86|Sobl_g07893.t1_R3,4_rna-gnl|OEZ86|Sobl_g12800.t1_R0,4_rna-gnl|OEZ86|Sobl_g14600.t1_R0,2_rna-gnl|WGS:LSYV|mrna.GPECTOR_7g1065_R0,august_c_000000068353_split_00002-g7894.t1,4_rna-gnl|OEZ86|Sobl_g04910.t1_R0,4_rna-gnl|OEZ86|Sobl_g00537.t1_R0,august_c_000000037687_split_00001-g3169.t1,4_rna-gnl|OEZ86|Sobl_g16326.t2_R0,2_rna-gnl|WGS:LSYV|mrna.GPECTOR_56g446_R4,august_c_000000180772_spl…	13	Enables the directed movement of a xenobiotic from one side of a membrane to the other. A xenobiotic is a compound foreign to the organim exposed to it. It may be synthesized by another organism (like ampicilin) or it can be a synthetic chemical.	MF	xenobiotic transmembrane transporter activity	0.160951
SAMC4339296	GO:0042910	4_rna-gnl|OEZ86|Sobl_g00537.t1_R1,4_rna-gnl|OEZ86|Sobl_g12800.t2_R0,2_rna-gnl|WGS:LSYV|mrna.GPECTOR_34g723_R1,4_rna-gnl|OEZ86|Sobl_g07893.t1_R2,4_rna-gnl|OEZ86|Sobl_g07893.t1_R1,4_rna-gnl|OEZ86|Sobl_g16326.t1_R0,4_rna-gnl|OEZ86|Sobl_g14600.t1_R0,4_rna-gnl|OEZ86|Sobl_g16326.t2_R1,4_rna-gnl|OEZ86|Sobl_g04910.t1_R0,august_c_000000024356_split_00001-g152.t1,4_rna-gnl|OEZ86|Sobl_g15960.t1_R0,august_c_…	14	Enables the directed movement of a xenobiotic from one side of a membrane to the other. A xenobiotic is a compound foreign to the organim exposed to it. It may be synthesized by another organism (like ampicilin) or it can be a synthetic chemical.	MF	xenobiotic transmembrane transporter activity	0.180273
SAMC4339297	GO:0042910	4_rna-gnl|OEZ86|Sobl_g07893.t1_R0,4_rna-gnl|OEZ86|Sobl_g00537.t1_R0,4_rna-gnl|OEZ86|Sobl_g24438.t1_R0,1_rna-VOLCADRAFT_80710_R1,august_c_000000071007_split_00002-g963.t1,august_c_000000070881_split_00001-g18331.t1,4_rna-gnl|OEZ86|Sobl_g22605.t1_R0,august_c_000000028474_split_00001-g15531.t1,4_rna-gnl|OEZ86|Sobl_g12811.t1_R0,4_rna-gnl|OEZ86|Sobl_g22770.t1_R1,august_c_000000050218_split_00001-g1130…	16	Enables the directed movement of a xenobiotic from one side of a membrane to the other. A xenobiotic is a compound foreign to the organim exposed to it. It may be synthesized by another organism (like ampicilin) or it can be a synthetic chemical.	MF	xenobiotic transmembrane transporter activity	0.163683
SAMC4339300	GO:0042910	4_rna-gnl|OEZ86|Sobl_g24438.t1_R0,4_rna-gnl|OEZ86|Sobl_g16326.t2_R0,4_rna-gnl|OEZ86|Sobl_g12811.t1_R0,1_rna-VOLCADRAFT_80710_R0,august_c_000000055478_split_00002-g6919.t1,august_c_000000004067_split_00001-g13950.t1,august_c_000000048663_split_00001-g7859.t1,august_c_000000015877_split_00001-g4345.t1,4_rna-gnl|OEZ86|Sobl_g07893.t2_R0,4_rna-gnl|OEZ86|Sobl_g14600.t1_R0,4_rna-gnl|OEZ86|Sobl_g26932.t1…	14	Enables the directed movement of a xenobiotic from one side of a membrane to the other. A xenobiotic is a compound foreign to the organim exposed to it. It may be synthesized by another organism (like ampicilin) or it can be a synthetic chemical.	MF	xenobiotic transmembrane transporter activity	0.146001
SAMC4339298	GO:0042910	4_rna-gnl|OEZ86|Sobl_g07893.t1_R0,4_rna-gnl|OEZ86|Sobl_g00537.t1_R0,4_rna-gnl|OEZ86|Sobl_g16326.t2_R0,4_rna-gnl|OEZ86|Sobl_g12800.t2_R0,4_rna-gnl|OEZ86|Sobl_g24438.t1_R0,4_rna-gnl|OEZ86|Sobl_g00537.t1_R1,1_rna-VOLCADRAFT_80710_R1,august_c_000000003348_split_00002-g15486.t1,august_c_000000015542_split_00001-g2937.t1,august_c_000000017500_split_00016-g1363.t1,4_rna-gnl|OEZ86|Sobl_g14600.t1_R0,4_rna…	20	Enables the directed movement of a xenobiotic from one side of a membrane to the other. A xenobiotic is a compound foreign to the organim exposed to it. It may be synthesized by another organism (like ampicilin) or it can be a synthetic chemical.	MF	xenobiotic transmembrane transporter activity	0.152172
SAMC4339299	GO:0042910	4_rna-gnl|OEZ86|Sobl_g16326.t2_R0,4_rna-gnl|OEZ86|Sobl_g00537.t1_R1,4_rna-gnl|OEZ86|Sobl_g12800.t2_R0,1_rna-VOLCADRAFT_80710_R1,4_rna-gnl|OEZ86|Sobl_g22770.t1_R1,4_rna-gnl|OEZ86|Sobl_g15960.t1_R0,august_c_000000031940_split_00002-g5463.t1,4_rna-gnl|OEZ86|Sobl_g04910.t1_R0,august_c_000000037431_split_00002-g9604.t1,4_rna-gnl|OEZ86|Sobl_g12811.t1_R0,august_c_000000037785_split_00001-g17774.t1,augus…	15	Enables the directed movement of a xenobiotic from one side of a membrane to the other. A xenobiotic is a compound foreign to the organim exposed to it. It may be synthesized by another organism (like ampicilin) or it can be a synthetic chemical.	MF	xenobiotic transmembrane transporter activity	0.153846
SAMC4339301	GO:0042910	2_rna-gnl|WGS:LSYV|mrna.GPECTOR_56g446_R0,2_rna-gnl|WGS:LSYV|mrna.GPECTOR_34g723_R0,august_c_000000003583_split_00001-g1105.t1,4_rna-gnl|OEZ86|Sobl_g16326.t1_R0,august_c_000000021132_split_00003-g10647.t1,4_rna-gnl|OEZ86|Sobl_g14605.t1_R0,4_rna-gnl|OEZ86|Sobl_g15960.t1_R0,4_rna-gnl|OEZ86|Sobl_g07893.t2_R1,4_rna-gnl|OEZ86|Sobl_g04910.t1_R0,2_rna-gnl|WGS:LSYV|mrna.GPECTOR_228g509_R0	10	Enables the directed movement of a xenobiotic from one side of a membrane to the other. A xenobiotic is a compound foreign to the organim exposed to it. It may be synthesized by another organism (like ampicilin) or it can be a synthetic chemical.	MF	xenobiotic transmembrane transporter activity	0.131839
GCA_000611645.1	GO:0042910	KIY96977.1_GCA_000611645,KIY97951.1_GCA_000611645,KIY99568.1_GCA_000611645,KIZ02356.1_GCA_000611645,KIZ05364.1_GCA_000611645,KIZ05365.1_GCA_000611645,KIZ06354.1_GCA_000611645,KIZ07408.1_GCA_000611645,KIZ07409.1_GCA_000611645,KIZ07437.1_GCA_000611645	10	Enables the directed movement of a xenobiotic from one side of a membrane to the other. A xenobiotic is a compound foreign to the organim exposed to it. It may be synthesized by another organism (like ampicilin) or it can be a synthetic chemical.	MF	xenobiotic transmembrane transporter activity	0.154321
GCA_003203535.1	GO:0042910	GBF88424.1_GCA_003203535,GBF89389.1_GCA_003203535,GBF92463.1_GCA_003203535,GBF93861.1_GCA_003203535,GBF97494.1_GCA_003203535,GBF98590.1_GCA_003203535,GBF99158.1_GCA_003203535,GBG00152.1_GCA_003203535,GBG00233.1_GCA_003203535,GBG00591.1_GCA_003203535	10	Enables the directed movement of a xenobiotic from one side of a membrane to the other. A xenobiotic is a compound foreign to the organim exposed to it. It may be synthesized by another organism (like ampicilin) or it can be a synthetic chemical.	MF	xenobiotic transmembrane transporter activity	0.151676
GCA_014080715.1	GO:0042910	KAF6265722.1_GCA_014080715,KAF6264495.1_GCA_014080715,KAF6264262.1_GCA_014080715,KAF6261926.1_GCA_014080715,KAF6260291.1_GCA_014080715,KAF6260289.1_GCA_014080715,KAF6260271.1_GCA_014080715,KAF6259313.1_GCA_014080715,KAF6259041.1_GCA_014080715,KAF6257730.1_GCA_014080715,KAF6257725.1_GCA_014080715,KAF6253478.1_GCA_014080715,KAF6252887.1_GCA_014080715,KAF6252626.1_GCA_014080715	14	Enables the directed movement of a xenobiotic from one side of a membrane to the other. A xenobiotic is a compound foreign to the organim exposed to it. It may be synthesized by another organism (like ampicilin) or it can be a synthetic chemical.	MF	xenobiotic transmembrane transporter activity	0.203755
GCA_014905635.1	GO:0042910	KAF8072612.1_GCA_014905635,KAF8069710.1_GCA_014905635,KAF8069389.1_GCA_014905635,KAF8067152.1_GCA_014905635,KAF8063707.1_GCA_014905635,KAF8062039.1_GCA_014905635,KAF8061355.1_GCA_014905635,KAF8061080.1_GCA_014905635,KAF8060575.1_GCA_014905635,KAF8060322.1_GCA_014905635,KAF8059751.1_GCA_014905635,KAF8059746.1_GCA_014905635	12	Enables the directed movement of a xenobiotic from one side of a membrane to the other. A xenobiotic is a compound foreign to the organim exposed to it. It may be synthesized by another organism (like ampicilin) or it can be a synthetic chemical.	MF	xenobiotic transmembrane transporter activity	0.207147
GCA_025201885.1	GO:0042910	KAI8474936.1_GCA_025201885,KAI8474501.1_GCA_025201885,KAI8471347.1_GCA_025201885,KAI8470867.1_GCA_025201885,KAI8470091.1_GCA_025201885,KAI8469991.1_GCA_025201885,KAI8469493.1_GCA_025201885,KAI8469315.1_GCA_025201885,KAI8468384.1_GCA_025201885,KAI8466628.1_GCA_025201885	10	Enables the directed movement of a xenobiotic from one side of a membrane to the other. A xenobiotic is a compound foreign to the organim exposed to it. It may be synthesized by another organism (like ampicilin) or it can be a synthetic chemical.	MF	xenobiotic transmembrane transporter activity	0.143947
GCA_030272055.1	GO:0042910	WIA08509.1_GCA_030272055,WIA08864.1_GCA_030272055,WIA12589.1_GCA_030272055,WIA14524.1_GCA_030272055,WIA15192.1_GCA_030272055,WIA15364.1_GCA_030272055,WIA16259.1_GCA_030272055,WIA18025.1_GCA_030272055,WIA21753.1_GCA_030272055,WIA21758.1_GCA_030272055,WIA23433.1_GCA_030272055,WIA23934.1_GCA_030272055,WIA23951.1_GCA_030272055	13	Enables the directed movement of a xenobiotic from one side of a membrane to the other. A xenobiotic is a compound foreign to the organim exposed to it. It may be synthesized by another organism (like ampicilin) or it can be a synthetic chemical.	MF	xenobiotic transmembrane transporter activity	0.148946
GCA_030272155.1	GO:0042910	WIA44462.1_GCA_030272155,WIA44445.1_GCA_030272155,WIA44444.1_GCA_030272155,WIA44443.1_GCA_030272155,WIA43916.1_GCA_030272155,WIA43915.1_GCA_030272155,WIA42205.1_GCA_030272155,WIA42198.1_GCA_030272155,WIA38316.1_GCA_030272155,WIA38315.1_GCA_030272155,WIA37911.1_GCA_030272155,WIA36457.1_GCA_030272155,WIA35564.1_GCA_030272155,WIA35373.1_GCA_030272155,WIA34702.1_GCA_030272155,WIA32752.1_GCA_030272155…	18	Enables the directed movement of a xenobiotic from one side of a membrane to the other. A xenobiotic is a compound foreign to the organim exposed to it. It may be synthesized by another organism (like ampicilin) or it can be a synthetic chemical.	MF	xenobiotic transmembrane transporter activity	0.199424
SAMC4339298	GO:0015097	august_c_000000017500_split_00021-g10823.t1	1	Enables the transfer of mercury (Hg) ions from one side of a membrane to the other.	MF	mercury ion transmembrane transporter activity	0.00760861
SAMC4339298	GO:0015694	august_c_000000017500_split_00021-g10823.t1	1	The directed movement of mercury (Hg) ions into, out of or within a cell, or between cells, by means of some agent such as a transporter or pore.	BP	mercury ion transport	0.0131926
SAMC4339298	GO:0006824	august_c_000000032821_split_00010-g2206.t1	1	The directed movement of cobalt (Co) ions into, out of or within a cell, or between cells, by means of some agent such as a transporter or pore.	BP	cobalt ion transport	0.0131926
SAMC4339298	GO:0015087	august_c_000000032821_split_00010-g2206.t1	1	Enables the transfer of cobalt (Co) ions from one side of a membrane to the other.	MF	cobalt ion transmembrane transporter activity	0.00760861
SAMC4339298	GO:0015099	august_c_000000017500_split_00026-g14132.t1	1	Enables the transfer of nickel (Ni) cations from one side of a membrane to the other.	MF	nickel cation transmembrane transporter activity	0.00760861
SAMC4339298	GO:0035444	august_c_000000017500_split_00026-g14132.t1	1	The directed movement of nickel (Ni) cations across a membrane by means of some agent such as a transporter or pore.	BP	nickel cation transmembrane transport	0.0131926

## Sheet: Table S3
species	GO_ID	Gene	Count	DEFINITION	Ontology	Term	Percentage
SAMC4339295	GO:0004096	august_c_000000128483_split_00001-g359.t1,august_c_000000106252_split_00001-g9830.t1,august_c_000000163303_split_00002-g4370.t1,august_c_000000139120_split_00001-g196.t1,2_rna-gnl|WGS:LSYV|mrna.GPECTOR_190g294_R0,august_c_000000018361_split_00001-g15359.t1,august_c_000000017546_split_00001-g15358.t1,august_c_000000120141_split_00001-g153.t1	8	Catalysis of the reaction: 2 hydrogen peroxide = O2 + 2 H2O.	MF	catalase activity	0.0990467
SAMC4339296	GO:0004096	2_rna-gnl|WGS:LSYV|mrna.GPECTOR_190g294_R0,4_rna-gnl|OEZ86|Sobl_g08130.t1_R1,august_c_000000025814_split_00002-g8869.t1	3	Catalysis of the reaction: 2 hydrogen peroxide = O2 + 2 H2O.	MF	catalase activity	0.0386299
SAMC4339297	GO:0004096	4_rna-gnl|OEZ86|Sobl_g08130.t2_R0,4_rna-gnl|OEZ86|Sobl_g18905.t1_R0,4_rna-gnl|OEZ86|Sobl_g08055.t1_R0	3	Catalysis of the reaction: 2 hydrogen peroxide = O2 + 2 H2O.	MF	catalase activity	0.0306905
SAMC4339300	GO:0004096	4_rna-gnl|OEZ86|Sobl_g08055.t1_R0,august_c_000000056446_split_00001-g9383.t1	2	Catalysis of the reaction: 2 hydrogen peroxide = O2 + 2 H2O.	MF	catalase activity	0.0208572
SAMC4339298	GO:0004096	4_rna-gnl|OEZ86|Sobl_g18905.t1_R0,august_c_000000006940_split_00001-g7056.t1,august_c_000000020000_split_00001-g2750.t1,3_rna-gnl|WGS:JASKMD|H.pluvialis_07739_R1,1_rna-VOLCADRAFT_121525_R3,august_c_000000026321_split_00001-g12177.t1,august_c_000000033723_split_00001-g4766.t1,1_rna-VOLCADRAFT_74635_R0	8	Catalysis of the reaction: 2 hydrogen peroxide = O2 + 2 H2O.	MF	catalase activity	0.0608689
SAMC4339299	GO:0004096	4_rna-gnl|OEZ86|Sobl_g08055.t1_R0,4_rna-gnl|OEZ86|Sobl_g18905.t1_R0,august_c_000000052164_split_00001-g13019.t1,1_rna-VOLCADRAFT_74635_R0,august_c_000000024935_split_00001-g12234.t1	5	Catalysis of the reaction: 2 hydrogen peroxide = O2 + 2 H2O.	MF	catalase activity	0.0512821
SAMC4339301	GO:0004096	4_rna-gnl|OEZ86|Sobl_g08055.t1_R0,4_rna-gnl|OEZ86|Sobl_g08130.t1_R0	2	Catalysis of the reaction: 2 hydrogen peroxide = O2 + 2 H2O.	MF	catalase activity	0.0263678
GCA_000611645.1	GO:0004096	KIY96954.1_GCA_000611645	1	Catalysis of the reaction: 2 hydrogen peroxide = O2 + 2 H2O.	MF	catalase activity	0.0154321
GCA_003203535.1	GO:0004096	GBF95377.1_GCA_003203535	1	Catalysis of the reaction: 2 hydrogen peroxide = O2 + 2 H2O.	MF	catalase activity	0.0151676
GCA_014080715.1	GO:0004096	KAF6252859.1_GCA_014080715	1	Catalysis of the reaction: 2 hydrogen peroxide = O2 + 2 H2O.	MF	catalase activity	0.0145539
GCA_014905635.1	GO:0004096	KAF8066435.1_GCA_014905635	1	Catalysis of the reaction: 2 hydrogen peroxide = O2 + 2 H2O.	MF	catalase activity	0.0172622
GCA_025201885.1	GO:0004096	KAI8465118.1_GCA_025201885	1	Catalysis of the reaction: 2 hydrogen peroxide = O2 + 2 H2O.	MF	catalase activity	0.0143947
GCA_030272055.1	GO:0004096	WIA23741.1_GCA_030272055	1	Catalysis of the reaction: 2 hydrogen peroxide = O2 + 2 H2O.	MF	catalase activity	0.0114574
GCA_030272155.1	GO:0004096	WIA44253.1_GCA_030272155,WIA44252.1_GCA_030272155,WIA44251.1_GCA_030272155	3	Catalysis of the reaction: 2 hydrogen peroxide = O2 + 2 H2O.	MF	catalase activity	0.0332373
SAMC4339295	GO:0006537	3_rna-gnl|WGS:JASKMD|H.pluvialis_05234_R0,august_c_000000057196_split_00001-g11105.t1,2_rna-gnl|WGS:LSYV|mrna.GPECTOR_35g845_R0	3	The chemical reactions and pathways resulting in the formation of glutamate, the anion of 2-aminopentanedioic acid.	BP	glutamate biosynthetic process	0.0596659
SAMC4339296	GO:0006537	4_rna-gnl|OEZ86|Sobl_g24716.t2_R0,4_rna-gnl|OEZ86|Sobl_g07491.t3_R0,august_c_000000014794_split_00001-g4423.t1	3	The chemical reactions and pathways resulting in the formation of glutamate, the anion of 2-aminopentanedioic acid.	BP	glutamate biosynthetic process	0.0625652
SAMC4339297	GO:0006537	2_rna-gnl|WGS:LSYV|mrna.GPECTOR_35g845_R1,4_rna-gnl|OEZ86|Sobl_g24716.t3_R0	2	The chemical reactions and pathways resulting in the formation of glutamate, the anion of 2-aminopentanedioic acid.	BP	glutamate biosynthetic process	0.0696379
SAMC4339300	GO:0006537	4_rna-gnl|OEZ86|Sobl_g07491.t1_R0,4_rna-gnl|OEZ86|Sobl_g24716.t2_R0,august_c_000000011613_split_00002-g16783.t1,august_c_000000011613_split_00002-g16782.t1	4	The chemical reactions and pathways resulting in the formation of glutamate, the anion of 2-aminopentanedioic acid.	BP	glutamate biosynthetic process	0.0675562
SAMC4339298	GO:0006537	august_c_000000017807_split_00003-g7729.t1,august_c_000000032303_split_00004-g3677.t1,2_rna-gnl|WGS:LSYV|mrna.GPECTOR_35g845_R2,3_rna-gnl|WGS:JASKMD|H.pluvialis_10758_R0,1_rna-VOLCADRAFT_108038_R0	5	The chemical reactions and pathways resulting in the formation of glutamate, the anion of 2-aminopentanedioic acid.	BP	glutamate biosynthetic process	0.0659631
SAMC4339299	GO:0006537	august_c_000000044818_split_00003-g16153.t1	1	The chemical reactions and pathways resulting in the formation of glutamate, the anion of 2-aminopentanedioic acid.	BP	glutamate biosynthetic process	0.0174368
SAMC4339301	GO:0006537	4_rna-gnl|OEZ86|Sobl_g24716.t2_R0	1	The chemical reactions and pathways resulting in the formation of glutamate, the anion of 2-aminopentanedioic acid.	BP	glutamate biosynthetic process	0.0208507
GCA_000611645.1	GO:0006537	KIY94837.1_GCA_000611645,KIZ04404.1_GCA_000611645	2	The chemical reactions and pathways resulting in the formation of glutamate, the anion of 2-aminopentanedioic acid.	BP	glutamate biosynthetic process	0.0670691
GCA_003203535.1	GO:0006537	GBF96450.1_GCA_003203535,GBF99216.1_GCA_003203535,GBF99384.1_GCA_003203535	3	The chemical reactions and pathways resulting in the formation of glutamate, the anion of 2-aminopentanedioic acid.	BP	glutamate biosynthetic process	0.101146
GCA_014080715.1	GO:0006537	KAF6263529.1_GCA_014080715,KAF6263375.1_GCA_014080715	2	The chemical reactions and pathways resulting in the formation of glutamate, the anion of 2-aminopentanedioic acid.	BP	glutamate biosynthetic process	0.0669344
GCA_014905635.1	GO:0006537	KAF8066383.1_GCA_014905635,KAF8065477.1_GCA_014905635	2	The chemical reactions and pathways resulting in the formation of glutamate, the anion of 2-aminopentanedioic acid.	BP	glutamate biosynthetic process	0.0739098
GCA_025201885.1	GO:0006537	KAI8471424.1_GCA_025201885,KAI8464547.1_GCA_025201885,KAI8464152.1_GCA_025201885	3	The chemical reactions and pathways resulting in the formation of glutamate, the anion of 2-aminopentanedioic acid.	BP	glutamate biosynthetic process	0.0953592
GCA_030272055.1	GO:0006537	WIA16584.1_GCA_030272055,WIA23001.1_GCA_030272055,WIA23002.1_GCA_030272055,WIA23003.1_GCA_030272055	4	The chemical reactions and pathways resulting in the formation of glutamate, the anion of 2-aminopentanedioic acid.	BP	glutamate biosynthetic process	0.104521
GCA_030272155.1	GO:0006537	WIA43453.1_GCA_030272155,WIA43452.1_GCA_030272155,WIA43451.1_GCA_030272155,WIA36784.1_GCA_030272155,WIA36783.1_GCA_030272155,WIA36782.1_GCA_030272155,WIA36781.1_GCA_030272155	7	The chemical reactions and pathways resulting in the formation of glutamate, the anion of 2-aminopentanedioic acid.	BP	glutamate biosynthetic process	0.176723
SAMC4339295	GO:0006536	august_c_000000008944_split_00001-g11248.t1,4_rna-gnl|OEZ86|Sobl_g22341.t1_R0,4_rna-gnl|OEZ86|Sobl_g00287.t1_R0	3	The chemical reactions and pathways involving glutamate, the anion of 2-aminopentanedioic acid.	BP	glutamate metabolic process	0.0596659
SAMC4339296	GO:0006536	august_c_000000018723_split_00001-g8381.t1	1	The chemical reactions and pathways involving glutamate, the anion of 2-aminopentanedioic acid.	BP	glutamate metabolic process	0.0208551
SAMC4339297	GO:0006536	august_c_000000043101_split_00003-g337.t1,august_c_000000043101_split_00004-g8628.t1,3_rna-gnl|WGS:JASKMD|H.pluvialis_01280_R0,august_c_000000074269_split_00001-g3023.t1	4	The chemical reactions and pathways involving glutamate, the anion of 2-aminopentanedioic acid.	BP	glutamate metabolic process	0.0348189
SAMC4339300	GO:0006536	4_rna-gnl|OEZ86|Sobl_g00287.t1_R0,august_c_000000042394_split_00001-g6388.t1,august_c_000000037243_split_00001-g8048.t1	3	The chemical reactions and pathways involving glutamate, the anion of 2-aminopentanedioic acid.	BP	glutamate metabolic process	0.0506671
SAMC4339298	GO:0006536	august_c_000000029280_split_00001-g20590.t1,4_rna-gnl|OEZ86|Sobl_g00287.t1_R0,august_c_000000035492_split_00001-g19615.t1	3	The chemical reactions and pathways involving glutamate, the anion of 2-aminopentanedioic acid.	BP	glutamate metabolic process	0.0395778
SAMC4339299	GO:0006536	august_c_000000054421_split_00001-g1183.t1,4_rna-gnl|OEZ86|Sobl_g00287.t1_R0,august_c_000000004316_split_00001-g1934.t1	3	The chemical reactions and pathways involving glutamate, the anion of 2-aminopentanedioic acid.	BP	glutamate metabolic process	0.0523104
SAMC4339301	GO:0006536	4_rna-gnl|OEZ86|Sobl_g00287.t1_R0	1	The chemical reactions and pathways involving glutamate, the anion of 2-aminopentanedioic acid.	BP	glutamate metabolic process	0.0208507
SAMC4339296	GO:0016040	4_rna-gnl|OEZ86|Sobl_g07491.t3_R0	1	Catalysis of the reaction: 2 L-glutamate + NAD+ = 2-oxoglutarate + L-glutamine + H+ + NADH.	MF	glutamate synthase (NADH) activity	0.0128766
SAMC4339300	GO:0016040	4_rna-gnl|OEZ86|Sobl_g07491.t1_R0	1	Catalysis of the reaction: 2 L-glutamate + NAD+ = 2-oxoglutarate + L-glutamine + H+ + NADH.	MF	glutamate synthase (NADH) activity	0.0104286
SAMC4339298	GO:0016040	1_rna-VOLCADRAFT_108038_R0	1	Catalysis of the reaction: 2 L-glutamate + NAD+ = 2-oxoglutarate + L-glutamine + H+ + NADH.	MF	glutamate synthase (NADH) activity	0.00760861
SAMC4339295	GO:0015930	3_rna-gnl|WGS:JASKMD|H.pluvialis_05234_R0,august_c_000000057196_split_00001-g11105.t1,2_rna-gnl|WGS:LSYV|mrna.GPECTOR_35g845_R0	3	Catalysis of the formation of L-glutamine and 2-oxoglutarate from L-glutamate, using NADH, NADPH or ferredoxin as hydrogen acceptors.	MF	glutamate synthase activity	0.0371425
SAMC4339296	GO:0015930	4_rna-gnl|OEZ86|Sobl_g24716.t2_R0,4_rna-gnl|OEZ86|Sobl_g07491.t3_R0,august_c_000000014794_split_00001-g4423.t1	3	Catalysis of the formation of L-glutamine and 2-oxoglutarate from L-glutamate, using NADH, NADPH or ferredoxin as hydrogen acceptors.	MF	glutamate synthase activity	0.0386299
SAMC4339297	GO:0015930	2_rna-gnl|WGS:LSYV|mrna.GPECTOR_35g845_R1,4_rna-gnl|OEZ86|Sobl_g24716.t3_R0	2	Catalysis of the formation of L-glutamine and 2-oxoglutarate from L-glutamate, using NADH, NADPH or ferredoxin as hydrogen acceptors.	MF	glutamate synthase activity	0.0204604
SAMC4339300	GO:0015930	3_rna-gnl|WGS:JASKMD|H.pluvialis_05234_R1,4_rna-gnl|OEZ86|Sobl_g07491.t1_R0,4_rna-gnl|OEZ86|Sobl_g24716.t2_R0,august_c_000000011613_split_00002-g16783.t1	4	Catalysis of the formation of L-glutamine and 2-oxoglutarate from L-glutamate, using NADH, NADPH or ferredoxin as hydrogen acceptors.	MF	glutamate synthase activity	0.0417145
SAMC4339298	GO:0015930	august_c_000000017807_split_00002-g3684.t1,august_c_000000017807_split_00003-g7729.t1,2_rna-gnl|WGS:LSYV|mrna.GPECTOR_35g845_R2,3_rna-gnl|WGS:JASKMD|H.pluvialis_10758_R0,1_rna-VOLCADRAFT_108038_R0	5	Catalysis of the formation of L-glutamine and 2-oxoglutarate from L-glutamate, using NADH, NADPH or ferredoxin as hydrogen acceptors.	MF	glutamate synthase activity	0.0380431
SAMC4339299	GO:0015930	3_rna-gnl|WGS:JASKMD|H.pluvialis_05234_R0,august_c_000000044818_split_00003-g16153.t1	2	Catalysis of the formation of L-glutamine and 2-oxoglutarate from L-glutamate, using NADH, NADPH or ferredoxin as hydrogen acceptors.	MF	glutamate synthase activity	0.0205128
SAMC4339301	GO:0015930	august_c_000000017566_split_00001-g1373.t1,4_rna-gnl|OEZ86|Sobl_g24716.t2_R0	2	Catalysis of the formation of L-glutamine and 2-oxoglutarate from L-glutamate, using NADH, NADPH or ferredoxin as hydrogen acceptors.	MF	glutamate synthase activity	0.0263678
GCA_000611645.1	GO:0015930	KIY94837.1_GCA_000611645,KIZ01899.1_GCA_000611645,KIZ04404.1_GCA_000611645	3	Catalysis of the formation of L-glutamine and 2-oxoglutarate from L-glutamate, using NADH, NADPH or ferredoxin as hydrogen acceptors.	MF	glutamate synthase activity	0.0462963
GCA_003203535.1	GO:0015930	GBF90094.1_GCA_003203535,GBF96450.1_GCA_003203535,GBF99216.1_GCA_003203535,GBF99384.1_GCA_003203535	4	Catalysis of the formation of L-glutamine and 2-oxoglutarate from L-glutamate, using NADH, NADPH or ferredoxin as hydrogen acceptors.	MF	glutamate synthase activity	0.0606704
GCA_014080715.1	GO:0015930	KAF6263529.1_GCA_014080715,KAF6263375.1_GCA_014080715	2	Catalysis of the formation of L-glutamine and 2-oxoglutarate from L-glutamate, using NADH, NADPH or ferredoxin as hydrogen acceptors.	MF	glutamate synthase activity	0.0291078
GCA_014905635.1	GO:0015930	KAF8066383.1_GCA_014905635,KAF8065477.1_GCA_014905635	2	Catalysis of the formation of L-glutamine and 2-oxoglutarate from L-glutamate, using NADH, NADPH or ferredoxin as hydrogen acceptors.	MF	glutamate synthase activity	0.0345244
GCA_025201885.1	GO:0015930	KAI8471424.1_GCA_025201885,KAI8464547.1_GCA_025201885,KAI8464152.1_GCA_025201885	3	Catalysis of the formation of L-glutamine and 2-oxoglutarate from L-glutamate, using NADH, NADPH or ferredoxin as hydrogen acceptors.	MF	glutamate synthase activity	0.0431841
GCA_030272055.1	GO:0015930	WIA16584.1_GCA_030272055,WIA23001.1_GCA_030272055,WIA23002.1_GCA_030272055,WIA23003.1_GCA_030272055	4	Catalysis of the formation of L-glutamine and 2-oxoglutarate from L-glutamate, using NADH, NADPH or ferredoxin as hydrogen acceptors.	MF	glutamate synthase activity	0.0458295
GCA_030272155.1	GO:0015930	WIA43453.1_GCA_030272155,WIA43452.1_GCA_030272155,WIA43451.1_GCA_030272155,WIA36784.1_GCA_030272155,WIA36783.1_GCA_030272155,WIA36782.1_GCA_030272155,WIA36781.1_GCA_030272155	7	Catalysis of the formation of L-glutamine and 2-oxoglutarate from L-glutamate, using NADH, NADPH or ferredoxin as hydrogen acceptors.	MF	glutamate synthase activity	0.0775537
SAMC4339295	GO:0004601	4_rna-gnl|OEZ86|Sobl_g07628.t2_R0,august_c_000000128483_split_00001-g359.t1,4_rna-gnl|OEZ86|Sobl_g28047.t1_R0,4_rna-gnl|OEZ86|Sobl_g03954.t1_R0,august_c_000000163303_split_00002-g4370.t1,4_rna-gnl|OEZ86|Sobl_g03954.t1_R1,2_rna-gnl|WGS:LSYV|mrna.GPECTOR_212g425_R0,4_rna-gnl|OEZ86|Sobl_g03956.t1_R1,august_c_000000023087_split_00001-g12278.t1,4_rna-gnl|OEZ86|Sobl_g07871.t1_R0,4_rna-gnl|OEZ86|Sobl_g0…	11	Catalysis of the reaction: a donor + a peroxide = an oxidized donor + 2 H2O.	MF	peroxidase activity	0.136189
SAMC4339296	GO:0004601	august_c_000000024524_split_00001-g12928.t1,2_rna-gnl|WGS:LSYV|mrna.GPECTOR_212g425_R0,august_c_000000025332_split_00002-g3200.t1,august_c_000000025332_split_00003-g4454.t1,august_c_000000026983_split_00001-g13896.t1,4_rna-gnl|OEZ86|Sobl_g28047.t1_R0,august_c_000000025814_split_00002-g8869.t1,4_rna-gnl|OEZ86|Sobl_g18950.t1_R0,2_rna-gnl|WGS:LSYV|mrna.GPECTOR_1g87_R0,1_rna-VOLCADRAFT_82395_R0	10	Catalysis of the reaction: a donor + a peroxide = an oxidized donor + 2 H2O.	MF	peroxidase activity	0.128766
SAMC4339297	GO:0004601	4_rna-gnl|OEZ86|Sobl_g07871.t1_R0,august_c_000000071620_split_00001-g13915.t1,august_c_000000012936_split_00001-g17549.t1,4_rna-gnl|OEZ86|Sobl_g03956.t1_R0,4_rna-gnl|OEZ86|Sobl_g13374.t1_R0,august_c_000000009194_split_00001-g4263.t1,august_c_000000071447_split_00001-g141.t1,august_c_000000086356_split_00001-g19820.t1,august_c_000000068697_split_00001-g7624.t1,august_c_000000055778_split_00001-g15…	20	Catalysis of the reaction: a donor + a peroxide = an oxidized donor + 2 H2O.	MF	peroxidase activity	0.204604
SAMC4339300	GO:0004601	august_c_000000011438_split_00001-g2522.t1,august_c_000000025107_split_00001-g3700.t1,4_rna-gnl|OEZ86|Sobl_g03956.t1_R0,4_rna-gnl|OEZ86|Sobl_g03739.t1_R0,4_rna-gnl|OEZ86|Sobl_g04010.t1_R0,4_rna-gnl|OEZ86|Sobl_g08055.t1_R0,4_rna-gnl|OEZ86|Sobl_g13374.t1_R0,4_rna-gnl|OEZ86|Sobl_g28047.t1_R0,4_rna-gnl|OEZ86|Sobl_g03956.t1_R1,august_c_000000041551_split_00001-g854.t1,august_c_000000039010_split_00001…	21	Catalysis of the reaction: a donor + a peroxide = an oxidized donor + 2 H2O.	MF	peroxidase activity	0.219001
SAMC4339298	GO:0004601	4_rna-gnl|OEZ86|Sobl_g03956.t1_R0,august_c_000000029240_split_00001-g8553.t1,4_rna-gnl|OEZ86|Sobl_g28047.t1_R0,4_rna-gnl|OEZ86|Sobl_g18905.t1_R0,4_rna-gnl|OEZ86|Sobl_g07871.t1_R0,4_rna-gnl|OEZ86|Sobl_g07628.t1_R0,4_rna-gnl|OEZ86|Sobl_g14487.t1_R0,4_rna-gnl|OEZ86|Sobl_g04861.t1_R0,august_c_000000030192_split_00001-g4806.t1,4_rna-gnl|OEZ86|Sobl_g22841.t1_R0,august_c_000000006940_split_00001-g7056.t…	21	Catalysis of the reaction: a donor + a peroxide = an oxidized donor + 2 H2O.	MF	peroxidase activity	0.159781
SAMC4339299	GO:0004601	4_rna-gnl|OEZ86|Sobl_g03956.t1_R0,4_rna-gnl|OEZ86|Sobl_g20725.t1_R0,august_c_000000005132_split_00002-g5132.t1,4_rna-gnl|OEZ86|Sobl_g03739.t1_R0,4_rna-gnl|OEZ86|Sobl_g08055.t1_R0,4_rna-gnl|OEZ86|Sobl_g18950.t1_R0,4_rna-gnl|OEZ86|Sobl_g28047.t1_R0,4_rna-gnl|OEZ86|Sobl_g18905.t1_R0,august_c_000000019751_split_00001-g4826.t1,august_c_000000052164_split_00001-g13019.t1,august_c_000000029595_split_000…	21	Catalysis of the reaction: a donor + a peroxide = an oxidized donor + 2 H2O.	MF	peroxidase activity	0.215385
SAMC4339301	GO:0004601	4_rna-gnl|OEZ86|Sobl_g08055.t1_R0,august_c_000000015727_split_00001-g8162.t1,2_rna-gnl|WGS:LSYV|mrna.GPECTOR_212g425_R0,4_rna-gnl|OEZ86|Sobl_g28047.t1_R0,4_rna-gnl|OEZ86|Sobl_g27498.t1_R0,august_c_000000005064_split_00002-g5704.t1,2_rna-gnl|WGS:LSYV|mrna.GPECTOR_34g747_R0,2_rna-gnl|WGS:LSYV|mrna.GPECTOR_1g87_R0,august_c_000000020054_split_00003-g8610.t1	9	Catalysis of the reaction: a donor + a peroxide = an oxidized donor + 2 H2O.	MF	peroxidase activity	0.118655
GCA_000611645.1	GO:0004601	KIY91648.1_GCA_000611645,KIY91898.1_GCA_000611645,KIY92545.1_GCA_000611645,KIY93953.1_GCA_000611645,KIY98092.1_GCA_000611645,KIZ02552.1_GCA_000611645,KIZ04422.1_GCA_000611645,KIZ05573.1_GCA_000611645,KIZ06814.1_GCA_000611645	9	Catalysis of the reaction: a donor + a peroxide = an oxidized donor + 2 H2O.	MF	peroxidase activity	0.138889
GCA_003203535.1	GO:0004601	GBF90124.1_GCA_003203535,GBF92760.1_GCA_003203535,GBF93758.1_GCA_003203535,GBF99302.1_GCA_003203535	4	Catalysis of the reaction: a donor + a peroxide = an oxidized donor + 2 H2O.	MF	peroxidase activity	0.0606704
GCA_014080715.1	GO:0004601	KAF6261953.1_GCA_014080715,KAF6261495.1_GCA_014080715,KAF6258420.1_GCA_014080715,KAF6257348.1_GCA_014080715,KAF6256178.1_GCA_014080715,KAF6255299.1_GCA_014080715,KAF6250747.1_GCA_014080715,KAF6240833.1_GCA_014080715,KAF6238216.1_GCA_014080715	9	Catalysis of the reaction: a donor + a peroxide = an oxidized donor + 2 H2O.	MF	peroxidase activity	0.130985
GCA_014905635.1	GO:0004601	KAF8069376.1_GCA_014905635,KAF8065494.1_GCA_014905635,KAF8064528.1_GCA_014905635,KAF8061412.1_GCA_014905635,KAF8061077.1_GCA_014905635,KAF8058871.1_GCA_014905635,KAF8057109.1_GCA_014905635,KAF8056140.1_GCA_014905635	8	Catalysis of the reaction: a donor + a peroxide = an oxidized donor + 2 H2O.	MF	peroxidase activity	0.138098
GCA_025201885.1	GO:0004601	KAI8477043.1_GCA_025201885,KAI8476664.1_GCA_025201885,KAI8473930.1_GCA_025201885,KAI8473491.1_GCA_025201885,KAI8472771.1_GCA_025201885,KAI8467305.1_GCA_025201885	6	Catalysis of the reaction: a donor + a peroxide = an oxidized donor + 2 H2O.	MF	peroxidase activity	0.0863682
GCA_030272055.1	GO:0004601	WIA10432.1_GCA_030272055,WIA13321.1_GCA_030272055,WIA13810.1_GCA_030272055,WIA14468.1_GCA_030272055,WIA14470.1_GCA_030272055,WIA19259.1_GCA_030272055,WIA19641.1_GCA_030272055,WIA19642.1_GCA_030272055,WIA19643.1_GCA_030272055,WIA22263.1_GCA_030272055,WIA23161.1_GCA_030272055,WIA23162.1_GCA_030272055,WIA23413.1_GCA_030272055,WIA23655.1_GCA_030272055	14	Catalysis of the reaction: a donor + a peroxide = an oxidized donor + 2 H2O.	MF	peroxidase activity	0.160403
GCA_030272155.1	GO:0004601	WIA44142.1_GCA_030272155,WIA43888.1_GCA_030272155,WIA43612.1_GCA_030272155,WIA43611.1_GCA_030272155,WIA42721.1_GCA_030272155,WIA39915.1_GCA_030272155,WIA39530.1_GCA_030272155,WIA34648.1_GCA_030272155,WIA34647.1_GCA_030272155,WIA33957.1_GCA_030272155,WIA30484.1_GCA_030272155	11	Catalysis of the reaction: a donor + a peroxide = an oxidized donor + 2 H2O.	MF	peroxidase activity	0.12187
SAMC4339295	GO:0005777	4_rna-gnl|OEZ86|Sobl_g06438.t1_R0,4_rna-gnl|OEZ86|Sobl_g01028.t1_R0,august_c_000000100383_split_00001-g10980.t1,4_rna-gnl|OEZ86|Sobl_g07436.t1_R0,4_rna-gnl|OEZ86|Sobl_g02464.t1_R0,4_rna-gnl|OEZ86|Sobl_g06433.t1_R0,august_c_000000136737_split_00001-g9335.t1,august_c_000000033888_split_00001-g510.t1,august_c_000000010686_split_00001-g11571.t1	9	A small organelle enclosed by a single membrane, and found in most eukaryotic cells. Contains peroxidases and other enzymes involved in a variety of metabolic processes including free radical detoxification, lipid catabolism and biosynthesis, and hydrogen peroxide metabolism.	CC	peroxisome	0.529101
SAMC4339296	GO:0005777	4_rna-gnl|OEZ86|Sobl_g06438.t1_R0,4_rna-gnl|OEZ86|Sobl_g01028.t1_R0,4_rna-gnl|OEZ86|Sobl_g00201.t1_R0,4_rna-gnl|OEZ86|Sobl_g02464.t1_R0,august_c_000000008045_split_00002-g13512.t1,august_c_000000009278_split_00002-g9576.t1,3_rna-gnl|WGS:JASKMD|H.pluvialis_27072_R0,august_c_000000003597_split_00005-g5373.t1,august_c_000000009278_split_00001-g9585.t1,3_rna-gnl|WGS:JASKMD|H.pluvialis_13049_R0	10	A small organelle enclosed by a single membrane, and found in most eukaryotic cells. Contains peroxidases and other enzymes involved in a variety of metabolic processes including free radical detoxification, lipid catabolism and biosynthesis, and hydrogen peroxide metabolism.	CC	peroxisome	0.601323
SAMC4339297	GO:0005777	4_rna-gnl|OEZ86|Sobl_g06438.t1_R0,august_c_000000070345_split_00001-g11980.t1,august_c_000000086193_split_00001-g16389.t1,4_rna-gnl|OEZ86|Sobl_g14103.t1_R1,august_c_000000012350_split_00001-g14219.t1,august_c_000000044551_split_00001-g19185.t1,3_rna-gnl|WGS:JASKMD|H.pluvialis_27072_R1,2_rna-gnl|WGS:LSYV|mrna.GPECTOR_29g92_R0,august_c_000000023412_split_00001-g2035.t1,august_c_000000067672_split_0…	13	A small organelle enclosed by a single membrane, and found in most eukaryotic cells. Contains peroxidases and other enzymes involved in a variety of metabolic processes including free radical detoxification, lipid catabolism and biosynthesis, and hydrogen peroxide metabolism.	CC	peroxisome	0.678497
SAMC4339300	GO:0005777	4_rna-gnl|OEZ86|Sobl_g06438.t1_R0,4_rna-gnl|OEZ86|Sobl_g14420.t1_R0,4_rna-gnl|OEZ86|Sobl_g00201.t1_R0,august_c_000000007300_split_00001-g13142.t1,4_rna-gnl|OEZ86|Sobl_g07436.t1_R0,4_rna-gnl|OEZ86|Sobl_g02464.t1_R0,august_c_000000012978_split_00001-g12676.t1	7	A small organelle enclosed by a single membrane, and found in most eukaryotic cells. Contains peroxidases and other enzymes involved in a variety of metabolic processes including free radical detoxification, lipid catabolism and biosynthesis, and hydrogen peroxide metabolism.	CC	peroxisome	0.375134
SAMC4339298	GO:0005777	4_rna-gnl|OEZ86|Sobl_g01028.t1_R0,2_rna-gnl|WGS:LSYV|mrna.GPECTOR_22g851_R0,4_rna-gnl|OEZ86|Sobl_g02464.t1_R0,4_rna-gnl|OEZ86|Sobl_g06433.t1_R0,4_rna-gnl|OEZ86|Sobl_g14420.t1_R0,august_c_000000027370_split_00001-g14963.t1,4_rna-gnl|OEZ86|Sobl_g07438.t1_R0,august_c_000000024055_split_00002-g14650.t1,4_rna-gnl|OEZ86|Sobl_g07436.t1_R0	9	A small organelle enclosed by a single membrane, and found in most eukaryotic cells. Contains peroxidases and other enzymes involved in a variety of metabolic processes including free radical detoxification, lipid catabolism and biosynthesis, and hydrogen peroxide metabolism.	CC	peroxisome	0.374532
SAMC4339299	GO:0005777	4_rna-gnl|OEZ86|Sobl_g01028.t1_R0,4_rna-gnl|OEZ86|Sobl_g06438.t1_R0,4_rna-gnl|OEZ86|Sobl_g00201.t2_R0,3_rna-gnl|WGS:JASKMD|H.pluvialis_13049_R0,august_c_000000017092_split_00001-g17613.t1,2_rna-gnl|WGS:LSYV|mrna.GPECTOR_4g951_R0,4_rna-gnl|OEZ86|Sobl_g14420.t1_R0,august_c_000000035242_split_00001-g1965.t1,4_rna-gnl|OEZ86|Sobl_g07438.t1_R0,august_c_000000054238_split_00004-g16324.t1,august_c_000000…	13	A small organelle enclosed by a single membrane, and found in most eukaryotic cells. Contains peroxidases and other enzymes involved in a variety of metabolic processes including free radical detoxification, lipid catabolism and biosynthesis, and hydrogen peroxide metabolism.	CC	peroxisome	0.670795
SAMC4339301	GO:0005777	4_rna-gnl|OEZ86|Sobl_g06438.t1_R0,august_c_000000002976_split_00002-g11408.t1,3_rna-gnl|WGS:JASKMD|H.pluvialis_27072_R0,4_rna-gnl|OEZ86|Sobl_g02464.t1_R0,4_rna-gnl|OEZ86|Sobl_g06433.t1_R0,4_rna-gnl|OEZ86|Sobl_g00201.t1_R0,1_rna-VOLCADRAFT_93927_R0	7	A small organelle enclosed by a single membrane, and found in most eukaryotic cells. Contains peroxidases and other enzymes involved in a variety of metabolic processes including free radical detoxification, lipid catabolism and biosynthesis, and hydrogen peroxide metabolism.	CC	peroxisome	0.425273
GCA_000611645.1	GO:0005777	KIY98402.1_GCA_000611645,KIY92136.1_GCA_000611645,KIY94391.1_GCA_000611645,KIY94458.1_GCA_000611645	4	A small organelle enclosed by a single membrane, and found in most eukaryotic cells. Contains peroxidases and other enzymes involved in a variety of metabolic processes including free radical detoxification, lipid catabolism and biosynthesis, and hydrogen peroxide metabolism.	CC	peroxisome	0.436205
GCA_003203535.1	GO:0005777	GBF92060.1_GCA_003203535,GBF88240.1_GCA_003203535,GBF88254.1_GCA_003203535,GBF98145.1_GCA_003203535,GBF98378.1_GCA_003203535,GBF99634.1_GCA_003203535	6	A small organelle enclosed by a single membrane, and found in most eukaryotic cells. Contains peroxidases and other enzymes involved in a variety of metabolic processes including free radical detoxification, lipid catabolism and biosynthesis, and hydrogen peroxide metabolism.	CC	peroxisome	0.625
GCA_014080715.1	GO:0005777	KAF6266736.1_GCA_014080715,KAF6261455.1_GCA_014080715,KAF6257631.1_GCA_014080715,KAF6252939.1_GCA_014080715,KAF6252133.1_GCA_014080715,KAF6250062.1_GCA_014080715	6	A small organelle enclosed by a single membrane, and found in most eukaryotic cells. Contains peroxidases and other enzymes involved in a variety of metabolic processes including free radical detoxification, lipid catabolism and biosynthesis, and hydrogen peroxide metabolism.	CC	peroxisome	0.646552
GCA_014905635.1	GO:0005777	KAF8072909.1_GCA_014905635,KAF8072429.1_GCA_014905635,KAF8066367.1_GCA_014905635,KAF8060094.1_GCA_014905635,KAF8059658.1_GCA_014905635,KAF8058441.1_GCA_014905635	6	A small organelle enclosed by a single membrane, and found in most eukaryotic cells. Contains peroxidases and other enzymes involved in a variety of metabolic processes including free radical detoxification, lipid catabolism and biosynthesis, and hydrogen peroxide metabolism.	CC	peroxisome	0.672646
GCA_025201885.1	GO:0005777	KAI8469429.1_GCA_025201885,KAI8469621.1_GCA_025201885,KAI8467455.1_GCA_025201885,KAI8467025.1_GCA_025201885,KAI8462801.1_GCA_025201885	5	A small organelle enclosed by a single membrane, and found in most eukaryotic cells. Contains peroxidases and other enzymes involved in a variety of metabolic processes including free radical detoxification, lipid catabolism and biosynthesis, and hydrogen peroxide metabolism.	CC	peroxisome	0.501002
GCA_030272055.1	GO:0005777	WIA09010.1_GCA_030272055,WIA08137.1_GCA_030272055,WIA17568.1_GCA_030272055,WIA20445.1_GCA_030272055,WIA21548.1_GCA_030272055,WIA21549.1_GCA_030272055,WIA22933.1_GCA_030272055	7	A small organelle enclosed by a single membrane, and found in most eukaryotic cells. Contains peroxidases and other enzymes involved in a variety of metabolic processes including free radical detoxification, lipid catabolism and biosynthesis, and hydrogen peroxide metabolism.	CC	peroxisome	0.611888
GCA_030272155.1	GO:0005777	WIA29085.1_GCA_030272155,WIA43381.1_GCA_030272155,WIA41978.1_GCA_030272155,WIA41977.1_GCA_030272155,WIA40748.1_GCA_030272155,WIA37787.1_GCA_030272155,WIA28211.1_GCA_030272155,WIA28210.1_GCA_030272155	8	A small organelle enclosed by a single membrane, and found in most eukaryotic cells. Contains peroxidases and other enzymes involved in a variety of metabolic processes including free radical detoxification, lipid catabolism and biosynthesis, and hydrogen peroxide metabolism.	CC	peroxisome	0.690846
SAMC4339295	GO:0004735	3_rna-gnl|WGS:JASKMD|H.pluvialis_03245_R1,4_rna-gnl|OEZ86|Sobl_g27942.t1_R0	2	Catalysis of the reaction: L-proline + NADP+ = 1-pyrroline-5-carboxylate + NADPH + H+.	MF	pyrroline-5-carboxylate reductase activity	0.0247617
SAMC4339296	GO:0004735	4_rna-gnl|OEZ86|Sobl_g27942.t1_R0,3_rna-gnl|WGS:JASKMD|H.pluvialis_03245_R1	2	Catalysis of the reaction: L-proline + NADP+ = 1-pyrroline-5-carboxylate + NADPH + H+.	MF	pyrroline-5-carboxylate reductase activity	0.0257533
SAMC4339297	GO:0004735	4_rna-gnl|OEZ86|Sobl_g27942.t1_R0	1	Catalysis of the reaction: L-proline + NADP+ = 1-pyrroline-5-carboxylate + NADPH + H+.	MF	pyrroline-5-carboxylate reductase activity	0.0102302
SAMC4339300	GO:0004735	4_rna-gnl|OEZ86|Sobl_g27942.t1_R1,august_c_000000044041_split_00001-g5808.t1	2	Catalysis of the reaction: L-proline + NADP+ = 1-pyrroline-5-carboxylate + NADPH + H+.	MF	pyrroline-5-carboxylate reductase activity	0.0208572
SAMC4339298	GO:0004735	4_rna-gnl|OEZ86|Sobl_g27942.t1_R0,august_c_000000027863_split_00001-g2242.t1,august_c_000000016797_split_00010-g2167.t1	3	Catalysis of the reaction: L-proline + NADP+ = 1-pyrroline-5-carboxylate + NADPH + H+.	MF	pyrroline-5-carboxylate reductase activity	0.0228258
SAMC4339299	GO:0004735	4_rna-gnl|OEZ86|Sobl_g27942.t1_R0	1	Catalysis of the reaction: L-proline + NADP+ = 1-pyrroline-5-carboxylate + NADPH + H+.	MF	pyrroline-5-carboxylate reductase activity	0.0102564
SAMC4339301	GO:0004735	4_rna-gnl|OEZ86|Sobl_g27942.t1_R0	1	Catalysis of the reaction: L-proline + NADP+ = 1-pyrroline-5-carboxylate + NADPH + H+.	MF	pyrroline-5-carboxylate reductase activity	0.0131839
SAMC4339295	GO:0004735	3_rna-gnl|WGS:JASKMD|H.pluvialis_03245_R1,4_rna-gnl|OEZ86|Sobl_g27942.t1_R0	2	Catalysis of the reaction: L-proline + NADP+ = 1-pyrroline-5-carboxylate + NADPH + H+.	MF	pyrroline-5-carboxylate reductase activity	0.0247617
SAMC4339296	GO:0004735	4_rna-gnl|OEZ86|Sobl_g27942.t1_R0,3_rna-gnl|WGS:JASKMD|H.pluvialis_03245_R1	2	Catalysis of the reaction: L-proline + NADP+ = 1-pyrroline-5-carboxylate + NADPH + H+.	MF	pyrroline-5-carboxylate reductase activity	0.0257533
SAMC4339297	GO:0004735	4_rna-gnl|OEZ86|Sobl_g27942.t1_R0	1	Catalysis of the reaction: L-proline + NADP+ = 1-pyrroline-5-carboxylate + NADPH + H+.	MF	pyrroline-5-carboxylate reductase activity	0.0102302
SAMC4339300	GO:0004735	4_rna-gnl|OEZ86|Sobl_g27942.t1_R1,august_c_000000044041_split_00001-g5808.t1	2	Catalysis of the reaction: L-proline + NADP+ = 1-pyrroline-5-carboxylate + NADPH + H+.	MF	pyrroline-5-carboxylate reductase activity	0.0208572
SAMC4339298	GO:0004735	4_rna-gnl|OEZ86|Sobl_g27942.t1_R0,august_c_000000027863_split_00001-g2242.t1,august_c_000000016797_split_00010-g2167.t1	3	Catalysis of the reaction: L-proline + NADP+ = 1-pyrroline-5-carboxylate + NADPH + H+.	MF	pyrroline-5-carboxylate reductase activity	0.0228258
SAMC4339299	GO:0004735	4_rna-gnl|OEZ86|Sobl_g27942.t1_R0	1	Catalysis of the reaction: L-proline + NADP+ = 1-pyrroline-5-carboxylate + NADPH + H+.	MF	pyrroline-5-carboxylate reductase activity	0.0102564
SAMC4339301	GO:0004735	4_rna-gnl|OEZ86|Sobl_g27942.t1_R0	1	Catalysis of the reaction: L-proline + NADP+ = 1-pyrroline-5-carboxylate + NADPH + H+.	MF	pyrroline-5-carboxylate reductase activity	0.0131839
SAMC4339295	GO:0033355	2_rna-gnl|WGS:LSYV|mrna.GPECTOR_4g678_R0,august_c_000000124902_split_00001-g10272.t1	2	A cyclic series of interconversions involving L-ascorbate and glutathione that scavenges hydrogen peroxide and reduces it to water, with concomitant oxidation of NADPH.	BP	ascorbate glutathione cycle	0.0397772
SAMC4339296	GO:0033355	4_rna-gnl|OEZ86|Sobl_g14649.t1_R0,august_c_000000027052_split_00001-g6111.t1	2	A cyclic series of interconversions involving L-ascorbate and glutathione that scavenges hydrogen peroxide and reduces it to water, with concomitant oxidation of NADPH.	BP	ascorbate glutathione cycle	0.0417101
SAMC4339297	GO:0033355	4_rna-gnl|OEZ86|Sobl_g14649.t1_R0	1	A cyclic series of interconversions involving L-ascorbate and glutathione that scavenges hydrogen peroxide and reduces it to water, with concomitant oxidation of NADPH.	BP	ascorbate glutathione cycle	0.0348189
SAMC4339300	GO:0033355	4_rna-gnl|OEZ86|Sobl_g14649.t1_R0	1	A cyclic series of interconversions involving L-ascorbate and glutathione that scavenges hydrogen peroxide and reduces it to water, with concomitant oxidation of NADPH.	BP	ascorbate glutathione cycle	0.016889
SAMC4339298	GO:0033355	august_c_000000024560_split_00003-g18060.t1	1	A cyclic series of interconversions involving L-ascorbate and glutathione that scavenges hydrogen peroxide and reduces it to water, with concomitant oxidation of NADPH.	BP	ascorbate glutathione cycle	0.0131926
SAMC4339299	GO:0033355	4_rna-gnl|OEZ86|Sobl_g14649.t1_R0	1	A cyclic series of interconversions involving L-ascorbate and glutathione that scavenges hydrogen peroxide and reduces it to water, with concomitant oxidation of NADPH.	BP	ascorbate glutathione cycle	0.0174368
SAMC4339295	GO:0016719	4_rna-gnl|OEZ86|Sobl_g24466.t1_R0	1	Catalysis of the reaction: neurosporene + donor-H2 + O2 = lycopene + acceptor + 2 H2O.	MF	carotene 7,8-desaturase activity	0.0123808
SAMC4339296	GO:0016719	1_rna-VOLCADRAFT_95071_R0	1	Catalysis of the reaction: neurosporene + donor-H2 + O2 = lycopene + acceptor + 2 H2O.	MF	carotene 7,8-desaturase activity	0.0128766
SAMC4339300	GO:0016719	4_rna-gnl|OEZ86|Sobl_g24466.t1_R0	1	Catalysis of the reaction: neurosporene + donor-H2 + O2 = lycopene + acceptor + 2 H2O.	MF	carotene 7,8-desaturase activity	0.0104286
SAMC4339301	GO:0016719	1_rna-VOLCADRAFT_95071_R0	1	Catalysis of the reaction: neurosporene + donor-H2 + O2 = lycopene + acceptor + 2 H2O.	MF	carotene 7,8-desaturase activity	0.0131839

## Sheet: Table S4
species	GO_ID	Gene	Count	DEFINITION	Ontology	Term	Percentage
SAMC4339296	GO:0042819	1_rna-VOLCADRAFT_109832_R0,3_rna-gnl|WGS:JASKMD|H.pluvialis_09573_R0	2	The chemical reactions and pathways resulting in the formation of any of the vitamin B6 compounds; pyridoxal, pyridoxamine and pyridoxine and the active form, pyridoxal phosphate.	BP	vitamin B6 biosynthetic process	0.0417101
SAMC4339297	GO:0042819	4_rna-gnl|OEZ86|Sobl_g01160.t1_R0,1_rna-VOLCADRAFT_66485_R0	2	The chemical reactions and pathways resulting in the formation of any of the vitamin B6 compounds; pyridoxal, pyridoxamine and pyridoxine and the active form, pyridoxal phosphate.	BP	vitamin B6 biosynthetic process	0.0174095
SAMC4339300	GO:0042819	4_rna-gnl|OEZ86|Sobl_g01160.t1_R0,4_rna-gnl|OEZ86|Sobl_g13210.t1_R0	2	The chemical reactions and pathways resulting in the formation of any of the vitamin B6 compounds; pyridoxal, pyridoxamine and pyridoxine and the active form, pyridoxal phosphate.	BP	vitamin B6 biosynthetic process	0.0337781
SAMC4339298	GO:0042819	4_rna-gnl|OEZ86|Sobl_g01160.t1_R0,4_rna-gnl|OEZ86|Sobl_g13210.t1_R0	2	The chemical reactions and pathways resulting in the formation of any of the vitamin B6 compounds; pyridoxal, pyridoxamine and pyridoxine and the active form, pyridoxal phosphate.	BP	vitamin B6 biosynthetic process	0.0263852
SAMC4339299	GO:0042819	4_rna-gnl|OEZ86|Sobl_g01160.t1_R0,august_c_000000028537_split_00007-g11867.t1,august_c_000000028537_split_00006-g14177.t1	3	The chemical reactions and pathways resulting in the formation of any of the vitamin B6 compounds; pyridoxal, pyridoxamine and pyridoxine and the active form, pyridoxal phosphate.	BP	vitamin B6 biosynthetic process	0.0523104
SAMC4339301	GO:0042819	3_rna-gnl|WGS:JASKMD|H.pluvialis_05956_R0,3_rna-gnl|WGS:JASKMD|H.pluvialis_09573_R0	2	The chemical reactions and pathways resulting in the formation of any of the vitamin B6 compounds; pyridoxal, pyridoxamine and pyridoxine and the active form, pyridoxal phosphate.	BP	vitamin B6 biosynthetic process	0.0417014
GCA_000611645.1	GO:0042819	KIZ02653.1_GCA_000611645	1	The chemical reactions and pathways resulting in the formation of any of the vitamin B6 compounds; pyridoxal, pyridoxamine and pyridoxine and the active form, pyridoxal phosphate.	BP	vitamin B6 biosynthetic process	0.0335345
GCA_003203535.1	GO:0042819	GBF88110.1_GCA_003203535,GBF93728.1_GCA_003203535	2	The chemical reactions and pathways resulting in the formation of any of the vitamin B6 compounds; pyridoxal, pyridoxamine and pyridoxine and the active form, pyridoxal phosphate.	BP	vitamin B6 biosynthetic process	0.0674309
GCA_014080715.1	GO:0042819	KAF6260238.1_GCA_014080715,KAF6260117.1_GCA_014080715	2	The chemical reactions and pathways resulting in the formation of any of the vitamin B6 compounds; pyridoxal, pyridoxamine and pyridoxine and the active form, pyridoxal phosphate.	BP	vitamin B6 biosynthetic process	0.0669344
GCA_014905635.1	GO:0042819	KAF8063853.1_GCA_014905635,KAF8059384.1_GCA_014905635	2	The chemical reactions and pathways resulting in the formation of any of the vitamin B6 compounds; pyridoxal, pyridoxamine and pyridoxine and the active form, pyridoxal phosphate.	BP	vitamin B6 biosynthetic process	0.0739098
GCA_025201885.1	GO:0042819	KAI8477024.1_GCA_025201885	1	The chemical reactions and pathways resulting in the formation of any of the vitamin B6 compounds; pyridoxal, pyridoxamine and pyridoxine and the active form, pyridoxal phosphate.	BP	vitamin B6 biosynthetic process	0.0317864
GCA_030272055.1	GO:0042819	WIA15879.1_GCA_030272055,WIA15880.1_GCA_030272055,WIA22085.1_GCA_030272055	3	The chemical reactions and pathways resulting in the formation of any of the vitamin B6 compounds; pyridoxal, pyridoxamine and pyridoxine and the active form, pyridoxal phosphate.	BP	vitamin B6 biosynthetic process	0.0783904
GCA_030272155.1	GO:0042819	WIA42518.1_GCA_030272155,WIA36052.1_GCA_030272155,WIA36051.1_GCA_030272155	3	The chemical reactions and pathways resulting in the formation of any of the vitamin B6 compounds; pyridoxal, pyridoxamine and pyridoxine and the active form, pyridoxal phosphate.	BP	vitamin B6 biosynthetic process	0.0757384
SAMC4339295	GO:0042819	1_rna-VOLCADRAFT_109832_R0,1_rna-VOLCADRAFT_66485_R0	2	The chemical reactions and pathways resulting in the formation of any of the vitamin B6 compounds; pyridoxal, pyridoxamine and pyridoxine and the active form, pyridoxal phosphate.	BP	vitamin B6 biosynthetic process	0.0397772
SAMC4339295	GO:0006772	4_rna-gnl|OEZ86|Sobl_g02151.t1_R0	1	The chemical reactions and pathways involving thiamine (vitamin B1), a water soluble vitamin present in fresh vegetables and meats, especially liver.	BP	thiamine metabolic process	0.0198886
SAMC4339297	GO:0006772	4_rna-gnl|OEZ86|Sobl_g02151.t1_R0	1	The chemical reactions and pathways involving thiamine (vitamin B1), a water soluble vitamin present in fresh vegetables and meats, especially liver.	BP	thiamine metabolic process	0.0348189
SAMC4339300	GO:0006772	4_rna-gnl|OEZ86|Sobl_g02151.t1_R0	1	The chemical reactions and pathways involving thiamine (vitamin B1), a water soluble vitamin present in fresh vegetables and meats, especially liver.	BP	thiamine metabolic process	0.016889
SAMC4339299	GO:0006772	4_rna-gnl|OEZ86|Sobl_g02151.t1_R0	1	The chemical reactions and pathways involving thiamine (vitamin B1), a water soluble vitamin present in fresh vegetables and meats, especially liver.	BP	thiamine metabolic process	0.0174368
SAMC4339295	GO:0009229	4_rna-gnl|OEZ86|Sobl_g02151.t1_R0	1	The chemical reactions and pathways resulting in the formation of thiamine diphosphate, a derivative of thiamine (vitamin B1) which acts as a coenzyme in a range of processes including the Krebs cycle.	BP	thiamine diphosphate biosynthetic process	0.0198886
SAMC4339296	GO:0009229	2_rna-gnl|WGS:LSYV|mrna.GPECTOR_3g341_R0	1	The chemical reactions and pathways resulting in the formation of thiamine diphosphate, a derivative of thiamine (vitamin B1) which acts as a coenzyme in a range of processes including the Krebs cycle.	BP	thiamine diphosphate biosynthetic process	0.0208551
SAMC4339297	GO:0009229	4_rna-gnl|OEZ86|Sobl_g02151.t1_R0	1	The chemical reactions and pathways resulting in the formation of thiamine diphosphate, a derivative of thiamine (vitamin B1) which acts as a coenzyme in a range of processes including the Krebs cycle.	BP	thiamine diphosphate biosynthetic process	0.0174095
SAMC4339300	GO:0009229	4_rna-gnl|OEZ86|Sobl_g02151.t1_R0	1	The chemical reactions and pathways resulting in the formation of thiamine diphosphate, a derivative of thiamine (vitamin B1) which acts as a coenzyme in a range of processes including the Krebs cycle.	BP	thiamine diphosphate biosynthetic process	0.016889
SAMC4339298	GO:0009229	august_c_000000011202_split_00003-g7967.t1,2_rna-gnl|WGS:LSYV|mrna.GPECTOR_3g341_R0	2	The chemical reactions and pathways resulting in the formation of thiamine diphosphate, a derivative of thiamine (vitamin B1) which acts as a coenzyme in a range of processes including the Krebs cycle.	BP	thiamine diphosphate biosynthetic process	0.0263852
SAMC4339299	GO:0009229	4_rna-gnl|OEZ86|Sobl_g02151.t1_R0	1	The chemical reactions and pathways resulting in the formation of thiamine diphosphate, a derivative of thiamine (vitamin B1) which acts as a coenzyme in a range of processes including the Krebs cycle.	BP	thiamine diphosphate biosynthetic process	0.0174368
SAMC4339301	GO:0009229	2_rna-gnl|WGS:LSYV|mrna.GPECTOR_3g341_R0	1	The chemical reactions and pathways resulting in the formation of thiamine diphosphate, a derivative of thiamine (vitamin B1) which acts as a coenzyme in a range of processes including the Krebs cycle.	BP	thiamine diphosphate biosynthetic process	0.0208507
GCA_000611645.1	GO:0009229	KIZ05162.1_GCA_000611645	1	The chemical reactions and pathways resulting in the formation of thiamine diphosphate, a derivative of thiamine (vitamin B1) which acts as a coenzyme in a range of processes including the Krebs cycle.	BP	thiamine diphosphate biosynthetic process	0.0335345
GCA_003203535.1	GO:0009229	GBF93661.1_GCA_003203535	1	The chemical reactions and pathways resulting in the formation of thiamine diphosphate, a derivative of thiamine (vitamin B1) which acts as a coenzyme in a range of processes including the Krebs cycle.	BP	thiamine diphosphate biosynthetic process	0.0337154
GCA_014080715.1	GO:0009229	KAF6252257.1_GCA_014080715,KAF6250655.1_GCA_014080715,KAF6250654.1_GCA_014080715	3	The chemical reactions and pathways resulting in the formation of thiamine diphosphate, a derivative of thiamine (vitamin B1) which acts as a coenzyme in a range of processes including the Krebs cycle.	BP	thiamine diphosphate biosynthetic process	0.100402
GCA_014905635.1	GO:0009229	KAF8065877.1_GCA_014905635	1	The chemical reactions and pathways resulting in the formation of thiamine diphosphate, a derivative of thiamine (vitamin B1) which acts as a coenzyme in a range of processes including the Krebs cycle.	BP	thiamine diphosphate biosynthetic process	0.0369549
GCA_025201885.1	GO:0009229	KAI8467103.1_GCA_025201885	1	The chemical reactions and pathways resulting in the formation of thiamine diphosphate, a derivative of thiamine (vitamin B1) which acts as a coenzyme in a range of processes including the Krebs cycle.	BP	thiamine diphosphate biosynthetic process	0.0317864
GCA_030272055.1	GO:0009229	WIA17194.1_GCA_030272055	1	The chemical reactions and pathways resulting in the formation of thiamine diphosphate, a derivative of thiamine (vitamin B1) which acts as a coenzyme in a range of processes including the Krebs cycle.	BP	thiamine diphosphate biosynthetic process	0.0261301
GCA_030272155.1	GO:0009229	WIA37418.1_GCA_030272155	1	The chemical reactions and pathways resulting in the formation of thiamine diphosphate, a derivative of thiamine (vitamin B1) which acts as a coenzyme in a range of processes including the Krebs cycle.	BP	thiamine diphosphate biosynthetic process	0.0252461
SAMC4339295	GO:0009228	2_rna-gnl|WGS:LSYV|mrna.GPECTOR_83g273_R0,4_rna-gnl|OEZ86|Sobl_g24296.t1_R0,4_rna-gnl|OEZ86|Sobl_g22369.t1_R0,4_rna-gnl|OEZ86|Sobl_g00552.t1_R0,2_rna-gnl|WGS:LSYV|mrna.GPECTOR_17g855_R0	5	The chemical reactions and pathways resulting in the formation of thiamine (vitamin B1), a water soluble vitamin present in fresh vegetables and meats, especially liver.	BP	thiamine biosynthetic process	0.0994431
SAMC4339296	GO:0009228	4_rna-gnl|OEZ86|Sobl_g22369.t1_R0,3_rna-gnl|WGS:JASKMD|H.pluvialis_17061_R0,2_rna-gnl|WGS:LSYV|mrna.GPECTOR_83g273_R0,3_rna-gnl|WGS:JASKMD|H.pluvialis_01245_R0,2_rna-gnl|WGS:LSYV|mrna.GPECTOR_17g855_R0,4_rna-gnl|OEZ86|Sobl_g00552.t1_R0	6	The chemical reactions and pathways resulting in the formation of thiamine (vitamin B1), a water soluble vitamin present in fresh vegetables and meats, especially liver.	BP	thiamine biosynthetic process	0.12513
SAMC4339297	GO:0009228	4_rna-gnl|OEZ86|Sobl_g01942.t1_R0,4_rna-gnl|OEZ86|Sobl_g22369.t1_R0,4_rna-gnl|OEZ86|Sobl_g07302.t1_R0,4_rna-gnl|OEZ86|Sobl_g00552.t1_R0	4	The chemical reactions and pathways resulting in the formation of thiamine (vitamin B1), a water soluble vitamin present in fresh vegetables and meats, especially liver.	BP	thiamine biosynthetic process	0.0174095
SAMC4339300	GO:0009228	4_rna-gnl|OEZ86|Sobl_g22369.t1_R0,4_rna-gnl|OEZ86|Sobl_g24296.t1_R0,2_rna-gnl|WGS:LSYV|mrna.GPECTOR_83g273_R0,4_rna-gnl|OEZ86|Sobl_g00552.t1_R0,2_rna-gnl|WGS:LSYV|mrna.GPECTOR_17g855_R0	5	The chemical reactions and pathways resulting in the formation of thiamine (vitamin B1), a water soluble vitamin present in fresh vegetables and meats, especially liver.	BP	thiamine biosynthetic process	0.0844452
SAMC4339298	GO:0009228	4_rna-gnl|OEZ86|Sobl_g24296.t1_R0,august_c_000000012680_split_00011-g21887.t1,4_rna-gnl|OEZ86|Sobl_g22369.t1_R0,2_rna-gnl|WGS:LSYV|mrna.GPECTOR_53g138_R1,2_rna-gnl|WGS:LSYV|mrna.GPECTOR_83g273_R0,august_c_000000032197_split_00005-g15796.t1,2_rna-gnl|WGS:LSYV|mrna.GPECTOR_29g115_R0,4_rna-gnl|OEZ86|Sobl_g07302.t1_R0	8	The chemical reactions and pathways resulting in the formation of thiamine (vitamin B1), a water soluble vitamin present in fresh vegetables and meats, especially liver.	BP	thiamine biosynthetic process	0.105541
SAMC4339299	GO:0009228	4_rna-gnl|OEZ86|Sobl_g22369.t1_R0,4_rna-gnl|OEZ86|Sobl_g01942.t1_R0,4_rna-gnl|OEZ86|Sobl_g00552.t1_R0,4_rna-gnl|OEZ86|Sobl_g07302.t1_R0	4	The chemical reactions and pathways resulting in the formation of thiamine (vitamin B1), a water soluble vitamin present in fresh vegetables and meats, especially liver.	BP	thiamine biosynthetic process	0.0697472
SAMC4339301	GO:0009228	august_c_000000000454_split_00002-g6771.t1,2_rna-gnl|WGS:LSYV|mrna.GPECTOR_106g130_R0,1_rna-VOLCADRAFT_110035_R0,4_rna-gnl|OEZ86|Sobl_g00552.t1_R1,2_rna-gnl|WGS:LSYV|mrna.GPECTOR_17g855_R0,4_rna-gnl|OEZ86|Sobl_g00552.t1_R0	6	The chemical reactions and pathways resulting in the formation of thiamine (vitamin B1), a water soluble vitamin present in fresh vegetables and meats, especially liver.	BP	thiamine biosynthetic process	0.125104
GCA_000611645.1	GO:0009228	KIY95519.1_GCA_000611645,KIZ01115.1_GCA_000611645	2	The chemical reactions and pathways resulting in the formation of thiamine (vitamin B1), a water soluble vitamin present in fresh vegetables and meats, especially liver.	BP	thiamine biosynthetic process	0.0670691
GCA_003203535.1	GO:0009228	GBF91198.1_GCA_003203535,GBF87746.1_GCA_003203535,GBF90401.1_GCA_003203535	3	The chemical reactions and pathways resulting in the formation of thiamine (vitamin B1), a water soluble vitamin present in fresh vegetables and meats, especially liver.	BP	thiamine biosynthetic process	0.101146
GCA_014080715.1	GO:0009228	KAF6262198.1_GCA_014080715,KAF6264484.1_GCA_014080715	2	The chemical reactions and pathways resulting in the formation of thiamine (vitamin B1), a water soluble vitamin present in fresh vegetables and meats, especially liver.	BP	thiamine biosynthetic process	0.0669344
GCA_014905635.1	GO:0009228	KAF8072607.1_GCA_014905635	1	The chemical reactions and pathways resulting in the formation of thiamine (vitamin B1), a water soluble vitamin present in fresh vegetables and meats, especially liver.	BP	thiamine biosynthetic process	0.0369549
GCA_025201885.1	GO:0009228	KAI8466667.1_GCA_025201885,KAI8474542.1_GCA_025201885,KAI8465436.1_GCA_025201885	3	The chemical reactions and pathways resulting in the formation of thiamine (vitamin B1), a water soluble vitamin present in fresh vegetables and meats, especially liver.	BP	thiamine biosynthetic process	0.0953592
GCA_030272055.1	GO:0009228	WIA14929.1_GCA_030272055,WIA14930.1_GCA_030272055,WIA08524.1_GCA_030272055	3	The chemical reactions and pathways resulting in the formation of thiamine (vitamin B1), a water soluble vitamin present in fresh vegetables and meats, especially liver.	BP	thiamine biosynthetic process	0.0783904
GCA_030272155.1	GO:0009228	WIA35102.1_GCA_030272155,WIA28581.1_GCA_030272155	2	The chemical reactions and pathways resulting in the formation of thiamine (vitamin B1), a water soluble vitamin present in fresh vegetables and meats, especially liver.	BP	thiamine biosynthetic process	0.0504923
SAMC4339295	GO:0004076	2_rna-gnl|WGS:LSYV|mrna.GPECTOR_10g802_R0	1	Catalysis of the reaction: 2 S-adenosyl-L-methionine + dethiobiotin + S(2-) = 2 5'-deoxyadenosine + 2 L-methionine + biotin + H+.	MF	biotin synthase activity	0.0123808
SAMC4339296	GO:0004076	1_rna-VOLCADRAFT_102782_R0	1	Catalysis of the reaction: 2 S-adenosyl-L-methionine + dethiobiotin + S(2-) = 2 5'-deoxyadenosine + 2 L-methionine + biotin + H+.	MF	biotin synthase activity	0.0128766
SAMC4339297	GO:0004076	4_rna-gnl|OEZ86|Sobl_g04321.t1_R0	1	Catalysis of the reaction: 2 S-adenosyl-L-methionine + dethiobiotin + S(2-) = 2 5'-deoxyadenosine + 2 L-methionine + biotin + H+.	MF	biotin synthase activity	0.0102302
SAMC4339300	GO:0004076	4_rna-gnl|OEZ86|Sobl_g04321.t1_R0	1	Catalysis of the reaction: 2 S-adenosyl-L-methionine + dethiobiotin + S(2-) = 2 5'-deoxyadenosine + 2 L-methionine + biotin + H+.	MF	biotin synthase activity	0.0104286
SAMC4339298	GO:0004076	august_c_000000017500_split_00021-g12959.t1,4_rna-gnl|OEZ86|Sobl_g04321.t1_R0	2	Catalysis of the reaction: 2 S-adenosyl-L-methionine + dethiobiotin + S(2-) = 2 5'-deoxyadenosine + 2 L-methionine + biotin + H+.	MF	biotin synthase activity	0.0152172
SAMC4339299	GO:0004076	2_rna-gnl|WGS:LSYV|mrna.GPECTOR_10g802_R1,august_c_000000013566_split_00001-g4236.t1	2	Catalysis of the reaction: 2 S-adenosyl-L-methionine + dethiobiotin + S(2-) = 2 5'-deoxyadenosine + 2 L-methionine + biotin + H+.	MF	biotin synthase activity	0.0205128
SAMC4339301	GO:0004076	4_rna-gnl|OEZ86|Sobl_g04321.t1_R0	1	Catalysis of the reaction: 2 S-adenosyl-L-methionine + dethiobiotin + S(2-) = 2 5'-deoxyadenosine + 2 L-methionine + biotin + H+.	MF	biotin synthase activity	0.0131839
SAMC4339295	GO:0009102	2_rna-gnl|WGS:LSYV|mrna.GPECTOR_10g802_R0	1	The chemical reactions and pathways resulting in the formation of biotin, cis-tetrahydro-2-oxothieno(3,4-d)imidazoline-4-valeric acid.	BP	biotin biosynthetic process	0.0198886
SAMC4339296	GO:0009102	1_rna-VOLCADRAFT_102782_R0	1	The chemical reactions and pathways resulting in the formation of biotin, cis-tetrahydro-2-oxothieno(3,4-d)imidazoline-4-valeric acid.	BP	biotin biosynthetic process	0.0208551
SAMC4339297	GO:0009102	4_rna-gnl|OEZ86|Sobl_g04321.t1_R0	1	The chemical reactions and pathways resulting in the formation of biotin, cis-tetrahydro-2-oxothieno(3,4-d)imidazoline-4-valeric acid.	BP	biotin biosynthetic process	0.0174095
SAMC4339300	GO:0009102	4_rna-gnl|OEZ86|Sobl_g04321.t1_R0	1	The chemical reactions and pathways resulting in the formation of biotin, cis-tetrahydro-2-oxothieno(3,4-d)imidazoline-4-valeric acid.	BP	biotin biosynthetic process	0.016889
SAMC4339298	GO:0009102	august_c_000000017500_split_00021-g12959.t1,4_rna-gnl|OEZ86|Sobl_g04321.t1_R0,august_c_000000023209_split_00001-g20020.t1	3	The chemical reactions and pathways resulting in the formation of biotin, cis-tetrahydro-2-oxothieno(3,4-d)imidazoline-4-valeric acid.	BP	biotin biosynthetic process	0.0395778
SAMC4339299	GO:0009102	2_rna-gnl|WGS:LSYV|mrna.GPECTOR_10g802_R1,august_c_000000013566_split_00001-g4236.t1	2	The chemical reactions and pathways resulting in the formation of biotin, cis-tetrahydro-2-oxothieno(3,4-d)imidazoline-4-valeric acid.	BP	biotin biosynthetic process	0.0348736
SAMC4339301	GO:0009102	4_rna-gnl|OEZ86|Sobl_g04321.t1_R0,august_c_000000016559_split_00001-g8887.t1	2	The chemical reactions and pathways resulting in the formation of biotin, cis-tetrahydro-2-oxothieno(3,4-d)imidazoline-4-valeric acid.	BP	biotin biosynthetic process	0.0417014
SAMC4339295	GO:0009235	4_rna-gnl|OEZ86|Sobl_g16324.t1_R0	1	The chemical reactions and pathways involving cobalamin (vitamin B12), a water-soluble vitamin characterized by possession of a corrin nucleus containing a cobalt atom.	BP	cobalamin metabolic process	0.0198886
SAMC4339296	GO:0009235	august_c_000000027377_split_00001-g15396.t1,2_rna-gnl|WGS:LSYV|mrna.GPECTOR_1g862_R0	2	The chemical reactions and pathways involving cobalamin (vitamin B12), a water-soluble vitamin characterized by possession of a corrin nucleus containing a cobalt atom.	BP	cobalamin metabolic process	0.0417101
SAMC4339297	GO:0009235	4_rna-gnl|OEZ86|Sobl_g16324.t1_R0	1	The chemical reactions and pathways involving cobalamin (vitamin B12), a water-soluble vitamin characterized by possession of a corrin nucleus containing a cobalt atom.	BP	cobalamin metabolic process	0.0174095
SAMC4339300	GO:0009235	4_rna-gnl|OEZ86|Sobl_g16324.t1_R0,4_rna-gnl|OEZ86|Sobl_g00309.t1_R0	2	The chemical reactions and pathways involving cobalamin (vitamin B12), a water-soluble vitamin characterized by possession of a corrin nucleus containing a cobalt atom.	BP	cobalamin metabolic process	0.0337781
SAMC4339298	GO:0009235	4_rna-gnl|OEZ86|Sobl_g16324.t1_R0	1	The chemical reactions and pathways involving cobalamin (vitamin B12), a water-soluble vitamin characterized by possession of a corrin nucleus containing a cobalt atom.	BP	cobalamin metabolic process	0.0131926
SAMC4339299	GO:0009235	august_c_000000004113_split_00003-g18673.t1,4_rna-gnl|OEZ86|Sobl_g16324.t1_R0	2	The chemical reactions and pathways involving cobalamin (vitamin B12), a water-soluble vitamin characterized by possession of a corrin nucleus containing a cobalt atom.	BP	cobalamin metabolic process	0.0348736
SAMC4339301	GO:0009235	august_c_000000000455_split_00002-g2850.t1,4_rna-gnl|OEZ86|Sobl_g16324.t1_R0	2	The chemical reactions and pathways involving cobalamin (vitamin B12), a water-soluble vitamin characterized by possession of a corrin nucleus containing a cobalt atom.	BP	cobalamin metabolic process	0.0417014
GCA_000611645.1	GO:0009235	KIY94315.1_GCA_000611645,KIY98784.1_GCA_000611645	2	The chemical reactions and pathways involving cobalamin (vitamin B12), a water-soluble vitamin characterized by possession of a corrin nucleus containing a cobalt atom.	BP	cobalamin metabolic process	0.0670691
GCA_003203535.1	GO:0009235	GBF98898.1_GCA_003203535,GBG00424.1_GCA_003203535	2	The chemical reactions and pathways involving cobalamin (vitamin B12), a water-soluble vitamin characterized by possession of a corrin nucleus containing a cobalt atom.	BP	cobalamin metabolic process	0.0674309
GCA_014080715.1	GO:0009235	KAF6259039.1_GCA_014080715	1	The chemical reactions and pathways involving cobalamin (vitamin B12), a water-soluble vitamin characterized by possession of a corrin nucleus containing a cobalt atom.	BP	cobalamin metabolic process	0.0334672
GCA_014905635.1	GO:0009235	KAF8062041.1_GCA_014905635	1	The chemical reactions and pathways involving cobalamin (vitamin B12), a water-soluble vitamin characterized by possession of a corrin nucleus containing a cobalt atom.	BP	cobalamin metabolic process	0.0369549
GCA_025201885.1	GO:0009235	KAI8474195.1_GCA_025201885,KAI8473629.1_GCA_025201885	2	The chemical reactions and pathways involving cobalamin (vitamin B12), a water-soluble vitamin characterized by possession of a corrin nucleus containing a cobalt atom.	BP	cobalamin metabolic process	0.0635728
GCA_030272055.1	GO:0009235	WIA18023.1_GCA_030272055	1	The chemical reactions and pathways involving cobalamin (vitamin B12), a water-soluble vitamin characterized by possession of a corrin nucleus containing a cobalt atom.	BP	cobalamin metabolic process	0.0261301
GCA_030272155.1	GO:0009235	WIA38313.1_GCA_030272155	1	The chemical reactions and pathways involving cobalamin (vitamin B12), a water-soluble vitamin characterized by possession of a corrin nucleus containing a cobalt atom.	BP	cobalamin metabolic process	0.0252461
SAMC4339295	GO:0031419	2_rna-gnl|WGS:LSYV|mrna.GPECTOR_6g556_R0,august_c_000000070422_split_00003-g7433.t1	2	Binding to cobalamin (vitamin B12), a water-soluble vitamin characterized by possession of a corrin nucleus containing a cobalt atom.	MF	cobalamin binding	0.0247617
SAMC4339296	GO:0031419	4_rna-gnl|OEZ86|Sobl_g24485.t1_R0,2_rna-gnl|WGS:LSYV|mrna.GPECTOR_6g556_R0	2	Binding to cobalamin (vitamin B12), a water-soluble vitamin characterized by possession of a corrin nucleus containing a cobalt atom.	MF	cobalamin binding	0.0257533
SAMC4339297	GO:0031419	2_rna-gnl|WGS:LSYV|mrna.GPECTOR_6g556_R0,august_c_000000048685_split_00002-g262.t1,august_c_000000048685_split_00003-g834.t1	3	Binding to cobalamin (vitamin B12), a water-soluble vitamin characterized by possession of a corrin nucleus containing a cobalt atom.	MF	cobalamin binding	0.0306905
SAMC4339300	GO:0031419	2_rna-gnl|WGS:LSYV|mrna.GPECTOR_6g556_R0,4_rna-gnl|OEZ86|Sobl_g24485.t1_R0	2	Binding to cobalamin (vitamin B12), a water-soluble vitamin characterized by possession of a corrin nucleus containing a cobalt atom.	MF	cobalamin binding	0.0208572
SAMC4339298	GO:0031419	august_c_000000027863_split_00005-g6943.t1,1_rna-VOLCADRAFT_87452_R1,4_rna-gnl|OEZ86|Sobl_g24485.t1_R0,2_rna-gnl|WGS:LSYV|mrna.GPECTOR_6g556_R0,august_c_000000005777_split_00001-g639.t1	5	Binding to cobalamin (vitamin B12), a water-soluble vitamin characterized by possession of a corrin nucleus containing a cobalt atom.	MF	cobalamin binding	0.0380431
SAMC4339299	GO:0031419	august_c_000000050610_split_00002-g9582.t1,2_rna-gnl|WGS:LSYV|mrna.GPECTOR_6g556_R0,august_c_000000001774_split_00001-g3847.t1	3	Binding to cobalamin (vitamin B12), a water-soluble vitamin characterized by possession of a corrin nucleus containing a cobalt atom.	MF	cobalamin binding	0.0307692
SAMC4339301	GO:0031419	2_rna-gnl|WGS:LSYV|mrna.GPECTOR_6g556_R0	1	Binding to cobalamin (vitamin B12), a water-soluble vitamin characterized by possession of a corrin nucleus containing a cobalt atom.	MF	cobalamin binding	0.0131839
GCA_000611645.1	GO:0031419	KIY99236.1_GCA_000611645	1	Binding to cobalamin (vitamin B12), a water-soluble vitamin characterized by possession of a corrin nucleus containing a cobalt atom.	MF	cobalamin binding	0.0154321
GCA_003203535.1	GO:0031419	GBF95092.1_GCA_003203535	1	Binding to cobalamin (vitamin B12), a water-soluble vitamin characterized by possession of a corrin nucleus containing a cobalt atom.	MF	cobalamin binding	0.0151676
GCA_014080715.1	GO:0031419	KAF6256563.1_GCA_014080715	1	Binding to cobalamin (vitamin B12), a water-soluble vitamin characterized by possession of a corrin nucleus containing a cobalt atom.	MF	cobalamin binding	0.0145539
GCA_014905635.1	GO:0031419	KAF8065944.1_GCA_014905635,KAF8065605.1_GCA_014905635	2	Binding to cobalamin (vitamin B12), a water-soluble vitamin characterized by possession of a corrin nucleus containing a cobalt atom.	MF	cobalamin binding	0.0345244
GCA_025201885.1	GO:0031419	KAI8465300.1_GCA_025201885	1	Binding to cobalamin (vitamin B12), a water-soluble vitamin characterized by possession of a corrin nucleus containing a cobalt atom.	MF	cobalamin binding	0.0143947
GCA_030272055.1	GO:0031419	WIA16317.1_GCA_030272055,WIA17435.1_GCA_030272055	2	Binding to cobalamin (vitamin B12), a water-soluble vitamin characterized by possession of a corrin nucleus containing a cobalt atom.	MF	cobalamin binding	0.0229148
GCA_030272155.1	GO:0031419	WIA37591.1_GCA_030272155,WIA36514.1_GCA_030272155	2	Binding to cobalamin (vitamin B12), a water-soluble vitamin characterized by possession of a corrin nucleus containing a cobalt atom.	MF	cobalamin binding	0.0221582

## Sheet: Table S5
species	GO_ID	Gene	Count	DEFINITION	Ontology	Term	Percentage
SAMC4339295	GO:0003341	august_c_000000089006_split_00003-g4122.t1,august_c_000000057502_split_00001-g7522.t1,august_c_000000136088_split_00001-g9669.t1,august_c_000000027892_split_00001-g379.t1,3_rna-gnl|WGS:JASKMD|H.pluvialis_11542_R0	5	The directed, self-propelled movement of a cilium.	BP	cilium movement	0.0994431
SAMC4339296	GO:0003341	august_c_000000025620_split_00003-g1377.t1,august_c_000000002350_split_00002-g11030.t1,4_rna-gnl|OEZ86|Sobl_g01161.t1_R0,august_c_000000019212_split_00003-g2164.t1,august_c_000000002350_split_00001-g11040.t1	5	The directed, self-propelled movement of a cilium.	BP	cilium movement	0.104275
SAMC4339297	GO:0003341	4_rna-gnl|OEZ86|Sobl_g20747.t1_R0,2_rna-gnl|WGS:LSYV|mrna.GPECTOR_14g144_R0,august_c_000000035655_split_00011-g17675.t1,august_c_000000035655_split_00012-g10540.t1	4	The directed, self-propelled movement of a cilium.	BP	cilium movement	0.0174095
SAMC4339300	GO:0003341	august_c_000000035922_split_00001-g4523.t1,4_rna-gnl|OEZ86|Sobl_g01161.t1_R0,4_rna-gnl|OEZ86|Sobl_g19063.t1_R0,august_c_000000051603_split_00001-g15180.t1	4	The directed, self-propelled movement of a cilium.	BP	cilium movement	0.0675562
SAMC4339298	GO:0003341	4_rna-gnl|OEZ86|Sobl_g20747.t1_R0,4_rna-gnl|OEZ86|Sobl_g01161.t1_R0,2_rna-gnl|WGS:LSYV|mrna.GPECTOR_14g144_R0	3	The directed, self-propelled movement of a cilium.	BP	cilium movement	0.0395778
SAMC4339299	GO:0003341	august_c_000000034465_split_00005-g75.t1,4_rna-gnl|OEZ86|Sobl_g20747.t1_R0,4_rna-gnl|OEZ86|Sobl_g01161.t1_R0,august_c_000000014488_split_00007-g4593.t1,august_c_000000014488_split_00006-g2599.t1	5	The directed, self-propelled movement of a cilium.	BP	cilium movement	0.087184
SAMC4339301	GO:0003341	4_rna-gnl|OEZ86|Sobl_g20747.t1_R0,4_rna-gnl|OEZ86|Sobl_g01161.t1_R0,august_c_000000014883_split_00001-g547.t1	3	The directed, self-propelled movement of a cilium.	BP	cilium movement	0.0625521
SAMC4339295	GO:0003352	4_rna-gnl|OEZ86|Sobl_g27408.t1_R0	1	Any process that modulates the rate, frequency, or extent of cilium movement, the directed, self-propelled movement of a cilium.	BP	regulation of cilium movement	0.0198886
SAMC4339296	GO:0003352	2_rna-gnl|WGS:LSYV|mrna.GPECTOR_39g388_R0	1	Any process that modulates the rate, frequency, or extent of cilium movement, the directed, self-propelled movement of a cilium.	BP	regulation of cilium movement	0.0208551
SAMC4339297	GO:0003352	4_rna-gnl|OEZ86|Sobl_g27408.t1_R0	1	Any process that modulates the rate, frequency, or extent of cilium movement, the directed, self-propelled movement of a cilium.	BP	regulation of cilium movement	0.0348189
SAMC4339300	GO:0003352	4_rna-gnl|OEZ86|Sobl_g27408.t1_R0	1	Any process that modulates the rate, frequency, or extent of cilium movement, the directed, self-propelled movement of a cilium.	BP	regulation of cilium movement	0.016889
SAMC4339298	GO:0003352	4_rna-gnl|OEZ86|Sobl_g27408.t1_R0	1	Any process that modulates the rate, frequency, or extent of cilium movement, the directed, self-propelled movement of a cilium.	BP	regulation of cilium movement	0.0131926
SAMC4339299	GO:0003352	4_rna-gnl|OEZ86|Sobl_g27408.t1_R0	1	Any process that modulates the rate, frequency, or extent of cilium movement, the directed, self-propelled movement of a cilium.	BP	regulation of cilium movement	0.0174368
SAMC4339301	GO:0003352	4_rna-gnl|OEZ86|Sobl_g27408.t1_R0	1	Any process that modulates the rate, frequency, or extent of cilium movement, the directed, self-propelled movement of a cilium.	BP	regulation of cilium movement	0.0208507
GCA_000611645.1	GO:0003352	KIZ02636.1_GCA_000611645	1	Any process that modulates the rate, frequency, or extent of cilium movement, the directed, self-propelled movement of a cilium.	BP	regulation of cilium movement	0.0335345
GCA_003203535.1	GO:0003352	GBF94463.1_GCA_003203535	1	Any process that modulates the rate, frequency, or extent of cilium movement, the directed, self-propelled movement of a cilium.	BP	regulation of cilium movement	0.0337154
GCA_014080715.1	GO:0003352	KAF6251199.1_GCA_014080715	1	Any process that modulates the rate, frequency, or extent of cilium movement, the directed, self-propelled movement of a cilium.	BP	regulation of cilium movement	0.0334672
GCA_014905635.1	GO:0003352	KAF8067412.1_GCA_014905635	1	Any process that modulates the rate, frequency, or extent of cilium movement, the directed, self-propelled movement of a cilium.	BP	regulation of cilium movement	0.0369549
GCA_025201885.1	GO:0003352	KAI8472562.1_GCA_025201885	1	Any process that modulates the rate, frequency, or extent of cilium movement, the directed, self-propelled movement of a cilium.	BP	regulation of cilium movement	0.0317864
GCA_030272055.1	GO:0003352	WIA13127.1_GCA_030272055	1	Any process that modulates the rate, frequency, or extent of cilium movement, the directed, self-propelled movement of a cilium.	BP	regulation of cilium movement	0.0261301
GCA_030272155.1	GO:0003352	WIA33272.1_GCA_030272155	1	Any process that modulates the rate, frequency, or extent of cilium movement, the directed, self-propelled movement of a cilium.	BP	regulation of cilium movement	0.0252461
SAMC4339295	GO:0005929	august_c_000000153171_split_00001-g14983.t1,3_rna-gnl|WGS:JASKMD|H.pluvialis_11542_R0	2	A specialized eukaryotic organelle that consists of a filiform extrusion of the cell surface and of some cytoplasmic parts. Each cilium is largely bounded by an extrusion of the cytoplasmic (plasma) membrane, and contains a regular longitudinal array of microtubules, anchored to a basal body.	CC	cilium	0.117578
SAMC4339296	GO:0005929	4_rna-gnl|OEZ86|Sobl_g05150.t1_R0,august_c_000000025620_split_00003-g1377.t1	2	A specialized eukaryotic organelle that consists of a filiform extrusion of the cell surface and of some cytoplasmic parts. Each cilium is largely bounded by an extrusion of the cytoplasmic (plasma) membrane, and contains a regular longitudinal array of microtubules, anchored to a basal body.	CC	cilium	0.120265
SAMC4339297	GO:0005929	4_rna-gnl|OEZ86|Sobl_g05150.t1_R0,4_rna-gnl|OEZ86|Sobl_g20747.t1_R0	2	A specialized eukaryotic organelle that consists of a filiform extrusion of the cell surface and of some cytoplasmic parts. Each cilium is largely bounded by an extrusion of the cytoplasmic (plasma) membrane, and contains a regular longitudinal array of microtubules, anchored to a basal body.	CC	cilium	0.104384
SAMC4339300	GO:0005929	august_c_000000035922_split_00001-g4523.t1,4_rna-gnl|OEZ86|Sobl_g19063.t1_R0	2	A specialized eukaryotic organelle that consists of a filiform extrusion of the cell surface and of some cytoplasmic parts. Each cilium is largely bounded by an extrusion of the cytoplasmic (plasma) membrane, and contains a regular longitudinal array of microtubules, anchored to a basal body.	CC	cilium	0.107181
SAMC4339298	GO:0005929	4_rna-gnl|OEZ86|Sobl_g05150.t1_R0,4_rna-gnl|OEZ86|Sobl_g20747.t1_R0	2	A specialized eukaryotic organelle that consists of a filiform extrusion of the cell surface and of some cytoplasmic parts. Each cilium is largely bounded by an extrusion of the cytoplasmic (plasma) membrane, and contains a regular longitudinal array of microtubules, anchored to a basal body.	CC	cilium	0.0832293
SAMC4339299	GO:0005929	4_rna-gnl|OEZ86|Sobl_g05150.t1_R0,4_rna-gnl|OEZ86|Sobl_g20747.t1_R0	2	A specialized eukaryotic organelle that consists of a filiform extrusion of the cell surface and of some cytoplasmic parts. Each cilium is largely bounded by an extrusion of the cytoplasmic (plasma) membrane, and contains a regular longitudinal array of microtubules, anchored to a basal body.	CC	cilium	0.103199
SAMC4339301	GO:0005929	4_rna-gnl|OEZ86|Sobl_g05150.t1_R0,4_rna-gnl|OEZ86|Sobl_g20747.t1_R0	2	A specialized eukaryotic organelle that consists of a filiform extrusion of the cell surface and of some cytoplasmic parts. Each cilium is largely bounded by an extrusion of the cytoplasmic (plasma) membrane, and contains a regular longitudinal array of microtubules, anchored to a basal body.	CC	cilium	0.121507
SAMC4339295	GO:0031514	4_rna-gnl|OEZ86|Sobl_g20827.t1_R0	1	A cilium which may have a variable arrangement of axonemal microtubules and also contains molecular motors. It may beat with a whip-like pattern that promotes cell motility or transport of fluids and other cells across a cell surface, such as on epithelial cells that line the lumenal ducts of various tissues; or they may display a distinct twirling motion that directs fluid flow asymmetrically ac…	CC	motile cilium	0.0587889
SAMC4339296	GO:0031514	2_rna-gnl|WGS:LSYV|mrna.GPECTOR_29g70_R0	1	A cilium which may have a variable arrangement of axonemal microtubules and also contains molecular motors. It may beat with a whip-like pattern that promotes cell motility or transport of fluids and other cells across a cell surface, such as on epithelial cells that line the lumenal ducts of various tissues; or they may display a distinct twirling motion that directs fluid flow asymmetrically ac…	CC	motile cilium	0.0601323
SAMC4339297	GO:0031514	4_rna-gnl|OEZ86|Sobl_g20827.t1_R0	1	A cilium which may have a variable arrangement of axonemal microtubules and also contains molecular motors. It may beat with a whip-like pattern that promotes cell motility or transport of fluids and other cells across a cell surface, such as on epithelial cells that line the lumenal ducts of various tissues; or they may display a distinct twirling motion that directs fluid flow asymmetrically ac…	CC	motile cilium	0.0521921
SAMC4339300	GO:0031514	4_rna-gnl|OEZ86|Sobl_g20827.t1_R0	1	A cilium which may have a variable arrangement of axonemal microtubules and also contains molecular motors. It may beat with a whip-like pattern that promotes cell motility or transport of fluids and other cells across a cell surface, such as on epithelial cells that line the lumenal ducts of various tissues; or they may display a distinct twirling motion that directs fluid flow asymmetrically ac…	CC	motile cilium	0.0535906
SAMC4339298	GO:0031514	4_rna-gnl|OEZ86|Sobl_g20827.t1_R0	1	A cilium which may have a variable arrangement of axonemal microtubules and also contains molecular motors. It may beat with a whip-like pattern that promotes cell motility or transport of fluids and other cells across a cell surface, such as on epithelial cells that line the lumenal ducts of various tissues; or they may display a distinct twirling motion that directs fluid flow asymmetrically ac…	CC	motile cilium	0.0416146
SAMC4339299	GO:0031514	4_rna-gnl|OEZ86|Sobl_g20827.t1_R0	1	A cilium which may have a variable arrangement of axonemal microtubules and also contains molecular motors. It may beat with a whip-like pattern that promotes cell motility or transport of fluids and other cells across a cell surface, such as on epithelial cells that line the lumenal ducts of various tissues; or they may display a distinct twirling motion that directs fluid flow asymmetrically ac…	CC	motile cilium	0.0515996
SAMC4339301	GO:0031514	4_rna-gnl|OEZ86|Sobl_g20827.t1_R0	1	A cilium which may have a variable arrangement of axonemal microtubules and also contains molecular motors. It may beat with a whip-like pattern that promotes cell motility or transport of fluids and other cells across a cell surface, such as on epithelial cells that line the lumenal ducts of various tissues; or they may display a distinct twirling motion that directs fluid flow asymmetrically ac…	CC	motile cilium	0.0607533
GCA_000611645.1	GO:0031514	KIY93614.1_GCA_000611645,KIY94894.1_GCA_000611645	2	A cilium which may have a variable arrangement of axonemal microtubules and also contains molecular motors. It may beat with a whip-like pattern that promotes cell motility or transport of fluids and other cells across a cell surface, such as on epithelial cells that line the lumenal ducts of various tissues; or they may display a distinct twirling motion that directs fluid flow asymmetrically ac…	CC	motile cilium	0.218103
GCA_003203535.1	GO:0031514	GBF97614.1_GCA_003203535	1	A cilium which may have a variable arrangement of axonemal microtubules and also contains molecular motors. It may beat with a whip-like pattern that promotes cell motility or transport of fluids and other cells across a cell surface, such as on epithelial cells that line the lumenal ducts of various tissues; or they may display a distinct twirling motion that directs fluid flow asymmetrically ac…	CC	motile cilium	0.104167
GCA_014080715.1	GO:0031514	KAF6257461.1_GCA_014080715,KAF6257460.1_GCA_014080715	2	A cilium which may have a variable arrangement of axonemal microtubules and also contains molecular motors. It may beat with a whip-like pattern that promotes cell motility or transport of fluids and other cells across a cell surface, such as on epithelial cells that line the lumenal ducts of various tissues; or they may display a distinct twirling motion that directs fluid flow asymmetrically ac…	CC	motile cilium	0.215517
GCA_014905635.1	GO:0031514	KAF8068423.1_GCA_014905635	1	A cilium which may have a variable arrangement of axonemal microtubules and also contains molecular motors. It may beat with a whip-like pattern that promotes cell motility or transport of fluids and other cells across a cell surface, such as on epithelial cells that line the lumenal ducts of various tissues; or they may display a distinct twirling motion that directs fluid flow asymmetrically ac…	CC	motile cilium	0.112108
GCA_025201885.1	GO:0031514	KAI8465222.1_GCA_025201885	1	A cilium which may have a variable arrangement of axonemal microtubules and also contains molecular motors. It may beat with a whip-like pattern that promotes cell motility or transport of fluids and other cells across a cell surface, such as on epithelial cells that line the lumenal ducts of various tissues; or they may display a distinct twirling motion that directs fluid flow asymmetrically ac…	CC	motile cilium	0.1002
GCA_030272055.1	GO:0031514	WIA10544.1_GCA_030272055	1	A cilium which may have a variable arrangement of axonemal microtubules and also contains molecular motors. It may beat with a whip-like pattern that promotes cell motility or transport of fluids and other cells across a cell surface, such as on epithelial cells that line the lumenal ducts of various tissues; or they may display a distinct twirling motion that directs fluid flow asymmetrically ac…	CC	motile cilium	0.0874126
GCA_030272155.1	GO:0031514	WIA30588.1_GCA_030272155	1	A cilium which may have a variable arrangement of axonemal microtubules and also contains molecular motors. It may beat with a whip-like pattern that promotes cell motility or transport of fluids and other cells across a cell surface, such as on epithelial cells that line the lumenal ducts of various tissues; or they may display a distinct twirling motion that directs fluid flow asymmetrically ac…	CC	motile cilium	0.0863558
SAMC4339295	GO:0034464	2_rna-gnl|WGS:LSYV|mrna.GPECTOR_5g1_R0,3_rna-gnl|WGS:JASKMD|H.pluvialis_28282_R0,august_c_000000179699_split_00001-g4659.t1,3_rna-gnl|WGS:JASKMD|H.pluvialis_15123_R0,4_rna-gnl|OEZ86|Sobl_g14551.t1_R0,august_c_000000111120_split_00001-g1445.t1,4_rna-gnl|OEZ86|Sobl_g04551.t1_R0	7	A ciliary protein complex involved in cilium biogenesis. It consists of at least seven Bardet-Biedl syndrome (BBS) proteins and BBIP10. It moves in association with IFT trains through cilia (likely as an IFT-A/B adaptor or cargo), and is required for the integrity of IFT-A and IFT-B.	CC	BBSome	0.411523
SAMC4339296	GO:0034464	4_rna-gnl|OEZ86|Sobl_g04551.t1_R0,3_rna-gnl|WGS:JASKMD|H.pluvialis_28282_R0,2_rna-gnl|WGS:LSYV|mrna.GPECTOR_5g1_R0,august_c_000000021473_split_00001-g7551.t1,4_rna-gnl|OEZ86|Sobl_g19352.t1_R0,august_c_000000025494_split_00005-g8223.t1,1_rna-VOLCADRAFT_78967_R0	7	A ciliary protein complex involved in cilium biogenesis. It consists of at least seven Bardet-Biedl syndrome (BBS) proteins and BBIP10. It moves in association with IFT trains through cilia (likely as an IFT-A/B adaptor or cargo), and is required for the integrity of IFT-A and IFT-B.	CC	BBSome	0.420926
SAMC4339297	GO:0034464	4_rna-gnl|OEZ86|Sobl_g14551.t1_R0,4_rna-gnl|OEZ86|Sobl_g16033.t1_R0,4_rna-gnl|OEZ86|Sobl_g01501.t1_R1,august_c_000000018090_split_00001-g5103.t1,4_rna-gnl|OEZ86|Sobl_g04551.t1_R0,august_c_000000058323_split_00001-g1428.t1,4_rna-gnl|OEZ86|Sobl_g19352.t1_R0	7	A ciliary protein complex involved in cilium biogenesis. It consists of at least seven Bardet-Biedl syndrome (BBS) proteins and BBIP10. It moves in association with IFT trains through cilia (likely as an IFT-A/B adaptor or cargo), and is required for the integrity of IFT-A and IFT-B.	CC	BBSome	0.365344
SAMC4339300	GO:0034464	3_rna-gnl|WGS:JASKMD|H.pluvialis_28282_R0,4_rna-gnl|OEZ86|Sobl_g16033.t1_R0,4_rna-gnl|OEZ86|Sobl_g14551.t1_R0,4_rna-gnl|OEZ86|Sobl_g04551.t1_R0,august_c_000000021815_split_00001-g12904.t1,4_rna-gnl|OEZ86|Sobl_g16630.t1_R0,3_rna-gnl|WGS:JASKMD|H.pluvialis_16357_R0,august_c_000000024972_split_00002-g3381.t1,august_c_000000041989_split_00001-g6362.t1	9	A ciliary protein complex involved in cilium biogenesis. It consists of at least seven Bardet-Biedl syndrome (BBS) proteins and BBIP10. It moves in association with IFT trains through cilia (likely as an IFT-A/B adaptor or cargo), and is required for the integrity of IFT-A and IFT-B.	CC	BBSome	0.482315
SAMC4339298	GO:0034464	4_rna-gnl|OEZ86|Sobl_g19352.t1_R0,4_rna-gnl|OEZ86|Sobl_g04551.t1_R0,august_c_000000014221_split_00001-g16946.t1,august_c_000000014441_split_00006-g12509.t1,4_rna-gnl|OEZ86|Sobl_g14551.t1_R0,august_c_000000009880_split_00001-g5909.t1,4_rna-gnl|OEZ86|Sobl_g16630.t1_R1,august_c_000000012817_split_00001-g6197.t1,4_rna-gnl|OEZ86|Sobl_g01501.t2_R1,4_rna-gnl|OEZ86|Sobl_g16033.t1_R0	10	A ciliary protein complex involved in cilium biogenesis. It consists of at least seven Bardet-Biedl syndrome (BBS) proteins and BBIP10. It moves in association with IFT trains through cilia (likely as an IFT-A/B adaptor or cargo), and is required for the integrity of IFT-A and IFT-B.	CC	BBSome	0.416146
SAMC4339299	GO:0034464	1_rna-VOLCADRAFT_84205_R0,august_c_000000024052_split_00001-g16574.t1,august_c_000000024052_split_00001-g16573.t1,4_rna-gnl|OEZ86|Sobl_g14551.t1_R0,4_rna-gnl|OEZ86|Sobl_g04551.t1_R0,august_c_000000026547_split_00001-g1998.t1,august_c_000000035966_split_00002-g4302.t1,4_rna-gnl|OEZ86|Sobl_g19352.t1_R0,4_rna-gnl|OEZ86|Sobl_g16033.t1_R0	9	A ciliary protein complex involved in cilium biogenesis. It consists of at least seven Bardet-Biedl syndrome (BBS) proteins and BBIP10. It moves in association with IFT trains through cilia (likely as an IFT-A/B adaptor or cargo), and is required for the integrity of IFT-A and IFT-B.	CC	BBSome	0.464396
SAMC4339301	GO:0034464	4_rna-gnl|OEZ86|Sobl_g19352.t1_R0,4_rna-gnl|OEZ86|Sobl_g14551.t1_R0,4_rna-gnl|OEZ86|Sobl_g04551.t1_R0,4_rna-gnl|OEZ86|Sobl_g01501.t1_R0,1_rna-VOLCADRAFT_78967_R0	5	A ciliary protein complex involved in cilium biogenesis. It consists of at least seven Bardet-Biedl syndrome (BBS) proteins and BBIP10. It moves in association with IFT trains through cilia (likely as an IFT-A/B adaptor or cargo), and is required for the integrity of IFT-A and IFT-B.	CC	BBSome	0.303767
GCA_000611645.1	GO:0034464	KIY91461.1_GCA_000611645,KIY93687.1_GCA_000611645	2	A ciliary protein complex involved in cilium biogenesis. It consists of at least seven Bardet-Biedl syndrome (BBS) proteins and BBIP10. It moves in association with IFT trains through cilia (likely as an IFT-A/B adaptor or cargo), and is required for the integrity of IFT-A and IFT-B.	CC	BBSome	0.218103
GCA_003203535.1	GO:0034464	GBF88644.1_GCA_003203535,GBF99517.1_GCA_003203535	2	A ciliary protein complex involved in cilium biogenesis. It consists of at least seven Bardet-Biedl syndrome (BBS) proteins and BBIP10. It moves in association with IFT trains through cilia (likely as an IFT-A/B adaptor or cargo), and is required for the integrity of IFT-A and IFT-B.	CC	BBSome	0.208333
GCA_014080715.1	GO:0034464	KAF6258646.1_GCA_014080715,KAF6253436.1_GCA_014080715,KAF6249834.1_GCA_014080715	3	A ciliary protein complex involved in cilium biogenesis. It consists of at least seven Bardet-Biedl syndrome (BBS) proteins and BBIP10. It moves in association with IFT trains through cilia (likely as an IFT-A/B adaptor or cargo), and is required for the integrity of IFT-A and IFT-B.	CC	BBSome	0.323276
GCA_014905635.1	GO:0034464	KAF8059727.1_GCA_014905635,KAF8059191.1_GCA_014905635	2	A ciliary protein complex involved in cilium biogenesis. It consists of at least seven Bardet-Biedl syndrome (BBS) proteins and BBIP10. It moves in association with IFT trains through cilia (likely as an IFT-A/B adaptor or cargo), and is required for the integrity of IFT-A and IFT-B.	CC	BBSome	0.224215
GCA_025201885.1	GO:0034464	KAI8470367.1_GCA_025201885	1	A ciliary protein complex involved in cilium biogenesis. It consists of at least seven Bardet-Biedl syndrome (BBS) proteins and BBIP10. It moves in association with IFT trains through cilia (likely as an IFT-A/B adaptor or cargo), and is required for the integrity of IFT-A and IFT-B.	CC	BBSome	0.1002
GCA_030272055.1	GO:0034464	WIA18371.1_GCA_030272055,WIA21713.1_GCA_030272055	2	A ciliary protein complex involved in cilium biogenesis. It consists of at least seven Bardet-Biedl syndrome (BBS) proteins and BBIP10. It moves in association with IFT trains through cilia (likely as an IFT-A/B adaptor or cargo), and is required for the integrity of IFT-A and IFT-B.	CC	BBSome	0.174825
GCA_030272155.1	GO:0034464	WIA42143.1_GCA_030272155,WIA38649.1_GCA_030272155	2	A ciliary protein complex involved in cilium biogenesis. It consists of at least seven Bardet-Biedl syndrome (BBS) proteins and BBIP10. It moves in association with IFT trains through cilia (likely as an IFT-A/B adaptor or cargo), and is required for the integrity of IFT-A and IFT-B.	CC	BBSome	0.172712
SAMC4339295	GO:0035721	august_c_000000091161_split_00002-g12486.t1,august_c_000000091161_split_00001-g11989.t1,1_rna-VOLCADRAFT_92778_R0	3	The directed movement of large protein complexes along microtubules from the tip of a cilium (also called flagellum) toward the cell body, mediated by motor proteins.	BP	intraciliary retrograde transport	0.0596659
SAMC4339296	GO:0035721	august_c_000000025070_split_00007-g9899.t1,2_rna-gnl|WGS:LSYV|mrna.GPECTOR_27g622_R0	2	The directed movement of large protein complexes along microtubules from the tip of a cilium (also called flagellum) toward the cell body, mediated by motor proteins.	BP	intraciliary retrograde transport	0.0417101
SAMC4339297	GO:0035721	august_c_000000027607_split_00001-g3900.t1,august_c_000000012084_split_00003-g4453.t1,4_rna-gnl|OEZ86|Sobl_g01486.t1_R0	3	The directed movement of large protein complexes along microtubules from the tip of a cilium (also called flagellum) toward the cell body, mediated by motor proteins.	BP	intraciliary retrograde transport	0.0522284
SAMC4339300	GO:0035721	3_rna-gnl|WGS:JASKMD|H.pluvialis_19271_R0,4_rna-gnl|OEZ86|Sobl_g01486.t1_R0	2	The directed movement of large protein complexes along microtubules from the tip of a cilium (also called flagellum) toward the cell body, mediated by motor proteins.	BP	intraciliary retrograde transport	0.0337781
SAMC4339298	GO:0035721	august_c_000000004793_split_00001-g21184.t1,1_rna-VOLCADRAFT_74144_R0,4_rna-gnl|OEZ86|Sobl_g01486.t1_R0	3	The directed movement of large protein complexes along microtubules from the tip of a cilium (also called flagellum) toward the cell body, mediated by motor proteins.	BP	intraciliary retrograde transport	0.0395778
SAMC4339299	GO:0035721	4_rna-gnl|OEZ86|Sobl_g16161.t1_R0,4_rna-gnl|OEZ86|Sobl_g01486.t1_R0	2	The directed movement of large protein complexes along microtubules from the tip of a cilium (also called flagellum) toward the cell body, mediated by motor proteins.	BP	intraciliary retrograde transport	0.0348736
SAMC4339301	GO:0035721	august_c_000000021801_split_00003-g9327.t1,august_c_000000007145_split_00001-g2103.t1	2	The directed movement of large protein complexes along microtubules from the tip of a cilium (also called flagellum) toward the cell body, mediated by motor proteins.	BP	intraciliary retrograde transport	0.0417014
SAMC4339295	GO:0035735	august_c_000000172174_split_00001-g9416.t1,august_c_000000167014_split_00001-g1729.t1,1_rna-VOLCADRAFT_92778_R0	3	The bidirectional movement of large protein complexes along microtubules within a cilium that contributes to cilium assembly.	BP	intraciliary transport involved in cilium assembly	0.0596659
SAMC4339296	GO:0035735	august_c_000000022936_split_00002-g2273.t1,2_rna-gnl|WGS:LSYV|mrna.GPECTOR_27g622_R0	2	The bidirectional movement of large protein complexes along microtubules within a cilium that contributes to cilium assembly.	BP	intraciliary transport involved in cilium assembly	0.0417101
SAMC4339297	GO:0035735	4_rna-gnl|OEZ86|Sobl_g04336.t1_R0,4_rna-gnl|OEZ86|Sobl_g01486.t1_R0	2	The bidirectional movement of large protein complexes along microtubules within a cilium that contributes to cilium assembly.	BP	intraciliary transport involved in cilium assembly	0.0522284
SAMC4339300	GO:0035735	4_rna-gnl|OEZ86|Sobl_g04336.t1_R0,4_rna-gnl|OEZ86|Sobl_g01486.t1_R0	2	The bidirectional movement of large protein complexes along microtubules within a cilium that contributes to cilium assembly.	BP	intraciliary transport involved in cilium assembly	0.0337781
SAMC4339298	GO:0035735	4_rna-gnl|OEZ86|Sobl_g04336.t1_R0,4_rna-gnl|OEZ86|Sobl_g01486.t1_R0	2	The bidirectional movement of large protein complexes along microtubules within a cilium that contributes to cilium assembly.	BP	intraciliary transport involved in cilium assembly	0.0263852
SAMC4339299	GO:0035735	4_rna-gnl|OEZ86|Sobl_g04336.t1_R0,4_rna-gnl|OEZ86|Sobl_g01486.t1_R0	2	The bidirectional movement of large protein complexes along microtubules within a cilium that contributes to cilium assembly.	BP	intraciliary transport involved in cilium assembly	0.0348736
SAMC4339301	GO:0035735	4_rna-gnl|OEZ86|Sobl_g04336.t1_R0,august_c_000000007145_split_00001-g2103.t1	2	The bidirectional movement of large protein complexes along microtubules within a cilium that contributes to cilium assembly.	BP	intraciliary transport involved in cilium assembly	0.0417014
SAMC4339295	GO:0036064	august_c_000000028296_split_00004-g7492.t1,4_rna-gnl|OEZ86|Sobl_g27871.t1_R0	2	A membrane-tethered, short cylindrical array of microtubules and associated proteins found at the base of a eukaryotic cilium (also called flagellum) that is similar in structure to a centriole and derives from it. The cilium basal body is the site of assembly and remodeling of the cilium and serves as a nucleation site for axoneme growth. As well as anchoring the cilium, it is thought to provide…	CC	ciliary basal body	0.117578
SAMC4339296	GO:0036064	august_c_000000027597_split_00001-g3188.t1,august_c_000000027597_split_00002-g3176.t1,4_rna-gnl|OEZ86|Sobl_g27871.t1_R0,august_c_000000011846_split_00004-g12860.t1	4	A membrane-tethered, short cylindrical array of microtubules and associated proteins found at the base of a eukaryotic cilium (also called flagellum) that is similar in structure to a centriole and derives from it. The cilium basal body is the site of assembly and remodeling of the cilium and serves as a nucleation site for axoneme growth. As well as anchoring the cilium, it is thought to provide…	CC	ciliary basal body	0.240529
SAMC4339297	GO:0036064	4_rna-gnl|OEZ86|Sobl_g27871.t1_R0	1	A membrane-tethered, short cylindrical array of microtubules and associated proteins found at the base of a eukaryotic cilium (also called flagellum) that is similar in structure to a centriole and derives from it. The cilium basal body is the site of assembly and remodeling of the cilium and serves as a nucleation site for axoneme growth. As well as anchoring the cilium, it is thought to provide…	CC	ciliary basal body	0.0521921
SAMC4339300	GO:0036064	4_rna-gnl|OEZ86|Sobl_g27871.t1_R0	1	A membrane-tethered, short cylindrical array of microtubules and associated proteins found at the base of a eukaryotic cilium (also called flagellum) that is similar in structure to a centriole and derives from it. The cilium basal body is the site of assembly and remodeling of the cilium and serves as a nucleation site for axoneme growth. As well as anchoring the cilium, it is thought to provide…	CC	ciliary basal body	0.0535906
SAMC4339298	GO:0036064	august_c_000000033729_split_00003-g20696.t1,august_c_000000033729_split_00002-g17910.t1	2	A membrane-tethered, short cylindrical array of microtubules and associated proteins found at the base of a eukaryotic cilium (also called flagellum) that is similar in structure to a centriole and derives from it. The cilium basal body is the site of assembly and remodeling of the cilium and serves as a nucleation site for axoneme growth. As well as anchoring the cilium, it is thought to provide…	CC	ciliary basal body	0.0832293
SAMC4339299	GO:0036064	august_c_000000047169_split_00003-g6576.t1,august_c_000000047169_split_00002-g835.t1	2	A membrane-tethered, short cylindrical array of microtubules and associated proteins found at the base of a eukaryotic cilium (also called flagellum) that is similar in structure to a centriole and derives from it. The cilium basal body is the site of assembly and remodeling of the cilium and serves as a nucleation site for axoneme growth. As well as anchoring the cilium, it is thought to provide…	CC	ciliary basal body	0.103199
SAMC4339301	GO:0036064	4_rna-gnl|OEZ86|Sobl_g27871.t1_R0	1	A membrane-tethered, short cylindrical array of microtubules and associated proteins found at the base of a eukaryotic cilium (also called flagellum) that is similar in structure to a centriole and derives from it. The cilium basal body is the site of assembly and remodeling of the cilium and serves as a nucleation site for axoneme growth. As well as anchoring the cilium, it is thought to provide…	CC	ciliary basal body	0.0607533
SAMC4339295	GO:0042073	4_rna-gnl|OEZ86|Sobl_g06804.t1_R0,august_c_000000024805_split_00001-g4228.t1,4_rna-gnl|OEZ86|Sobl_g20934.t1_R0,august_c_000000066324_split_00001-g10464.t1,august_c_000000165317_split_00001-g11296.t1	5	The bidirectional movement of large protein complexes along microtubules within a cilium, mediated by motor proteins.	BP	intraciliary transport	0.0994431
SAMC4339296	GO:0042073	4_rna-gnl|OEZ86|Sobl_g06804.t1_R0,august_c_000000020722_split_00006-g6277.t1,4_rna-gnl|OEZ86|Sobl_g20934.t1_R0,1_rna-VOLCADRAFT_78702_R0	4	The bidirectional movement of large protein complexes along microtubules within a cilium, mediated by motor proteins.	BP	intraciliary transport	0.0834202
SAMC4339297	GO:0042073	4_rna-gnl|OEZ86|Sobl_g06804.t1_R0,4_rna-gnl|OEZ86|Sobl_g20934.t1_R0,4_rna-gnl|OEZ86|Sobl_g01879.t1_R0	3	The bidirectional movement of large protein complexes along microtubules within a cilium, mediated by motor proteins.	BP	intraciliary transport	0.0174095
SAMC4339300	GO:0042073	4_rna-gnl|OEZ86|Sobl_g06804.t1_R0,4_rna-gnl|OEZ86|Sobl_g20934.t1_R0,4_rna-gnl|OEZ86|Sobl_g01879.t1_R0	3	The bidirectional movement of large protein complexes along microtubules within a cilium, mediated by motor proteins.	BP	intraciliary transport	0.0506671
SAMC4339298	GO:0042073	4_rna-gnl|OEZ86|Sobl_g06804.t1_R0,4_rna-gnl|OEZ86|Sobl_g20934.t1_R0,1_rna-VOLCADRAFT_78702_R0	3	The bidirectional movement of large protein complexes along microtubules within a cilium, mediated by motor proteins.	BP	intraciliary transport	0.0395778
SAMC4339299	GO:0042073	4_rna-gnl|OEZ86|Sobl_g06804.t1_R0,4_rna-gnl|OEZ86|Sobl_g20934.t1_R0,august_c_000000024502_split_00005-g13150.t1,august_c_000000024502_split_00004-g3039.t1	4	The bidirectional movement of large protein complexes along microtubules within a cilium, mediated by motor proteins.	BP	intraciliary transport	0.0697472
SAMC4339301	GO:0042073	1_rna-VOLCADRAFT_74462_R0,4_rna-gnl|OEZ86|Sobl_g20934.t1_R0,4_rna-gnl|OEZ86|Sobl_g01879.t1_R0	3	The bidirectional movement of large protein complexes along microtubules within a cilium, mediated by motor proteins.	BP	intraciliary transport	0.0625521
GCA_003203535.1	GO:0042073	GBF95657.1_GCA_003203535	1	The bidirectional movement of large protein complexes along microtubules within a cilium, mediated by motor proteins.	BP	intraciliary transport	0.0337154
GCA_014080715.1	GO:0042073	KAF6262027.1_GCA_014080715	1	The bidirectional movement of large protein complexes along microtubules within a cilium, mediated by motor proteins.	BP	intraciliary transport	0.0334672
GCA_014905635.1	GO:0042073	KAF8062670.1_GCA_014905635	1	The bidirectional movement of large protein complexes along microtubules within a cilium, mediated by motor proteins.	BP	intraciliary transport	0.0369549
GCA_025201885.1	GO:0042073	KAI8467716.1_GCA_025201885	1	The bidirectional movement of large protein complexes along microtubules within a cilium, mediated by motor proteins.	BP	intraciliary transport	0.0317864
GCA_030272055.1	GO:0042073	WIA20887.1_GCA_030272055	1	The bidirectional movement of large protein complexes along microtubules within a cilium, mediated by motor proteins.	BP	intraciliary transport	0.0261301
GCA_030272155.1	GO:0042073	WIA41187.1_GCA_030272155	1	The bidirectional movement of large protein complexes along microtubules within a cilium, mediated by motor proteins.	BP	intraciliary transport	0.0252461
SAMC4339295	GO:0044782	4_rna-gnl|OEZ86|Sobl_g27871.t1_R0	1	A process that is carried out at the cellular level which results in the assembly, arrangement of constituent parts, or disassembly of a cilium, a specialized eukaryotic organelle that consists of a filiform extrusion of the cell surface. Each cilium is bounded by an extrusion of the cytoplasmic membrane, and contains a regular longitudinal array of microtubules, anchored basally in a centriole.	BP	cilium organization	0.0198886
SAMC4339296	GO:0044782	4_rna-gnl|OEZ86|Sobl_g27871.t1_R0,august_c_000000011846_split_00004-g12860.t1	2	A process that is carried out at the cellular level which results in the assembly, arrangement of constituent parts, or disassembly of a cilium, a specialized eukaryotic organelle that consists of a filiform extrusion of the cell surface. Each cilium is bounded by an extrusion of the cytoplasmic membrane, and contains a regular longitudinal array of microtubules, anchored basally in a centriole.	BP	cilium organization	0.0417101
SAMC4339297	GO:0044782	4_rna-gnl|OEZ86|Sobl_g27871.t1_R0	1	A process that is carried out at the cellular level which results in the assembly, arrangement of constituent parts, or disassembly of a cilium, a specialized eukaryotic organelle that consists of a filiform extrusion of the cell surface. Each cilium is bounded by an extrusion of the cytoplasmic membrane, and contains a regular longitudinal array of microtubules, anchored basally in a centriole.	BP	cilium organization	0.0174095
SAMC4339300	GO:0044782	4_rna-gnl|OEZ86|Sobl_g27871.t1_R0	1	A process that is carried out at the cellular level which results in the assembly, arrangement of constituent parts, or disassembly of a cilium, a specialized eukaryotic organelle that consists of a filiform extrusion of the cell surface. Each cilium is bounded by an extrusion of the cytoplasmic membrane, and contains a regular longitudinal array of microtubules, anchored basally in a centriole.	BP	cilium organization	0.016889
SAMC4339298	GO:0044782	august_c_000000033729_split_00003-g20696.t1,august_c_000000033729_split_00002-g17910.t1	2	A process that is carried out at the cellular level which results in the assembly, arrangement of constituent parts, or disassembly of a cilium, a specialized eukaryotic organelle that consists of a filiform extrusion of the cell surface. Each cilium is bounded by an extrusion of the cytoplasmic membrane, and contains a regular longitudinal array of microtubules, anchored basally in a centriole.	BP	cilium organization	0.0263852
SAMC4339299	GO:0044782	august_c_000000047169_split_00003-g6576.t1,august_c_000000047169_split_00002-g835.t1	2	A process that is carried out at the cellular level which results in the assembly, arrangement of constituent parts, or disassembly of a cilium, a specialized eukaryotic organelle that consists of a filiform extrusion of the cell surface. Each cilium is bounded by an extrusion of the cytoplasmic membrane, and contains a regular longitudinal array of microtubules, anchored basally in a centriole.	BP	cilium organization	0.0348736
SAMC4339301	GO:0044782	4_rna-gnl|OEZ86|Sobl_g27871.t1_R0	1	A process that is carried out at the cellular level which results in the assembly, arrangement of constituent parts, or disassembly of a cilium, a specialized eukaryotic organelle that consists of a filiform extrusion of the cell surface. Each cilium is bounded by an extrusion of the cytoplasmic membrane, and contains a regular longitudinal array of microtubules, anchored basally in a centriole.	BP	cilium organization	0.0208507
SAMC4339295	GO:0060271	august_c_000000100147_split_00001-g15178.t1,august_c_000000045626_split_00001-g1015.t1,august_c_000000069891_split_00001-g13367.t1,august_c_000000074053_split_00001-g14284.t1,august_c_000000089006_split_00003-g4122.t1,august_c_000000028296_split_00004-g7492.t1,august_c_000000057502_split_00001-g7522.t1,2_rna-gnl|WGS:LSYV|mrna.GPECTOR_46g264_R0,4_rna-gnl|OEZ86|Sobl_g14551.t1_R0,august_c_0000000533…	17	The assembly of a cilium, a specialized eukaryotic organelle that consists of a filiform extrusion of the cell surface. Each cilium is bounded by an extrusion of the cytoplasmic membrane, and contains a regular longitudinal array of microtubules, anchored basally in a centriole.	BP	cilium assembly	0.338107
SAMC4339296	GO:0060271	august_c_000000022970_split_00001-g3127.t1,august_c_000000022970_split_00002-g3118.t1,4_rna-gnl|OEZ86|Sobl_g07424.t1_R0,4_rna-gnl|OEZ86|Sobl_g01161.t1_R0,august_c_000000027597_split_00001-g3188.t1,august_c_000000027597_split_00002-g3176.t1,4_rna-gnl|OEZ86|Sobl_g07617.t1_R0,august_c_000000025494_split_00005-g8223.t1,august_c_000000025620_split_00003-g1377.t1,august_c_000000002535_split_00001-g1270…	13	The assembly of a cilium, a specialized eukaryotic organelle that consists of a filiform extrusion of the cell surface. Each cilium is bounded by an extrusion of the cytoplasmic membrane, and contains a regular longitudinal array of microtubules, anchored basally in a centriole.	BP	cilium assembly	0.271116
SAMC4339297	GO:0060271	4_rna-gnl|OEZ86|Sobl_g14892.t1_R0,4_rna-gnl|OEZ86|Sobl_g14551.t1_R0,4_rna-gnl|OEZ86|Sobl_g07424.t1_R0,august_c_000000035655_split_00011-g17675.t1,august_c_000000035655_split_00012-g10540.t1,4_rna-gnl|OEZ86|Sobl_g07617.t1_R0,4_rna-gnl|OEZ86|Sobl_g20747.t1_R0,august_c_000000050500_split_00001-g15162.t1,4_rna-gnl|OEZ86|Sobl_g19107.t1_R0,4_rna-gnl|OEZ86|Sobl_g01879.t1_R0,4_rna-gnl|OEZ86|Sobl_g20934.t…	11	The assembly of a cilium, a specialized eukaryotic organelle that consists of a filiform extrusion of the cell surface. Each cilium is bounded by an extrusion of the cytoplasmic membrane, and contains a regular longitudinal array of microtubules, anchored basally in a centriole.	BP	cilium assembly	0.0174095
SAMC4339300	GO:0060271	3_rna-gnl|WGS:JASKMD|H.pluvialis_22582_R0,4_rna-gnl|OEZ86|Sobl_g01161.t1_R0,2_rna-gnl|WGS:LSYV|mrna.GPECTOR_46g264_R0,4_rna-gnl|OEZ86|Sobl_g14551.t1_R0,4_rna-gnl|OEZ86|Sobl_g07617.t1_R0,august_c_000000035922_split_00001-g4523.t1,4_rna-gnl|OEZ86|Sobl_g14392.t1_R0,4_rna-gnl|OEZ86|Sobl_g19107.t1_R0,4_rna-gnl|OEZ86|Sobl_g20934.t1_R0,4_rna-gnl|OEZ86|Sobl_g01879.t1_R0	10	The assembly of a cilium, a specialized eukaryotic organelle that consists of a filiform extrusion of the cell surface. Each cilium is bounded by an extrusion of the cytoplasmic membrane, and contains a regular longitudinal array of microtubules, anchored basally in a centriole.	BP	cilium assembly	0.16889
SAMC4339298	GO:0060271	4_rna-gnl|OEZ86|Sobl_g14892.t1_R0,4_rna-gnl|OEZ86|Sobl_g07617.t1_R0,4_rna-gnl|OEZ86|Sobl_g14551.t1_R0,4_rna-gnl|OEZ86|Sobl_g01161.t1_R0,4_rna-gnl|OEZ86|Sobl_g07424.t1_R0,august_c_000000008554_split_00004-g12383.t1,4_rna-gnl|OEZ86|Sobl_g20747.t1_R0,4_rna-gnl|OEZ86|Sobl_g14392.t1_R0,4_rna-gnl|OEZ86|Sobl_g20934.t1_R0,1_rna-VOLCADRAFT_78702_R0	10	The assembly of a cilium, a specialized eukaryotic organelle that consists of a filiform extrusion of the cell surface. Each cilium is bounded by an extrusion of the cytoplasmic membrane, and contains a regular longitudinal array of microtubules, anchored basally in a centriole.	BP	cilium assembly	0.131926
SAMC4339299	GO:0060271	4_rna-gnl|OEZ86|Sobl_g14892.t1_R0,4_rna-gnl|OEZ86|Sobl_g14551.t1_R0,4_rna-gnl|OEZ86|Sobl_g01161.t1_R0,4_rna-gnl|OEZ86|Sobl_g07617.t1_R0,4_rna-gnl|OEZ86|Sobl_g07424.t1_R0,4_rna-gnl|OEZ86|Sobl_g20747.t1_R0,4_rna-gnl|OEZ86|Sobl_g14392.t1_R0,4_rna-gnl|OEZ86|Sobl_g19107.t1_R0,4_rna-gnl|OEZ86|Sobl_g20934.t1_R0,august_c_000000024502_split_00005-g13150.t1,august_c_000000024502_split_00004-g3039.t1	11	The assembly of a cilium, a specialized eukaryotic organelle that consists of a filiform extrusion of the cell surface. Each cilium is bounded by an extrusion of the cytoplasmic membrane, and contains a regular longitudinal array of microtubules, anchored basally in a centriole.	BP	cilium assembly	0.191805
SAMC4339301	GO:0060271	3_rna-gnl|WGS:JASKMD|H.pluvialis_22582_R0,4_rna-gnl|OEZ86|Sobl_g07617.t1_R0,4_rna-gnl|OEZ86|Sobl_g14551.t1_R0,4_rna-gnl|OEZ86|Sobl_g07424.t1_R0,4_rna-gnl|OEZ86|Sobl_g01161.t1_R0,4_rna-gnl|OEZ86|Sobl_g14392.t1_R0,4_rna-gnl|OEZ86|Sobl_g20747.t1_R0,4_rna-gnl|OEZ86|Sobl_g19107.t1_R0,4_rna-gnl|OEZ86|Sobl_g20934.t1_R0,4_rna-gnl|OEZ86|Sobl_g01879.t1_R0	10	The assembly of a cilium, a specialized eukaryotic organelle that consists of a filiform extrusion of the cell surface. Each cilium is bounded by an extrusion of the cytoplasmic membrane, and contains a regular longitudinal array of microtubules, anchored basally in a centriole.	BP	cilium assembly	0.208507
GCA_000611645.1	GO:0060271	KIY92883.1_GCA_000611645,KIY94956.1_GCA_000611645,KIZ06887.1_GCA_000611645	3	The assembly of a cilium, a specialized eukaryotic organelle that consists of a filiform extrusion of the cell surface. Each cilium is bounded by an extrusion of the cytoplasmic membrane, and contains a regular longitudinal array of microtubules, anchored basally in a centriole.	BP	cilium assembly	0.100604
GCA_003203535.1	GO:0060271	GBF95222.1_GCA_003203535,GBF99225.1_GCA_003203535,GBF99517.1_GCA_003203535	3	The assembly of a cilium, a specialized eukaryotic organelle that consists of a filiform extrusion of the cell surface. Each cilium is bounded by an extrusion of the cytoplasmic membrane, and contains a regular longitudinal array of microtubules, anchored basally in a centriole.	BP	cilium assembly	0.101146
GCA_014080715.1	GO:0060271	KAF6257354.1_GCA_014080715,KAF6253436.1_GCA_014080715,KAF6253318.1_GCA_014080715	3	The assembly of a cilium, a specialized eukaryotic organelle that consists of a filiform extrusion of the cell surface. Each cilium is bounded by an extrusion of the cytoplasmic membrane, and contains a regular longitudinal array of microtubules, anchored basally in a centriole.	BP	cilium assembly	0.100402
GCA_014905635.1	GO:0060271	KAF8066356.1_GCA_014905635,KAF8059727.1_GCA_014905635,KAF8056114.1_GCA_014905635	3	The assembly of a cilium, a specialized eukaryotic organelle that consists of a filiform extrusion of the cell surface. Each cilium is bounded by an extrusion of the cytoplasmic membrane, and contains a regular longitudinal array of microtubules, anchored basally in a centriole.	BP	cilium assembly	0.110865
GCA_025201885.1	GO:0060271	KAI8464163.1_GCA_025201885,KAI8463954.1_GCA_025201885	2	The assembly of a cilium, a specialized eukaryotic organelle that consists of a filiform extrusion of the cell surface. Each cilium is bounded by an extrusion of the cytoplasmic membrane, and contains a regular longitudinal array of microtubules, anchored basally in a centriole.	BP	cilium assembly	0.0635728
GCA_030272055.1	GO:0060271	WIA21713.1_GCA_030272055,WIA22916.1_GCA_030272055,WIA23147.1_GCA_030272055	3	The assembly of a cilium, a specialized eukaryotic organelle that consists of a filiform extrusion of the cell surface. Each cilium is bounded by an extrusion of the cytoplasmic membrane, and contains a regular longitudinal array of microtubules, anchored basally in a centriole.	BP	cilium assembly	0.0783904
GCA_030272155.1	GO:0060271	WIA43599.1_GCA_030272155,WIA43363.1_GCA_030272155,WIA42143.1_GCA_030272155	3	The assembly of a cilium, a specialized eukaryotic organelle that consists of a filiform extrusion of the cell surface. Each cilium is bounded by an extrusion of the cytoplasmic membrane, and contains a regular longitudinal array of microtubules, anchored basally in a centriole.	BP	cilium assembly	0.0757384
SAMC4339295	GO:0060285	august_c_000000138505_split_00001-g15195.t1,2_rna-gnl|WGS:LSYV|mrna.GPECTOR_96g745_R2,3_rna-gnl|WGS:JASKMD|H.pluvialis_00932_R2	3	Cell motility due to the motion of one or more eukaryotic cilia. A eukaryotic cilium is a specialized organelle that consists of a filiform extrusion of the cell surface. Each cilium is bounded by an extrusion of the cytoplasmic (plasma) membrane, and contains a regular longitudinal array of microtubules, anchored basally in a centriole.	BP	cilium-dependent cell motility	0.0596659
SAMC4339296	GO:0060285	august_c_000000012416_split_00004-g11071.t1,3_rna-gnl|WGS:JASKMD|H.pluvialis_21895_R1,august_c_000000012416_split_00003-g11075.t1	3	Cell motility due to the motion of one or more eukaryotic cilia. A eukaryotic cilium is a specialized organelle that consists of a filiform extrusion of the cell surface. Each cilium is bounded by an extrusion of the cytoplasmic (plasma) membrane, and contains a regular longitudinal array of microtubules, anchored basally in a centriole.	BP	cilium-dependent cell motility	0.0625652
SAMC4339297	GO:0060285	august_c_000000048801_split_00003-g19052.t1,1_rna-VOLCADRAFT_74236_R2	2	Cell motility due to the motion of one or more eukaryotic cilia. A eukaryotic cilium is a specialized organelle that consists of a filiform extrusion of the cell surface. Each cilium is bounded by an extrusion of the cytoplasmic (plasma) membrane, and contains a regular longitudinal array of microtubules, anchored basally in a centriole.	BP	cilium-dependent cell motility	0.0522284
SAMC4339300	GO:0060285	august_c_000000057506_split_00002-g14781.t1,2_rna-gnl|WGS:LSYV|mrna.GPECTOR_96g745_R4,august_c_000000055610_split_00001-g958.t1	3	Cell motility due to the motion of one or more eukaryotic cilia. A eukaryotic cilium is a specialized organelle that consists of a filiform extrusion of the cell surface. Each cilium is bounded by an extrusion of the cytoplasmic (plasma) membrane, and contains a regular longitudinal array of microtubules, anchored basally in a centriole.	BP	cilium-dependent cell motility	0.0506671
SAMC4339298	GO:0060285	august_c_000000016406_split_00001-g1594.t1,august_c_000000023143_split_00001-g10109.t1,august_c_000000034340_split_00001-g15091.t1,3_rna-gnl|WGS:JASKMD|H.pluvialis_11025_R4	4	Cell motility due to the motion of one or more eukaryotic cilia. A eukaryotic cilium is a specialized organelle that consists of a filiform extrusion of the cell surface. Each cilium is bounded by an extrusion of the cytoplasmic (plasma) membrane, and contains a regular longitudinal array of microtubules, anchored basally in a centriole.	BP	cilium-dependent cell motility	0.0527704
SAMC4339299	GO:0060285	august_c_000000003280_split_00001-g10315.t1	1	Cell motility due to the motion of one or more eukaryotic cilia. A eukaryotic cilium is a specialized organelle that consists of a filiform extrusion of the cell surface. Each cilium is bounded by an extrusion of the cytoplasmic (plasma) membrane, and contains a regular longitudinal array of microtubules, anchored basally in a centriole.	BP	cilium-dependent cell motility	0.0174368
SAMC4339301	GO:0060285	august_c_000000013137_split_00003-g9274.t1	1	Cell motility due to the motion of one or more eukaryotic cilia. A eukaryotic cilium is a specialized organelle that consists of a filiform extrusion of the cell surface. Each cilium is bounded by an extrusion of the cytoplasmic (plasma) membrane, and contains a regular longitudinal array of microtubules, anchored basally in a centriole.	BP	cilium-dependent cell motility	0.0208507
SAMC4339295	GO:0060294	august_c_000000065627_split_00001-g12657.t1,august_c_000000017463_split_00003-g5614.t1,august_c_000000017463_split_00002-g5622.t1,2_rna-gnl|WGS:LSYV|mrna.GPECTOR_46g264_R0	4	Movement of cilia mediated by motor proteins that contributes to the movement of a cell.	BP	cilium movement involved in cell motility	0.0795545
SAMC4339296	GO:0060294	august_c_000000025620_split_00016-g1305.t1,august_c_000000027799_split_00002-g10511.t1,august_c_000000027799_split_00003-g10505.t1,4_rna-gnl|OEZ86|Sobl_g07424.t1_R0	4	Movement of cilia mediated by motor proteins that contributes to the movement of a cell.	BP	cilium movement involved in cell motility	0.0834202
SAMC4339297	GO:0060294	august_c_000000067326_split_00004-g7510.t1,4_rna-gnl|OEZ86|Sobl_g07424.t1_R0	2	Movement of cilia mediated by motor proteins that contributes to the movement of a cell.	BP	cilium movement involved in cell motility	0.226323
SAMC4339300	GO:0060294	4_rna-gnl|OEZ86|Sobl_g07120.t1_R0,2_rna-gnl|WGS:LSYV|mrna.GPECTOR_46g264_R0	2	Movement of cilia mediated by motor proteins that contributes to the movement of a cell.	BP	cilium movement involved in cell motility	0.0337781
SAMC4339298	GO:0060294	1_rna-VOLCADRAFT_68705_R0,4_rna-gnl|OEZ86|Sobl_g07120.t1_R0,4_rna-gnl|OEZ86|Sobl_g07424.t1_R0	3	Movement of cilia mediated by motor proteins that contributes to the movement of a cell.	BP	cilium movement involved in cell motility	0.0395778
SAMC4339299	GO:0060294	august_c_000000040841_split_00003-g14064.t1,4_rna-gnl|OEZ86|Sobl_g07424.t1_R0	2	Movement of cilia mediated by motor proteins that contributes to the movement of a cell.	BP	cilium movement involved in cell motility	0.0348736
SAMC4339301	GO:0060294	august_c_000000001489_split_00001-g1328.t1,4_rna-gnl|OEZ86|Sobl_g07120.t1_R0,4_rna-gnl|OEZ86|Sobl_g07424.t1_R0	3	Movement of cilia mediated by motor proteins that contributes to the movement of a cell.	BP	cilium movement involved in cell motility	0.0625521
GCA_000611645.1	GO:0060294	KIZ06887.1_GCA_000611645	1	Movement of cilia mediated by motor proteins that contributes to the movement of a cell.	BP	cilium movement involved in cell motility	0.0335345
GCA_003203535.1	GO:0060294	GBF99225.1_GCA_003203535	1	Movement of cilia mediated by motor proteins that contributes to the movement of a cell.	BP	cilium movement involved in cell motility	0.0337154
GCA_014080715.1	GO:0060294	KAF6253318.1_GCA_014080715	1	Movement of cilia mediated by motor proteins that contributes to the movement of a cell.	BP	cilium movement involved in cell motility	0.0334672
GCA_014905635.1	GO:0060294	KAF8066356.1_GCA_014905635	1	Movement of cilia mediated by motor proteins that contributes to the movement of a cell.	BP	cilium movement involved in cell motility	0.0369549
GCA_025201885.1	GO:0060294	KAI8464163.1_GCA_025201885	1	Movement of cilia mediated by motor proteins that contributes to the movement of a cell.	BP	cilium movement involved in cell motility	0.0317864
GCA_030272055.1	GO:0060294	WIA22916.1_GCA_030272055	1	Movement of cilia mediated by motor proteins that contributes to the movement of a cell.	BP	cilium movement involved in cell motility	0.0261301
GCA_030272155.1	GO:0060294	WIA43363.1_GCA_030272155	1	Movement of cilia mediated by motor proteins that contributes to the movement of a cell.	BP	cilium movement involved in cell motility	0.0252461
SAMC4339295	GO:0097730	august_c_000000015618_split_00001-g5703.t1,august_c_000000026921_split_00001-g3842.t1	2	A cilium which may have a variable array of axonemal microtubules but does not contain molecular motors.	CC	non-motile cilium	0.117578
SAMC4339296	GO:0097730	2_rna-gnl|WGS:LSYV|mrna.GPECTOR_13g747_R0	1	A cilium which may have a variable array of axonemal microtubules but does not contain molecular motors.	CC	non-motile cilium	0.0601323
SAMC4339297	GO:0097730	4_rna-gnl|OEZ86|Sobl_g14913.t1_R0	1	A cilium which may have a variable array of axonemal microtubules but does not contain molecular motors.	CC	non-motile cilium	0.0521921
SAMC4339300	GO:0097730	2_rna-gnl|WGS:LSYV|mrna.GPECTOR_13g747_R0	1	A cilium which may have a variable array of axonemal microtubules but does not contain molecular motors.	CC	non-motile cilium	0.0535906
SAMC4339298	GO:0097730	2_rna-gnl|WGS:LSYV|mrna.GPECTOR_13g747_R0	1	A cilium which may have a variable array of axonemal microtubules but does not contain molecular motors.	CC	non-motile cilium	0.0416146
SAMC4339299	GO:0097730	4_rna-gnl|OEZ86|Sobl_g14913.t1_R0	1	A cilium which may have a variable array of axonemal microtubules but does not contain molecular motors.	CC	non-motile cilium	0.0515996
SAMC4339301	GO:0097730	august_c_000000000627_split_00001-g1618.t1	1	A cilium which may have a variable array of axonemal microtubules but does not contain molecular motors.	CC	non-motile cilium	0.0607533

## Sheet: Table S6
species	GO_ID	Gene	Count	DEFINITION	Ontology	Term	Percentage
SAMC4339295	GO:0000796	4_rna-gnl|OEZ86|Sobl_g07447.t1_R0,4_rna-gnl|OEZ86|Sobl_g04417.t1_R0	2	A multisubunit protein complex that plays a central role in chromosome condensation in meiosis and mitosis.	CC	condensin complex	0.117578
SAMC4339296	GO:0000796	4_rna-gnl|OEZ86|Sobl_g04417.t1_R0,4_rna-gnl|OEZ86|Sobl_g07447.t1_R0	2	A multisubunit protein complex that plays a central role in chromosome condensation in meiosis and mitosis.	CC	condensin complex	0.120265
SAMC4339297	GO:0000796	4_rna-gnl|OEZ86|Sobl_g07447.t1_R0,4_rna-gnl|OEZ86|Sobl_g04417.t1_R0	2	A multisubunit protein complex that plays a central role in chromosome condensation in meiosis and mitosis.	CC	condensin complex	0.104384
SAMC4339300	GO:0000796	4_rna-gnl|OEZ86|Sobl_g07447.t1_R0,4_rna-gnl|OEZ86|Sobl_g04417.t1_R0	2	A multisubunit protein complex that plays a central role in chromosome condensation in meiosis and mitosis.	CC	condensin complex	0.107181
SAMC4339298	GO:0000796	august_c_000000016387_split_00001-g5962.t1,4_rna-gnl|OEZ86|Sobl_g04417.t1_R0,4_rna-gnl|OEZ86|Sobl_g07447.t1_R0	3	A multisubunit protein complex that plays a central role in chromosome condensation in meiosis and mitosis.	CC	condensin complex	0.124844
SAMC4339299	GO:0000796	4_rna-gnl|OEZ86|Sobl_g04417.t1_R0,4_rna-gnl|OEZ86|Sobl_g07447.t1_R0	2	A multisubunit protein complex that plays a central role in chromosome condensation in meiosis and mitosis.	CC	condensin complex	0.103199
SAMC4339301	GO:0000796	4_rna-gnl|OEZ86|Sobl_g07447.t1_R0,4_rna-gnl|OEZ86|Sobl_g04417.t1_R0	2	A multisubunit protein complex that plays a central role in chromosome condensation in meiosis and mitosis.	CC	condensin complex	0.121507
GCA_000611645.1	GO:0000796	KIY94324.1_GCA_000611645	1	A multisubunit protein complex that plays a central role in chromosome condensation in meiosis and mitosis.	CC	condensin complex	0.109051
GCA_003203535.1	GO:0000796	GBF88554.1_GCA_003203535	1	A multisubunit protein complex that plays a central role in chromosome condensation in meiosis and mitosis.	CC	condensin complex	0.104167
GCA_014080715.1	GO:0000796	KAF6263853.1_GCA_014080715	1	A multisubunit protein complex that plays a central role in chromosome condensation in meiosis and mitosis.	CC	condensin complex	0.107759
GCA_014905635.1	GO:0000796	KAF8066223.1_GCA_014905635	1	A multisubunit protein complex that plays a central role in chromosome condensation in meiosis and mitosis.	CC	condensin complex	0.112108
GCA_025201885.1	GO:0000796	KAI8477446.1_GCA_025201885	1	A multisubunit protein complex that plays a central role in chromosome condensation in meiosis and mitosis.	CC	condensin complex	0.1002
GCA_030272055.1	GO:0000796	WIA14003.1_GCA_030272055	1	A multisubunit protein complex that plays a central role in chromosome condensation in meiosis and mitosis.	CC	condensin complex	0.0874126
GCA_030272155.1	GO:0000796	WIA34160.1_GCA_030272155	1	A multisubunit protein complex that plays a central role in chromosome condensation in meiosis and mitosis.	CC	condensin complex	0.0863558
SAMC4339295	GO:0042138	4_rna-gnl|OEZ86|Sobl_g02309.t1_R0	1	The cell cycle process in which double-strand breaks are generated at defined hotspots throughout the genome during meiosis I. This results in the initiation of meiotic recombination.	BP	meiotic DNA double-strand break formation	0.0198886
SAMC4339295	GO:0007131	august_c_000000105436_split_00002-g7886.t1,4_rna-gnl|OEZ86|Sobl_g22312.t1_R0,august_c_000000166033_split_00002-g6585.t1	3	The cell cycle process in which double strand breaks are formed and repaired through a single or double Holliday junction intermediate. This results in the equal exchange of genetic material between non-sister chromatids in a pair of homologous chromosomes. These reciprocal recombinant products ensure the proper segregation of homologous chromosomes during meiosis I and create genetic diversity.	BP	reciprocal meiotic recombination	0.0596659
SAMC4339296	GO:0007131	august_c_000000025656_split_00001-g164.t1,4_rna-gnl|OEZ86|Sobl_g22312.t1_R0,august_c_000000027479_split_00004-g601.t1	3	The cell cycle process in which double strand breaks are formed and repaired through a single or double Holliday junction intermediate. This results in the equal exchange of genetic material between non-sister chromatids in a pair of homologous chromosomes. These reciprocal recombinant products ensure the proper segregation of homologous chromosomes during meiosis I and create genetic diversity.	BP	reciprocal meiotic recombination	0.0625652
SAMC4339297	GO:0007131	4_rna-gnl|OEZ86|Sobl_g22312.t1_R0,4_rna-gnl|OEZ86|Sobl_g27491.t1_R0	2	The cell cycle process in which double strand breaks are formed and repaired through a single or double Holliday junction intermediate. This results in the equal exchange of genetic material between non-sister chromatids in a pair of homologous chromosomes. These reciprocal recombinant products ensure the proper segregation of homologous chromosomes during meiosis I and create genetic diversity.	BP	reciprocal meiotic recombination	0.0174095
SAMC4339300	GO:0007131	4_rna-gnl|OEZ86|Sobl_g22312.t1_R0,4_rna-gnl|OEZ86|Sobl_g27491.t1_R0	2	The cell cycle process in which double strand breaks are formed and repaired through a single or double Holliday junction intermediate. This results in the equal exchange of genetic material between non-sister chromatids in a pair of homologous chromosomes. These reciprocal recombinant products ensure the proper segregation of homologous chromosomes during meiosis I and create genetic diversity.	BP	reciprocal meiotic recombination	0.0337781
SAMC4339298	GO:0007131	4_rna-gnl|OEZ86|Sobl_g22312.t1_R0,4_rna-gnl|OEZ86|Sobl_g27491.t1_R0	2	The cell cycle process in which double strand breaks are formed and repaired through a single or double Holliday junction intermediate. This results in the equal exchange of genetic material between non-sister chromatids in a pair of homologous chromosomes. These reciprocal recombinant products ensure the proper segregation of homologous chromosomes during meiosis I and create genetic diversity.	BP	reciprocal meiotic recombination	0.0263852
SAMC4339299	GO:0007131	4_rna-gnl|OEZ86|Sobl_g22312.t1_R0,4_rna-gnl|OEZ86|Sobl_g27491.t1_R0	2	The cell cycle process in which double strand breaks are formed and repaired through a single or double Holliday junction intermediate. This results in the equal exchange of genetic material between non-sister chromatids in a pair of homologous chromosomes. These reciprocal recombinant products ensure the proper segregation of homologous chromosomes during meiosis I and create genetic diversity.	BP	reciprocal meiotic recombination	0.0348736
SAMC4339301	GO:0007131	4_rna-gnl|OEZ86|Sobl_g22312.t1_R0	1	The cell cycle process in which double strand breaks are formed and repaired through a single or double Holliday junction intermediate. This results in the equal exchange of genetic material between non-sister chromatids in a pair of homologous chromosomes. These reciprocal recombinant products ensure the proper segregation of homologous chromosomes during meiosis I and create genetic diversity.	BP	reciprocal meiotic recombination	0.0208507
SAMC4339295	GO:0005819	2_rna-gnl|WGS:LSYV|mrna.GPECTOR_42g844_R0	1	The array of microtubules and associated molecules that forms between opposite poles of a eukaryotic cell during mitosis or meiosis and serves to move the duplicated chromosomes apart.	CC	spindle	0.0587889
SAMC4339296	GO:0005819	4_rna-gnl|OEZ86|Sobl_g20738.t1_R0	1	The array of microtubules and associated molecules that forms between opposite poles of a eukaryotic cell during mitosis or meiosis and serves to move the duplicated chromosomes apart.	CC	spindle	0.0601323
SAMC4339297	GO:0005819	august_c_000000086356_split_00004-g11772.t1	1	The array of microtubules and associated molecules that forms between opposite poles of a eukaryotic cell during mitosis or meiosis and serves to move the duplicated chromosomes apart.	CC	spindle	0.0521921
SAMC4339300	GO:0005819	2_rna-gnl|WGS:LSYV|mrna.GPECTOR_42g844_R0	1	The array of microtubules and associated molecules that forms between opposite poles of a eukaryotic cell during mitosis or meiosis and serves to move the duplicated chromosomes apart.	CC	spindle	0.0535906
SAMC4339298	GO:0005819	august_c_000000022207_split_00013-g13679.t1	1	The array of microtubules and associated molecules that forms between opposite poles of a eukaryotic cell during mitosis or meiosis and serves to move the duplicated chromosomes apart.	CC	spindle	0.0416146
SAMC4339299	GO:0005819	4_rna-gnl|OEZ86|Sobl_g20738.t1_R0	1	The array of microtubules and associated molecules that forms between opposite poles of a eukaryotic cell during mitosis or meiosis and serves to move the duplicated chromosomes apart.	CC	spindle	0.0515996
SAMC4339301	GO:0005819	august_c_000000003805_split_00002-g4068.t1,2_rna-gnl|WGS:LSYV|mrna.GPECTOR_42g844_R0	2	The array of microtubules and associated molecules that forms between opposite poles of a eukaryotic cell during mitosis or meiosis and serves to move the duplicated chromosomes apart.	CC	spindle	0.121507

## Sheet:  Table S7
ID	Lnl1	Lnl2	LRT	P_value	P_adjust
OG0003039	-10757.9	-12004.8	2493.81	0	0
OG0000178	-9212.92	-10013.6	1601.33	0	0
OG0005654	-9163.88	-10187.1	2046.47	0	0
OG0005543	-8773.87	-9714.99	1882.23	0	0
OG0006079	-8615	-9700.49	2170.98	0	0
OG0003011	-7771.27	-8749.74	1956.96	0	0
OG0000762	-7454.77	-8123.31	1337.09	0	0
OG0006223	-7282.76	-7900.64	1235.76	0	0
OG0004720	-7159.84	-7896.15	1472.63	0	0
OG0006387	-7035.69	-7842.96	1614.54	0	0
OG0006387	-7035.69	-7842.96	1614.54	0	0
OG0005232	-7007.48	-7756.32	1497.67	0	0
OG0000506	-6776.76	-7423.36	1293.2	0	0
OG0005599	-6763.99	-7548.52	1569.06	0	0
OG0006222	-6733.84	-7452.94	1438.19	0	0
OG0000454	-6565.51	-7023.41	915.805	0	0
OG0005621	-6505.2	-7243.06	1475.72	0	0
OG0001841	-6433.58	-7104.21	1341.27	0	0
OG0004560	-6390.61	-7111.59	1441.96	0	0
OG0004076	-6209.5	-6912.09	1405.18	0	0
OG0002077	-6112.78	-6857.75	1489.93	0	0
OG0005033	-6101.75	-6820.94	1438.4	0	0
OG0004509	-6093.14	-6844.07	1501.85	0	0
OG0004783	-6035.15	-6689.04	1307.78	0	0
OG0000774	-5802.53	-6380.13	1155.21	0	0
OG0003779	-5711.64	-6339.82	1256.36	0	0
OG0002205	-5696.26	-6080.17	767.82	0	0
OG0000911	-5670.62	-6296.76	1252.27	0	0
OG0006267	-5656.07	-6318.38	1324.62	0	0
OG0000009	-5637.9	-6161.37	1046.96	0	0
OG0000080	-5614.54	-6011.64	794.2	0	0
OG0004409	-5592.62	-6098.92	1012.59	0	0
OG0005426	-5568.12	-6078.3	1020.35	0	0
OG0000573	-5551.41	-6214.66	1326.5	0	0
OG0004812	-5544.44	-6200.16	1311.44	0	0
OG0003491	-5526.21	-6096.15	1139.88	0	0
OG0005780	-5522.98	-6058.55	1071.14	0	0
OG0004821	-5517.18	-6010.88	987.399	0	0
OG0003260	-5479.65	-6016.49	1073.67	0	0
OG0003623	-5339.93	-5934.25	1188.65	0	0
OG0000876	-5338.3	-5796.27	915.95	0	0
OG0004212	-5330.87	-5936.77	1211.81	0	0
OG0003730	-5324.97	-5922.49	1195.04	0	0
OG0005713	-5324.32	-5845.4	1042.16	0	0
OG0005699	-5316.06	-5871.01	1109.9	0	0
OG0000305	-5293.31	-5849.98	1113.33	0	0
OG0005071	-5279.46	-5752.04	945.146	0	0
OG0003848	-5277.2	-5812.52	1070.63	0	0
OG0003551	-5268.29	-5808.38	1080.17	0	0
OG0000605	-5257.01	-5683.43	852.837	0	0
OG0003896	-5208.6	-5863.32	1309.44	0	0
OG0001468	-5187.95	-5745.04	1114.2	0	0
OG0003626	-5152.75	-5601.32	897.144	0	0
OG0004343	-5117.34	-5612.09	989.498	0	0
OG0002396	-5081.88	-5659.86	1155.96	0	0
OG0004788	-5048.74	-5464.2	830.918	0	0
OG0004393	-5047.47	-5575.9	1056.87	0	0
OG0005149	-5031.41	-5682.35	1301.87	0	0
OG0004441	-5016.69	-5460.39	887.401	0	0
OG0005619	-4968	-5591.23	1246.45	0	0
OG0005836	-4887.94	-5404.69	1033.51	0	0
OG0002491	-4858.8	-5387.99	1058.38	0	0
OG0003628	-4830.06	-5289.06	918.002	0	0
OG0005739	-4811.46	-5312.07	1001.22	0	0
OG0005169	-4767.66	-5272.68	1010.04	0	0
OG0005054	-4762.24	-5213.56	902.63	0	0
OG0004495	-4730.64	-5188.91	916.538	0	0
OG0005108	-4723.78	-5153.62	859.683	0	0
OG0000501	-4721.67	-5268.87	1094.4	0	0
OG0005693	-4707.42	-5190.79	966.743	0	0
OG0000469	-4698.29	-5226.15	1055.71	0	0
OG0003696	-4689.3	-5093.81	809.031	0	0
OG0004150	-4683.75	-5128.08	888.649	0	0
OG0003388	-4671.1	-5097.06	851.917	0	0
OG0006117	-4643.01	-5013.03	740.044	0	0
OG0006109	-4617.68	-5074.02	912.684	0	0
OG0005264	-4617.17	-5091.02	947.704	0	0
OG0006076	-4588.71	-5138.28	1099.13	0	0
OG0002217	-4531.08	-4979.15	896.136	0	0
OG0005639	-4530.31	-5032.62	1004.61	0	0
OG0000097	-4518.15	-5031.25	1026.2	0	0
OG0002937	-4517.33	-4990.91	947.159	0	0
OG0006273	-4515.42	-5061.16	1091.48	0	0
OG0000881	-4513.05	-4860.21	694.325	0	0
OG0002377	-4509.97	-4898.56	777.189	0	0
OG0004248	-4470.76	-4920.82	900.131	0	0
OG0005123	-4462.09	-4831.58	738.983	0	0
OG0000241	-4448.92	-4795.7	693.55	0	0
OG0005714	-4407.67	-4864.2	913.05	0	0
OG0006244	-4398.14	-4889.03	981.785	0	0
OG0006107	-4365.23	-4905.63	1080.8	0	0
OG0001259	-4361.11	-4880.92	1039.63	0	0
OG0000560	-4359.74	-4745.14	770.802	0	0
OG0005068	-4318.29	-4746.69	856.804	0	0
OG0002803	-4317.6	-4886.9	1138.6	0	0
OG0005051	-4298.31	-4786.76	976.913	0	0
OG0005385	-4296.33	-4692.87	793.098	0	0
OG0000242	-4292.5	-4771.96	958.925	0	0
OG0002017	-4288.88	-4693.23	808.695	0	0
OG0003864	-4287.36	-4730.21	885.715	0	0
OG0005922	-4282.83	-4781.99	998.323	0	0
OG0003128	-4282.31	-4661.14	757.668	0	0
OG0005200	-4271.14	-4627.97	713.675	0	0
OG0001191	-4270.22	-4719.83	899.229	0	0
OG0005576	-4252.97	-4724.17	942.395	0	0
OG0001859	-4232.92	-4703.94	942.034	0	0
OG0005523	-4230.65	-4708.13	954.965	0	0
OG0003467	-4224.51	-4701.24	953.454	0	0
OG0002830	-4219.34	-4713.72	988.762	0	0
OG0004226	-4205.25	-4606.54	802.579	0	0
OG0005700	-4203.88	-4654.62	901.474	0	0
OG0005392	-4184.82	-4653.55	937.462	0	0
OG0005204	-4153.89	-4589.62	871.449	0	0
OG0005486	-4129.18	-4632.76	1007.16	0	0
OG0004350	-4128.83	-4465.28	672.905	0	0
OG0000424	-4109.6	-4439.18	659.166	0	0
OG0004329	-4107.52	-4541.95	868.862	0	0
OG0004828	-4070.35	-4465.15	789.593	0	0
OG0001784	-4038.19	-4361.84	647.297	0	0
OG0000699	-4037.3	-4423.09	771.577	0	0
OG0005701	-4034.82	-4490.1	910.55	0	0
OG0002762	-4026.43	-4507.85	962.842	0	0
OG0004557	-4012.91	-4367.13	708.431	0	0
OG0002515	-4005.95	-4418.84	825.773	0	0
OG0003524	-4002.68	-4425.31	845.268	0	0
OG0005452	-3995.28	-4467.51	944.459	0	0
OG0002971	-3995.27	-4265.99	541.447	0	0
OG0004443	-3981.75	-4363.53	763.548	0	0
OG0002144	-3971.14	-4385.62	828.967	0	0
OG0006298	-3965.65	-4386.62	841.937	0	0
OG0005144	-3947.61	-4329.09	762.941	0	0
OG0000789	-3920.18	-4391.54	942.713	0	0
OG0000814	-3907.64	-4297.6	779.915	0	0
OG0004772	-3902.15	-4150.21	496.133	0	0
OG0006013	-3900.29	-4398.7	996.826	0	0
OG0000230	-3880.07	-4218.28	676.405	0	0
OG0004878	-3861.61	-4294.78	866.34	0	0
OG0001985	-3855.94	-4457.33	1202.78	0	0
OG0002787	-3854.43	-4226.33	743.804	0	0
OG0003366	-3846.97	-4219.73	745.517	0	0
OG0003422	-3832.04	-4164.11	664.133	0	0
OG0006043	-3830.24	-4331.02	1001.56	0	0
OG0002942	-3824.9	-4297.92	946.048	0	0
OG0006072	-3813.1	-4113.26	600.318	0	0
OG0006219	-3811.66	-4165.76	708.207	0	0
OG0006213	-3807.59	-4224.02	832.85	0	0
OG0000823	-3805.08	-4131.2	652.232	0	0
OG0000841	-3803.52	-4116.38	625.712	0	0
OG0006239	-3802.18	-4223.64	842.91	0	0
OG0003122	-3798.96	-4171.97	746.022	0	0
OG0001053	-3798.38	-4220.29	843.809	0	0
OG0004193	-3798.31	-4165.57	734.529	0	0
OG0005698	-3791.23	-4234.91	887.365	0	0
OG0006216	-3789.63	-4149.92	720.585	0	0
OG0004408	-3783.72	-4190.22	813.017	0	0
OG0000898	-3780.03	-4227.98	895.902	0	0
OG0005168	-3779.04	-4167.03	775.993	0	0
OG0002057	-3772.8	-4128.48	711.371	0	0
OG0001991	-3754.54	-4076.64	644.191	0	0
OG0001997	-3747.5	-4038.93	582.851	0	0
OG0003642	-3738.06	-4176.05	875.98	0	0
OG0001071	-3736.54	-3981.28	489.49	0	0
OG0005740	-3735.96	-4182.59	893.271	0	0
OG0003490	-3735.23	-4119.33	768.194	0	0
OG0004640	-3733.08	-4184.05	901.941	0	0
OG0000398	-3714.62	-4133.2	837.154	0	0
OG0005977	-3713.95	-4136.85	845.8	0	0
OG0000919	-3697.8	-4067.48	739.356	0	0
OG0005121	-3697.66	-4012.26	629.191	0	0
OG0006191	-3696.72	-4167.78	942.127	0	0
OG0000523	-3696.51	-4080.13	767.236	0	0
OG0003783	-3693.29	-4050.67	714.756	0	0
OG0003394	-3693.17	-4033.74	681.131	0	0
OG0001227	-3689.65	-4098.13	816.965	0	0
OG0006321	-3687.37	-3967.58	560.419	0	0
OG0006321	-3687.37	-3967.58	560.419	0	0
OG0000905	-3679.69	-4084.85	810.332	0	0
OG0000692	-3678.92	-3973.27	588.711	0	0
OG0005615	-3655.4	-3931.79	552.776	0	0
OG0003057	-3652.7	-3968.44	631.474	0	0
OG0006280	-3650.26	-4094.81	889.098	0	0
OG0000483	-3641.51	-4011.48	739.948	0	0
OG0000808	-3640.35	-3975.09	669.493	0	0
OG0003541	-3638.86	-3976.27	674.835	0	0
OG0000180	-3626.55	-3979.78	706.46	0	0
OG0004779	-3616.42	-3914.64	596.44	0	0
OG0004534	-3611.54	-4016.74	810.397	0	0
OG0000803	-3605.51	-3892.76	574.507	0	0
OG0006073	-3603.24	-3997.83	789.169	0	0
OG0006009	-3596.16	-3978.64	764.97	0	0
OG0003162	-3584.61	-3934.48	699.752	0	0
OG0001352	-3583.42	-3941.21	715.575	0	0
OG0005356	-3566.35	-3960.3	787.906	0	0
OG0000134	-3561.27	-3892.58	662.61	0	0
OG0005521	-3560.89	-3915.8	709.833	0	0
OG0003561	-3551.66	-3873.82	644.327	0	0
OG0002601	-3547.38	-3928.62	762.493	0	0
OG0005263	-3541.18	-3822.74	563.126	0	0
OG0005756	-3541.04	-3979.9	877.721	0	0
OG0004700	-3514.85	-3902.3	774.887	0	0
OG0006016	-3512.9	-3898.54	771.289	0	0
OG0005648	-3506.1	-3899.19	786.184	0	0
OG0002066	-3496.19	-3873.88	755.38	0	0
OG0004820	-3490.76	-3811.39	641.252	0	0
OG0006033	-3482.06	-3836.79	709.459	0	0
OG0001388	-3480.38	-3815.2	669.645	0	0
OG0005998	-3468.39	-3920.37	903.949	0	0
OG0006147	-3453.46	-3783.92	660.913	0	0
OG0005453	-3452.92	-3771.87	637.884	0	0
OG0000205	-3451.48	-3788.56	674.146	0	0
OG0003648	-3450.52	-3742.09	583.151	0	0
OG0000286	-3442.8	-3709.12	532.626	0	0
OG0004337	-3439.98	-3823.3	766.65	0	0
OG0002622	-3424.94	-3864.19	878.494	0	0
OG0004269	-3424.43	-3805.7	762.534	0	0
OG0005844	-3422.05	-3743.85	643.598	0	0
OG0005513	-3419.91	-3719.81	599.791	0	0
OG0002833	-3409.47	-3739.85	660.766	0	0
OG0003483	-3399.86	-3723.97	648.231	0	0
OG0003935	-3398.57	-3773.03	748.925	0	0
OG0004374	-3392.56	-3771.22	757.334	0	0
OG0001866	-3388.3	-3751.39	726.181	0	0
OG0002423	-3387.83	-3727.86	680.056	0	0
OG0000225	-3380.75	-3654.96	548.437	0	0
OG0000677	-3375.64	-3755.07	758.87	0	0
OG0006271	-3374.73	-3782.09	814.714	0	0
OG0006040	-3374.09	-3785.97	823.763	0	0
OG0006017	-3368.29	-3694.07	651.552	0	0
OG0005297	-3363.46	-3756.97	787.027	0	0
OG0005828	-3359.15	-3670.59	622.882	0	0
OG0006152	-3355.95	-3668.58	625.265	0	0
OG0005862	-3355.35	-3704.1	697.494	0	0
OG0005932	-3338.36	-3674.34	671.964	0	0
OG0004147	-3337.26	-3629.36	584.201	0	0
OG0004687	-3332.07	-3683	701.855	0	0
OG0004639	-3331.23	-3707.41	752.352	0	0
OG0006036	-3330.07	-3650.43	640.729	0	0
OG0005271	-3326.6	-3736.3	819.409	0	0
OG0002322	-3323.97	-3553.46	458.967	0	0
OG0004062	-3322.18	-3674.16	703.964	0	0
OG0004745	-3321.62	-3560.95	478.665	0	0
OG0003930	-3318.84	-3684.69	731.696	0	0
OG0002517	-3318.78	-3648.89	660.233	0	0
OG0005613	-3313.95	-3666.95	705.991	0	0
OG0002291	-3313.22	-3606.07	585.694	0	0
OG0004341	-3312.04	-3564.21	504.343	0	0
OG0005418	-3311.93	-3687.04	750.228	0	0
OG0001373	-3307.96	-3635.86	655.799	0	0
OG0005047	-3307.2	-3678.07	741.745	0	0
OG0002212	-3303.29	-3583.21	559.852	0	0
OG0004564	-3291.82	-3610.28	636.926	0	0
OG0002456	-3291.54	-3541.66	500.23	0	0
OG0004138	-3290.54	-3601.16	621.242	0	0
OG0006184	-3280.27	-3626.85	693.168	0	0
OG0006045	-3277.44	-3582.58	610.28	0	0
OG0002984	-3276.89	-3625.03	696.284	0	0
OG0000179	-3276.88	-3647.33	740.896	0	0
OG0003793	-3271.37	-3621.72	700.696	0	0
OG0005293	-3266.08	-3622.02	711.887	0	0
OG0006028	-3263.72	-3523.68	519.93	0	0
OG0000704	-3256.17	-3604.69	697.032	0	0
OG0004294	-3256.12	-3582.81	653.385	0	0
OG0000732	-3254.55	-3524.09	539.086	0	0
OG0006312	-3251.87	-3610.84	717.95	0	0
OG0006312	-3251.87	-3610.84	717.95	0	0
OG0006342	-3251.27	-3572.53	642.522	0	0
OG0006342	-3251.27	-3572.53	642.522	0	0
OG0005215	-3250.24	-3601.87	703.253	0	0
OG0004247	-3249.2	-3539.98	581.559	0	0
OG0004131	-3245.67	-3563.31	635.285	0	0
OG0002089	-3243.73	-3675.27	863.08	0	0
OG0002461	-3241.36	-3562.65	642.566	0	0
OG0005766	-3236.59	-3628.26	783.338	0	0
OG0000728	-3234.9	-3463.62	457.434	0	0
OG0002753	-3224.59	-3558.54	667.895	0	0
OG0004483	-3211.23	-3450.09	477.723	0	0
OG0005155	-3209.63	-3544.15	669.047	0	0
OG0000511	-3201.45	-3589.42	775.939	0	0
OG0005669	-3190.87	-3561.23	740.728	0	0
OG0003912	-3189.62	-3509.88	640.522	0	0
OG0000771	-3186.54	-3526.48	679.883	0	0
OG0000697	-3185.56	-3488.16	605.19	0	0
OG0001296	-3182.88	-3476.97	588.18	0	0
OG0006005	-3177.15	-3482.83	611.356	0	0
OG0000640	-3174.94	-3514.31	678.753	0	0
OG0004047	-3168.41	-3517.78	698.737	0	0
OG0006115	-3167.86	-3524.35	712.971	0	0
OG0003593	-3165.4	-3532.63	734.46	0	0
OG0000738	-3165.31	-3378.71	426.811	0	0
OG0005097	-3164.46	-3503.93	678.938	0	0
OG0002078	-3157.01	-3453.5	592.982	0	0
OG0004220	-3143.91	-3443.36	598.909	0	0
OG0003895	-3142.82	-3508.47	731.301	0	0
OG0005311	-3135.46	-3403.63	536.342	0	0
OG0005575	-3132.55	-3363.85	462.595	0	0
OG0005484	-3129.87	-3385.67	511.597	0	0
OG0005529	-3127.53	-3438.47	621.888	0	0
OG0001829	-3123.12	-3437.86	629.488	0	0
OG0001718	-3120.3	-3397.31	554.024	0	0
OG0005113	-3115.76	-3428.26	624.996	0	0
OG0000233	-3112.26	-3462.76	700.995	0	0
OG0004754	-3107.18	-3378.08	541.8	0	0
OG0006124	-3106.66	-3376.58	539.858	0	0
OG0004803	-3103.95	-3432.08	656.264	0	0
OG0006269	-3102.18	-3369.13	533.894	0	0
OG0006136	-3100.56	-3486.96	772.81	0	0
OG0002826	-3095.97	-3448.66	705.376	0	0
OG0006397	-3094.9	-3367.14	544.486	0	0
OG0006397	-3094.9	-3367.14	544.486	0	0
OG0000255	-3093.69	-3411.67	635.964	0	0
OG0005969	-3093.3	-3427.9	669.199	0	0
OG0003509	-3090.83	-3497.82	813.968	0	0
OG0002283	-3090.09	-3432.63	685.087	0	0
OG0004403	-3089.98	-3440.3	700.636	0	0
OG0005515	-3089.05	-3416.57	655.036	0	0
OG0005126	-3087.28	-3371.01	567.466	0	0
OG0000002	-3080.6	-3355	548.804	0	0
OG0005694	-3075.41	-3468.34	785.857	0	0
OG0004440	-3072.74	-3416.25	687.018	0	0
OG0003053	-3069.24	-3411.24	683.994	0	0
OG0004581	-3069.13	-3320.12	501.992	0	0
OG0005058	-3068.49	-3365.11	593.228	0	0
OG0006176	-3066.5	-3357.21	581.415	0	0
OG0003574	-3065.57	-3415.46	699.779	0	0
OG0003683	-3059.76	-3466.87	814.232	0	0
OG0003218	-3059.37	-3338.04	557.34	0	0
OG0003790	-3058.11	-3362.25	608.273	0	0
OG0004931	-3052.97	-3351.22	596.505	0	0
OG0000146	-3051.61	-3340.2	577.186	0	0
OG0005572	-3050.94	-3349.93	597.99	0	0
OG0004524	-3042.75	-3329.55	573.6	0	0
OG0003704	-3042.55	-3301.63	518.16	0	0
OG0002236	-3042	-3305.75	527.494	0	0
OG0006232	-3039.09	-3323.78	569.379	0	0
OG0002012	-3038.69	-3409.34	741.314	0	0
OG0002319	-3037.83	-3304.89	534.122	0	0
OG0006402	-3035.09	-3323.92	577.659	0	0
OG0006402	-3035.09	-3323.92	577.659	0	0
OG0005231	-3025.5	-3327.35	603.696	0	0
OG0002058	-3024.55	-3269.94	490.773	0	0
OG0005349	-3017.72	-3286.14	536.844	0	0
OG0006003	-3016.91	-3287.21	540.61	0	0
OG0004342	-3015.48	-3370.98	710.99	0	0
OG0004815	-3014.33	-3248.66	468.651	0	0
OG0000529	-3014.19	-3367.74	707.107	0	0
OG0002807	-3011.97	-3283.31	542.68	0	0
OG0006179	-3011.09	-3370.49	718.799	0	0
OG0000562	-2980.31	-3279.74	598.865	0	0
OG0000844	-2977.91	-3255.72	555.616	0	0
OG0001105	-2977.77	-3353.57	751.608	0	0
OG0003441	-2975.96	-3205.92	459.919	0	0
OG0003867	-2971.07	-3243.3	544.452	0	0
OG0004746	-2968.63	-3235.16	533.06	0	0
OG0006106	-2962.39	-3230.75	536.72	0	0
OG0000765	-2961.84	-3260.82	597.96	0	0
OG0005130	-2959.01	-3274.24	630.471	0	0
OG0005296	-2953.83	-3359.33	810.99	0	0
OG0002172	-2952.94	-3281.35	656.822	0	0
OG0002605	-2950.67	-3191.64	481.93	0	0
OG0005824	-2946.41	-3144.73	396.627	0	0
OG0004267	-2945.98	-3296.52	701.077	0	0
OG0004379	-2944.78	-3148.69	407.828	0	0
OG0005747	-2943.39	-3231.74	576.693	0	0
OG0000474	-2943.34	-3222.14	557.596	0	0
OG0001207	-2940.13	-3212.05	543.852	0	0
OG0004916	-2935.31	-3230.6	590.565	0	0
OG0002871	-2930.44	-3312.02	763.162	0	0
OG0006051	-2929.95	-3213.52	567.133	0	0
OG0006226	-2929.26	-3250.75	642.994	0	0
OG0005954	-2925.66	-3227.74	604.152	0	0
OG0005636	-2924.12	-3261.45	674.673	0	0
OG0003148	-2923.62	-3287.79	728.342	0	0
OG0002332	-2919.27	-3173.05	507.553	0	0
OG0004717	-2910.43	-3182.9	544.94	0	0
OG0003812	-2904.41	-3301.66	794.489	0	0
OG0005720	-2903.29	-3181.17	555.765	0	0
OG0005601	-2890.9	-3134.37	486.926	0	0
OG0005785	-2889.97	-3238.4	696.855	0	0
OG0006250	-2887.24	-3254.72	734.955	0	0
OG0005846	-2887.15	-3132.9	491.511	0	0
OG0000280	-2881.95	-3033.39	302.877	0	0
OG0000099	-2875.98	-3205.39	658.834	0	0
OG0002635	-2872.44	-3125.14	505.393	0	0
OG0001197	-2870.07	-3257.46	774.782	0	0
OG0002927	-2865.36	-3170.08	609.44	0	0
OG0005355	-2862	-3166.61	609.236	0	0
OG0001144	-2861.61	-3164.31	605.387	0	0
OG0002910	-2861.58	-3056.29	389.427	0	0
OG0006034	-2856.16	-3136.09	559.872	0	0
OG0005308	-2851.13	-3108.53	514.805	0	0
OG0003872	-2848.46	-3107.88	518.849	0	0
OG0005664	-2845.72	-3088.7	485.943	0	0
OG0005141	-2845.02	-3145.74	601.437	0	0
OG0004357	-2842.95	-3090.64	495.373	0	0
OG0000059	-2835.9	-3155.13	638.443	0	0
OG0003519	-2832.37	-3145.95	627.143	0	0
OG0006291	-2832.21	-3167.67	670.934	0	0
OG0005072	-2827.5	-3138.18	621.357	0	0
OG0000216	-2825.88	-3021.34	390.926	0	0
OG0004297	-2825.36	-3057.34	463.96	0	0
OG0006182	-2822.87	-3139.9	634.066	0	0
OG0005665	-2822.5	-3196.62	748.25	0	0
OG0003857	-2815.5	-3103.41	575.816	0	0
OG0006390	-2814.92	-3040.71	451.581	0	0
OG0006390	-2814.92	-3040.71	451.581	0	0
OG0000600	-2813.68	-3134.37	641.378	0	0
OG0006309	-2812.58	-3086.21	547.268	0	0
OG0005095	-2808.61	-3151.36	685.503	0	0
OG0002856	-2804.98	-3045.24	480.531	0	0
OG0006324	-2804.16	-3037.69	467.065	0	0
OG0006324	-2804.16	-3037.69	467.065	0	0
OG0004626	-2802.92	-3045.48	485.135	0	0
OG0002812	-2794.93	-3070.07	550.269	0	0
OG0004239	-2794.06	-3095	601.876	0	0
OG0005590	-2791.33	-3071.86	561.057	0	0
OG0004402	-2783.54	-3057.58	548.09	0	0
OG0003213	-2783.5	-3129.4	691.795	0	0
OG0001602	-2783.41	-3088.91	611	0	0
OG0005722	-2778.12	-3106.29	656.358	0	0
OG0005282	-2777.82	-3073.83	592.024	0	0
OG0004399	-2776.03	-3106.38	660.696	0	0
OG0002963	-2773.12	-3035.92	525.598	0	0
OG0003176	-2769.84	-3017.73	495.796	0	0
OG0000793	-2767.72	-3069.99	604.533	0	0
OG0000518	-2766.19	-3064.18	595.973	0	0
OG0000595	-2765.2	-3053.25	576.117	0	0
OG0005206	-2761.65	-3038.7	554.107	0	0
OG0001251	-2759.06	-3114.13	710.14	0	0
OG0003629	-2758.67	-3021.95	526.554	0	0
OG0005549	-2758.47	-3009.33	501.713	0	0
OG0001596	-2754.31	-2921.75	334.896	0	0
OG0000599	-2753.91	-2925.8	343.777	0	0
OG0005187	-2750.27	-3054.76	608.969	0	0
OG0000607	-2746.2	-3058.89	625.397	0	0
OG0004286	-2745.14	-3017.33	544.379	0	0
OG0004522	-2738.64	-3060.44	643.608	0	0
OG0001660	-2736.47	-3013.43	553.923	0	0
OG0003221	-2734.86	-2964.75	459.785	0	0
OG0005348	-2733.49	-3001.83	536.692	0	0
OG0000929	-2731.93	-2973.81	483.755	0	0
OG0003070	-2731.13	-3057.31	652.372	0	0
OG0004567	-2729.67	-2985.34	511.342	0	0
OG0005625	-2728.32	-3011.38	566.129	0	0
OG0000834	-2727.95	-3029.31	602.726	0	0
OG0005919	-2723.43	-2987.04	527.227	0	0
OG0000591	-2705.26	-2957.91	505.292	0	0
OG0003581	-2703.95	-3020.75	633.616	0	0
OG0002154	-2695.93	-2999.62	607.375	0	0
OG0006201	-2695.33	-2957.1	523.556	0	0
OG0001769	-2694.86	-2959.52	529.306	0	0
OG0006209	-2694.43	-2850.78	312.698	0	0
OG0004468	-2693.27	-2969.26	551.978	0	0
OG0004510	-2693.06	-2946.22	506.322	0	0
OG0005875	-2692.31	-3018.13	651.631	0	0
OG0001491	-2687.41	-2987.14	599.47	0	0
OG0002048	-2682.7	-3031.41	697.427	0	0
OG0003084	-2682.6	-2964.25	563.308	0	0
OG0003552	-2680.44	-2937.98	515.067	0	0
OG0003586	-2679.09	-3006.95	655.719	0	0
OG0002553	-2678.01	-3008.91	661.8	0	0
OG0006193	-2676.49	-2905.9	458.834	0	0
OG0006340	-2675.85	-2951.59	551.48	0	0
OG0006340	-2675.85	-2951.59	551.48	0	0
OG0001558	-2673.66	-2970.9	594.498	0	0
OG0001786	-2672.18	-2964.38	584.4	0	0
OG0000830	-2671.21	-3122.64	902.861	0	0
OG0003378	-2667.62	-2905.88	476.513	0	0
OG0000879	-2664.98	-2871.6	413.231	0	0
OG0002315	-2663.36	-2968.63	610.521	0	0
OG0005393	-2659.76	-2932.67	545.817	0	0
OG0004747	-2658.87	-2974.18	630.624	0	0
OG0002930	-2656.27	-2971.65	630.761	0	0
OG0004201	-2655.32	-2921.71	532.786	0	0
OG0005119	-2655.09	-2972.97	635.753	0	0
OG0005158	-2653.78	-2987.93	668.302	0	0
OG0005789	-2650.36	-2942.8	584.883	0	0
OG0000353	-2648.33	-2901.67	506.672	0	0
OG0005536	-2647.85	-2955.49	615.279	0	0
OG0004401	-2647.61	-2890.37	485.532	0	0
OG0004414	-2647.42	-2954.27	613.707	0	0
OG0003654	-2646.63	-2868.94	444.623	0	0
OG0002911	-2644.81	-2859.03	428.437	0	0
OG0002944	-2643.01	-2881.34	476.653	0	0
OG0000094	-2640.16	-2912.66	544.986	0	0
OG0005968	-2640.06	-2905.23	530.338	0	0
OG0005818	-2638.79	-2924.02	570.47	0	0
OG0005851	-2637.78	-2899.66	523.768	0	0
OG0005535	-2637.68	-2897.33	519.294	0	0
OG0005257	-2635.81	-2953.03	634.442	0	0
OG0005946	-2633.59	-2931.37	595.563	0	0
OG0004831	-2632.92	-2893.62	521.4	0	0
OG0004323	-2621.71	-2881.51	519.595	0	0
OG0006285	-2620.94	-2902.2	562.524	0	0
OG0002042	-2620.55	-2909.27	577.45	0	0
OG0003679	-2620.49	-2885.85	530.703	0	0
OG0005683	-2620.16	-2846.99	453.658	0	0
OG0001617	-2619.11	-2889.43	540.648	0	0
OG0003530	-2618.14	-2879.59	522.901	0	0
OG0006037	-2616.48	-2911.58	590.207	0	0
OG0004142	-2615.14	-2834.47	438.654	0	0
OG0004549	-2614.96	-2856.78	483.632	0	0
OG0003063	-2608.38	-2851.03	485.297	0	0
OG0004603	-2607.85	-2899.64	583.583	0	0
OG0005837	-2605.56	-2756.59	302.06	0	0
OG0001242	-2599.12	-2788.88	379.501	0	0
OG0005796	-2598.67	-2883.73	570.115	0	0
OG0006283	-2595.1	-2814.49	438.773	0	0
OG0000217	-2588.9	-2760.23	342.669	0	0
OG0005784	-2583.88	-2817.4	467.035	0	0
OG0004237	-2582.17	-2826.18	488.011	0	0
OG0003398	-2581.32	-2845.2	527.745	0	0
OG0005890	-2578.75	-2872.11	586.716	0	0
OG0005927	-2576.43	-2879.95	607.036	0	0
OG0000746	-2574.89	-2856.71	563.64	0	0
OG0006401	-2574.19	-2819.42	490.464	0	0
OG0006401	-2574.19	-2819.42	490.464	0	0
OG0006027	-2573.55	-2802.23	457.355	0	0
OG0003891	-2566.9	-2860.7	587.599	0	0
OG0004363	-2565.76	-2827.88	524.224	0	0
OG0000384	-2561.67	-2780.16	436.981	0	0
OG0005310	-2557.9	-2799.53	483.255	0	0
OG0005370	-2557.89	-2815.23	514.678	0	0
OG0005595	-2557.19	-2847.45	580.505	0	0
OG0006393	-2551.21	-2811.29	520.151	0	0
OG0006393	-2551.21	-2811.29	520.151	0	0
OG0006376	-2548.53	-2800.3	503.539	0	0
OG0006376	-2548.53	-2800.3	503.539	0	0
OG0004370	-2548.15	-2758.01	419.716	0	0
OG0003032	-2547.42	-2817.63	540.41	0	0
OG0001106	-2545.67	-2750.15	408.949	0	0
OG0005414	-2545.45	-2819.58	548.253	0	0
OG0003620	-2542.07	-2744.19	404.243	0	0
OG0001164	-2541.57	-2793.95	504.76	0	0
OG0006233	-2541.41	-2806.27	529.728	0	0
OG0005207	-2541.24	-2800.22	517.971	0	0
OG0004787	-2541.22	-2755.75	429.066	0	0
OG0002399	-2540.57	-2733.99	386.838	0	0
OG0005685	-2537.74	-2806.55	537.619	0	0
OG0003981	-2529.19	-2760.54	462.716	0	0
OG0003826	-2525.86	-2771.64	491.547	0	0
OG0005866	-2524.82	-2771.48	493.312	0	0
OG0004686	-2512.8	-2770.33	515.053	0	0
OG0001084	-2509.89	-2751.68	483.576	0	0
OG0005170	-2508.11	-2762.49	508.774	0	0
OG0005901	-2504.36	-2708.87	409.028	0	0
OG0003026	-2502.68	-2758.35	511.348	0	0
OG0006021	-2502.21	-2692.28	380.148	0	0
OG0005489	-2500.74	-2750.18	498.889	0	0
OG0000628	-2497.94	-2785.84	575.802	0	0
OG0006089	-2494.57	-2697.29	405.451	0	0
OG0005057	-2493.83	-2829.36	671.065	0	0
OG0004224	-2493.73	-2699.49	411.528	0	0
OG0000817	-2491.82	-2689.12	394.599	0	0
OG0005609	-2488.76	-2752.46	527.395	0	0
OG0002885	-2488.47	-2786.97	596.991	0	0
OG0005444	-2486.63	-2724.85	476.444	0	0
OG0005791	-2484.42	-2697.44	426.035	0	0
OG0006364	-2483.18	-2685.45	404.539	0	0
OG0006364	-2483.18	-2685.45	404.539	0	0
OG0005190	-2482.54	-2712.89	460.705	0	0
OG0004697	-2478.86	-2667.94	378.152	0	0
OG0002668	-2477.42	-2695.91	436.994	0	0
OG0005900	-2473.64	-2769.32	591.356	0	0
OG0004684	-2467.65	-2689.19	443.091	0	0
OG0002556	-2467.58	-2736.43	537.692	0	0
OG0004369	-2464.69	-2637.53	345.69	0	0
OG0005163	-2462.7	-2738.3	551.185	0	0
OG0004167	-2455.39	-2749.16	587.535	0	0
OG0005936	-2454.98	-2722.46	534.952	0	0
OG0005485	-2454.94	-2677.73	445.581	0	0
OG0002074	-2453.59	-2625.78	344.376	0	0
OG0006218	-2446.94	-2698.42	502.964	0	0
OG0004809	-2441.22	-2718.16	553.883	0	0
OG0005343	-2440.52	-2700.45	519.862	0	0
OG0005978	-2440.34	-2656.89	433.108	0	0
OG0005574	-2438.53	-2671.11	465.167	0	0
OG0000576	-2438.26	-2697.51	518.507	0	0
OG0000665	-2435.91	-2679.86	487.881	0	0
OG0005362	-2433.92	-2665.49	463.142	0	0
OG0005794	-2433.29	-2694.05	521.53	0	0
OG0005431	-2433.28	-2647.16	427.753	0	0
OG0003450	-2432.31	-2626.91	389.207	0	0
OG0005591	-2431.73	-2743.36	623.268	0	0
OG0002045	-2428.67	-2735.13	612.934	0	0
OG0006314	-2425.15	-2664.42	478.537	0	0
OG0006314	-2425.15	-2664.42	478.537	0	0
OG0006085	-2425.11	-2594.57	338.914	0	0
OG0000767	-2422.44	-2600.32	355.759	0	0
OG0000631	-2420.36	-2706.45	572.191	0	0
OG0005624	-2420.08	-2683.82	527.472	0	0
OG0003543	-2415.33	-2680.07	529.475	0	0
OG0001269	-2410.93	-2549.23	276.593	0	0
OG0002195	-2410.89	-2632.08	442.386	0	0
OG0003575	-2409.62	-2599.26	379.278	0	0
OG0003674	-2408.66	-2655.92	494.532	0	0
OG0005721	-2406.6	-2666.45	519.707	0	0
OG0005138	-2406.5	-2649.89	486.792	0	0
OG0004093	-2406.37	-2680.14	547.54	0	0
OG0005778	-2403.78	-2596.95	386.335	0	0
OG0005458	-2403.17	-2617.33	428.314	0	0
OG0004120	-2401.73	-2615.22	426.99	0	0
OG0006064	-2399.83	-2619.68	439.699	0	0
OG0002371	-2399.4	-2560.75	322.693	0	0
OG0003462	-2393.24	-2678.14	569.802	0	0
OG0005906	-2392.41	-2704.87	624.914	0	0
OG0004607	-2389.27	-2566.38	354.215	0	0
OG0000110	-2381.22	-2630	497.551	0	0
OG0006066	-2378.8	-2682.05	606.506	0	0
OG0004097	-2375.93	-2572.87	393.882	0	0
OG0000963	-2370.35	-2664.41	588.136	0	0
OG0005892	-2368.11	-2627.45	518.675	0	0
OG0002406	-2364.4	-2621.57	514.335	0	0
OG0006121	-2364.07	-2631.3	534.463	0	0
OG0005815	-2359.98	-2594.47	468.982	0	0
OG0002880	-2359.01	-2574.1	430.18	0	0
OG0001754	-2355.77	-2581.36	451.192	0	0
OG0001346	-2353.57	-2586.29	465.436	0	0
OG0003815	-2350.64	-2505.59	309.911	0	0
OG0003172	-2347.8	-2643.3	591.007	0	0
OG0006326	-2345.47	-2629.39	567.843	0	0
OG0006326	-2345.47	-2629.39	567.843	0	0
OG0006096	-2345.39	-2642.3	593.812	0	0
OG0003968	-2344.38	-2498	307.235	0	0
OG0002033	-2343.5	-2642.03	597.062	0	0
OG0000079	-2343.43	-2622.22	557.579	0	0
OG0000118	-2334.81	-2587.98	506.338	0	0
OG0002140	-2331.24	-2494.42	326.366	0	0
OG0002918	-2330.84	-2573.38	485.086	0	0
OG0000936	-2325.58	-2577.15	503.139	0	0
OG0004406	-2324	-2559.81	471.618	0	0
OG0004664	-2313.8	-2488.65	349.705	0	0
OG0005781	-2312.84	-2559.02	492.359	0	0
OG0005112	-2306.97	-2520.55	427.158	0	0
OG0005129	-2304.87	-2528.95	448.166	0	0
OG0004888	-2303.05	-2567.87	529.629	0	0
OG0003210	-2302.39	-2484.59	364.403	0	0
OG0004265	-2299.7	-2529.05	458.709	0	0
OG0003947	-2299.45	-2581.77	564.638	0	0
OG0000967	-2297.75	-2518.56	441.628	0	0
OG0005677	-2294.32	-2541.14	493.655	0	0
OG0006004	-2290.5	-2503.64	426.285	0	0
OG0002789	-2289.01	-2498.33	418.64	0	0
OG0005653	-2288.84	-2550.2	522.721	0	0
OG0003763	-2287.11	-2490.12	406.021	0	0
OG0000707	-2287	-2502.27	430.542	0	0
OG0001100	-2286.21	-2523.09	473.762	0	0
OG0002617	-2286.17	-2496.11	419.876	0	0
OG0005672	-2283.91	-2484.48	401.137	0	0
OG0004758	-2282.62	-2509.86	454.475	0	0
OG0004863	-2281.8	-2475.44	387.285	0	0
OG0006316	-2280.65	-2475.65	389.996	0	0
OG0006316	-2280.65	-2475.65	389.996	0	0
OG0004412	-2278.61	-2497.69	438.15	0	0
OG0004176	-2278.56	-2471.88	386.646	0	0
OG0005816	-2276.17	-2511.97	471.592	0	0
OG0006254	-2266.53	-2543.99	554.913	0	0
OG0003352	-2265.61	-2499.42	467.621	0	0
OG0002748	-2264.62	-2549.25	569.264	0	0
OG0002148	-2261.63	-2400.7	278.138	0	0
OG0005745	-2259.44	-2470.81	422.741	0	0
OG0000041	-2258.28	-2517.8	519.05	0	0
OG0005687	-2255.41	-2517.92	525.019	0	0
OG0004563	-2255.06	-2456.26	402.39	0	0
OG0005175	-2254.15	-2444.29	380.276	0	0
OG0005555	-2252.62	-2463.88	422.527	0	0
OG0005405	-2252.58	-2560	614.832	0	0
OG0006088	-2252.58	-2477.89	450.626	0	0
OG0000685	-2251.71	-2380.45	257.489	0	0
OG0001194	-2248.61	-2465.13	433.054	0	0
OG0006238	-2246.23	-2417.9	343.345	0	0
OG0000723	-2245.69	-2437.31	383.237	0	0
OG0000455	-2244.23	-2472	455.545	0	0
OG0000504	-2243.15	-2500.82	515.347	0	0
OG0000742	-2239.63	-2461.41	443.574	0	0
OG0001861	-2238.38	-2424.71	372.649	0	0
OG0004182	-2238.07	-2443.39	410.649	0	0
OG0005958	-2236.61	-2455.29	437.371	0	0
OG0000815	-2234.78	-2448.67	427.772	0	0
OG0000832	-2232.81	-2425.41	385.198	0	0
OG0001411	-2229.7	-2423.76	388.116	0	0
OG0005577	-2229.37	-2467.43	476.123	0	0
OG0005667	-2229.12	-2468.08	477.924	0	0
OG0005980	-2228.84	-2445.53	433.373	0	0
OG0004348	-2225.8	-2480.05	508.5	0	0
OG0003949	-2223.97	-2436.63	425.327	0	0
OG0006396	-2219.73	-2477.79	516.119	0	0
OG0006396	-2219.73	-2477.79	516.119	0	0
OG0005272	-2210.64	-2477.3	533.306	0	0
OG0001862	-2210.64	-2442.67	464.066	0	0
OG0000758	-2206.17	-2491.11	569.876	0	0
OG0000394	-2204.62	-2474.27	539.297	0	0
OG0002782	-2203.16	-2427.23	448.136	0	0
OG0005586	-2202.71	-2485.19	564.969	0	0
OG0001607	-2202.66	-2437.1	468.884	0	0
OG0004326	-2202	-2438.39	472.784	0	0
OG0005098	-2200.09	-2402.31	404.447	0	0
OG0003341	-2199.43	-2332.26	265.66	0	0
OG0005079	-2199.33	-2419.68	440.702	0	0
OG0002098	-2199.07	-2376.8	355.466	0	0
OG0004334	-2198.55	-2411.32	425.54	0	0
OG0006183	-2192.56	-2460.12	535.121	0	0
OG0003539	-2191.68	-2408.35	433.347	0	0
OG0002342	-2190.6	-2385.57	389.933	0	0
OG0006352	-2187.65	-2415.37	455.446	0	0
OG0006352	-2187.65	-2415.37	455.446	0	0
OG0000956	-2187.22	-2475.31	576.181	0	0
OG0006368	-2186.61	-2393.02	412.815	0	0
OG0006368	-2186.61	-2393.02	412.815	0	0
OG0002536	-2181.85	-2343.81	323.916	0	0
OG0000093	-2181.79	-2357.89	352.182	0	0
OG0000572	-2175.37	-2411.65	472.551	0	0
OG0000836	-2172.31	-2421.46	498.3	0	0
OG0004807	-2171.87	-2435.76	527.787	0	0
OG0005052	-2171.2	-2419.9	497.406	0	0
OG0006032	-2168.73	-2315.82	294.181	0	0
OG0004724	-2168.63	-2439.33	541.395	0	0
OG0002781	-2168.46	-2407.42	477.916	0	0
OG0001134	-2167.55	-2386.42	437.744	0	0
OG0005213	-2165.55	-2401.55	472.004	0	0
OG0004070	-2165.48	-2416.96	502.972	0	0
OG0001868	-2165.44	-2440.73	550.587	0	0
OG0004583	-2164.88	-2385.11	440.471	0	0
OG0006205	-2163.91	-2358.43	389.023	0	0
OG0003118	-2163.84	-2431.08	534.488	0	0
OG0004459	-2162.88	-2333.3	340.84	0	0
OG0003145	-2160.81	-2372.32	423.014	0	0
OG0003149	-2160.74	-2358.07	394.663	0	0
OG0003963	-2160.39	-2364.52	408.253	0	0
OG0004905	-2159.41	-2382.26	445.703	0	0
OG0004605	-2158.12	-2357.45	398.677	0	0
OG0005189	-2157.58	-2329.41	343.658	0	0
OG0005244	-2157.28	-2440.13	565.71	0	0
OG0002358	-2156.34	-2286.69	260.702	0	0
OG0000434	-2156.11	-2371.5	430.783	0	0
OG0006317	-2152.03	-2420.52	536.991	0	0
OG0006317	-2152.03	-2420.52	536.991	0	0
OG0003588	-2151.68	-2363.95	424.532	0	0
OG0004477	-2149.61	-2371.49	443.763	0	0
OG0003876	-2148.3	-2361.65	426.7	0	0
OG0006157	-2147.05	-2352.03	409.967	0	0
OG0005237	-2145.86	-2395.71	499.705	0	0
OG0001126	-2142.85	-2325.26	364.831	0	0
OG0004320	-2138.49	-2376.39	475.789	0	0
OG0004544	-2136.39	-2323.3	373.822	0	0
OG0002647	-2133.91	-2385.2	502.582	0	0
OG0000354	-2133.37	-2312.05	357.372	0	0
OG0001966	-2133.21	-2317.97	369.522	0	0
OG0000638	-2132.73	-2326.41	387.36	0	0
OG0006163	-2130.74	-2369.22	476.948	0	0
OG0005131	-2129.68	-2360.34	461.305	0	0
OG0000580	-2129.04	-2362.37	466.66	0	0
OG0004196	-2128.86	-2259.02	260.326	0	0
OG0003722	-2127.47	-2358.15	461.363	0	0
OG0004730	-2126.74	-2191.66	129.839	0	0
OG0004896	-2126.34	-2289.82	326.964	0	0
OG0003706	-2125.74	-2354.56	457.634	0	0
OG0002982	-2125.29	-2398.16	545.732	0	0
OG0000192	-2123.39	-2314.26	381.724	0	0
OG0005949	-2123.16	-2337.24	428.154	0	0
OG0006323	-2122.89	-2349.09	452.409	0	0
OG0006323	-2122.89	-2349.09	452.409	0	0
OG0004596	-2122.59	-2361.11	477.045	0	0
OG0003058	-2122.39	-2341.8	438.823	0	0
OG0003001	-2120.65	-2363.91	486.516	0	0
OG0006304	-2119.83	-2322.55	405.445	0	0
OG0000062	-2119.28	-2383.56	528.543	0	0
OG0004264	-2117.69	-2299.26	363.137	0	0
OG0004743	-2115.48	-2295.16	359.359	0	0
OG0002178	-2112.83	-2324.77	423.876	0	0
OG0004565	-2112.67	-2292.63	359.908	0	0
OG0006300	-2110	-2365.41	510.819	0	0
OG0001060	-2108.2	-2328.92	441.449	0	0
OG0002631	-2107.79	-2307.88	400.163	0	0
OG0005904	-2107.32	-2303.5	392.341	0	0
OG0002514	-2106.84	-2280.04	346.408	0	0
OG0003459	-2102.98	-2342.02	478.074	0	0
OG0000168	-2101.56	-2350.41	497.705	0	0
OG0003669	-2101.22	-2345.49	488.544	0	0
OG0000818	-2099.59	-2209.58	219.971	0	0
OG0005435	-2099.52	-2321.83	444.623	0	0
OG0003839	-2099.3	-2270.23	341.856	0	0
OG0002149	-2098.44	-2313.35	429.807	0	0
OG0002069	-2096.96	-2323.37	452.823	0	0
OG0004102	-2096.18	-2305.05	417.738	0	0
OG0006128	-2095.18	-2386.25	582.145	0	0
OG0003606	-2093.97	-2299.41	410.892	0	0
OG0005430	-2092.02	-2316.5	448.969	0	0
OG0001850	-2091.39	-2340.14	497.507	0	0
OG0004714	-2090.3	-2328.47	476.331	0	0
OG0004060	-2090.04	-2348.36	516.652	0	0
OG0006241	-2089.6	-2303.88	428.564	0	0
OG0003617	-2088.98	-2239.79	301.625	0	0
OG0004595	-2088.43	-2301.6	426.339	0	0
OG0004315	-2086.54	-2256.45	339.812	0	0
OG0000195	-2085.73	-2328.19	484.922	0	0
OG0004613	-2084.7	-2279.47	389.53	0	0
OG0004537	-2084.48	-2311.7	454.431	0	0
OG0004158	-2083.09	-2245.87	325.556	0	0
OG0005150	-2082.43	-2283	401.134	0	0
OG0004133	-2081.73	-2281.63	399.803	0	0
OG0002548	-2079.4	-2257.31	355.821	0	0
OG0005753	-2079.19	-2301.31	444.243	0	0
OG0003209	-2076.07	-2314.33	476.527	0	0
OG0004894	-2075.21	-2307.58	464.734	0	0
OG0006134	-2074.93	-2201.52	253.185	0	0
OG0005735	-2074.49	-2340.43	531.882	0	0
OG0005726	-2073.36	-2260.64	374.575	0	0
OG0004078	-2071.11	-2256.71	371.182	0	0
OG0005952	-2068.66	-2271.57	405.818	0	0
OG0006237	-2067.36	-2273.69	412.648	0	0
OG0005605	-2066.97	-2249.67	365.391	0	0
OG0006007	-2065.66	-2263.7	396.095	0	0
OG0004612	-2063.82	-2332.25	536.867	0	0
OG0005252	-2063.76	-2282.73	437.929	0	0
OG0000674	-2061.29	-2257.22	391.86	0	0
OG0004866	-2059.23	-2217.08	315.688	0	0
OG0004411	-2055.95	-2254.49	397.083	0	0
OG0001217	-2052.31	-2272.57	440.523	0	0
OG0006307	-2050.22	-2222.68	344.921	0	0
OG0005974	-2049.85	-2311.77	523.837	0	0
OG0005236	-2049.07	-2229.9	361.662	0	0
OG0003834	-2047.11	-2283.77	473.324	0	0
OG0000186	-2046.56	-2211.58	330.037	0	0
OG0005403	-2044.34	-2303.06	517.436	0	0
OG0000705	-2043.18	-2242.01	397.657	0	0
OG0003784	-2039.76	-2223.35	367.175	0	0
OG0002577	-2035.26	-2270.22	469.924	0	0
OG0003884	-2033.49	-2282.35	497.707	0	0
OG0004225	-2032.32	-2178.98	293.303	0	0
OG0005493	-2031.88	-2204.33	344.893	0	0
OG0003994	-2030.92	-2265.37	468.9	0	0
OG0002673	-2028.78	-2277.07	496.586	0	0
OG0000251	-2027.55	-2189.76	324.433	0	0
OG0005116	-2027.52	-2240.32	425.607	0	0
OG0005573	-2027.02	-2293.44	532.849	0	0
OG0004207	-2026.76	-2232.16	410.817	0	0
OG0002125	-2026.32	-2242.4	432.143	0	0
OG0006381	-2026.09	-2229.17	406.172	0	0
OG0006381	-2026.09	-2229.17	406.172	0	0
OG0005924	-2026.04	-2256.7	461.307	0	0
OG0004454	-2025.77	-2203.02	354.504	0	0
OG0004833	-2025.36	-2227.16	403.618	0	0
OG0003685	-2022.03	-2244.04	444.006	0	0
OG0005551	-2020.7	-2224.17	406.947	0	0
OG0005738	-2020.68	-2202.65	363.938	0	0
OG0005384	-2017.08	-2215.31	396.458	0	0
OG0001174	-2015.88	-2279.18	526.59	0	0
OG0005201	-2014.9	-2180.75	331.681	0	0
OG0003716	-2014.45	-2269.38	509.859	0	0
OG0003651	-2014.36	-2210.81	392.906	0	0
OG0004301	-2014.13	-2192.38	356.493	0	0
OG0001087	-2013.13	-2171.28	316.298	0	0
OG0005462	-2010.89	-2238.43	455.08	0	0
OG0003132	-2010.64	-2171.24	321.198	0	0
OG0006236	-2009.46	-2185.45	351.978	0	0
OG0002360	-2009.2	-2218.67	418.945	0	0
OG0002443	-2004.13	-2203.71	399.157	0	0
OG0005632	-2002.8	-2198.38	391.152	0	0
OG0000593	-2002.45	-2241.26	477.606	0	0
OG0001423	-2000.75	-2190.49	379.479	0	0
OG0000589	-1997.83	-2237.09	478.514	0	0
OG0003921	-1996.57	-2150.67	308.192	0	0
OG0005105	-1996.08	-2223.78	455.402	0	0
OG0000098	-1995.83	-2186.15	380.637	0	0
OG0005488	-1995.35	-2190.7	390.692	0	0
OG0002777	-1995.3	-2158.44	326.278	0	0
OG0005028	-1995.08	-2207.74	425.317	0	0
OG0006297	-1994.66	-2162.31	335.304	0	0
OG0004089	-1993.49	-2190.26	393.545	0	0
OG0000228	-1990.64	-2187.53	393.774	0	0
OG0001131	-1989.27	-2253.66	528.779	0	0
OG0002463	-1988.01	-2220.12	464.212	0	0
OG0003431	-1984.26	-2213.23	457.938	0	0
OG0004835	-1984.17	-2203.84	439.33	0	0
OG0003836	-1981.67	-2172.59	381.848	0	0
OG0006103	-1978.56	-2203.44	449.762	0	0
OG0005971	-1978.15	-2164.03	371.763	0	0
OG0004067	-1975.28	-2171.89	393.222	0	0
OG0006356	-1975.18	-2246.45	542.545	0	0
OG0006356	-1975.18	-2246.45	542.545	0	0
OG0004769	-1973.07	-2217.81	489.47	0	0
OG0004721	-1972.57	-2154.81	364.486	0	0
OG0005476	-1971.61	-2187.11	430.99	0	0
OG0005598	-1970.58	-2184.32	427.474	0	0
OG0005454	-1966	-2207.9	483.796	0	0
OG0005423	-1965.76	-2119.65	307.789	0	0
OG0005798	-1963.76	-2143.5	359.494	0	0
OG0000068	-1961.5	-2168.99	414.97	0	0
OG0006217	-1960.49	-2118.94	316.904	0	0
OG0005972	-1960.38	-2151.65	382.557	0	0
OG0006344	-1956.41	-2099.52	286.211	0	0
OG0006344	-1956.41	-2099.52	286.211	0	0
OG0002062	-1954.77	-2074.95	240.343	0	0
OG0003061	-1952.18	-2142.08	379.804	0	0
OG0001004	-1951.59	-2129.18	355.179	0	0
OG0004100	-1950.95	-2171.15	440.418	0	0
OG0001954	-1950.5	-2187.57	474.14	0	0
OG0005812	-1949.76	-2113.48	327.44	0	0
OG0000176	-1948.63	-2103.25	309.247	0	0
OG0005344	-1947.3	-2161.66	428.717	0	0
OG0005366	-1944.14	-2146.39	404.501	0	0
OG0004919	-1941.12	-2142.03	401.817	0	0
OG0000633	-1936.67	-2072.13	270.922	0	0
OG0006264	-1936.24	-2129.97	387.461	0	0
OG0005387	-1934.33	-2132.41	396.146	0	0
OG0005996	-1932.46	-2119.62	374.304	0	0
OG0004245	-1931.29	-2128.89	395.2	0	0
OG0005522	-1927.1	-2091.15	328.1	0	0
OG0005106	-1925.82	-2225.53	599.405	0	0
OG0004353	-1923.84	-2101.51	355.351	0	0
OG0002947	-1921.4	-2087.87	332.952	0	0
OG0003382	-1920.61	-2163.46	485.706	0	0
OG0005760	-1920.3	-2114.09	387.59	0	0
OG0005192	-1920.02	-2120.6	401.167	0	0
OG0006070	-1917.86	-2119.4	403.088	0	0
OG0001955	-1916.7	-2118.37	403.357	0	0
OG0002024	-1911.27	-2129.69	436.837	0	0
OG0002837	-1909.22	-2091.8	365.165	0	0
OG0003632	-1908.78	-2074.68	331.81	0	0
OG0005840	-1907.39	-2101.73	388.682	0	0
OG0000276	-1906.04	-2039.5	266.916	0	0
OG0002870	-1904.52	-2138.93	468.822	0	0
OG0003224	-1903.25	-2115.77	425.027	0	0
OG0000730	-1899.88	-2095.95	392.131	0	0
OG0003416	-1899.47	-2074.49	350.043	0	0
OG0005339	-1897.99	-2041.72	287.469	0	0
OG0004304	-1894.76	-2119.6	449.693	0	0
OG0005086	-1894.14	-2105.28	422.272	0	0
OG0004586	-1892.4	-2044.81	304.817	0	0
OG0004221	-1889.84	-2100.27	420.85	0	0
OG0004416	-1888.25	-2040.69	304.881	0	0
OG0004134	-1888.18	-2029.82	283.272	0	0
OG0006041	-1887.63	-2066.14	357.037	0	0
OG0005185	-1881.6	-2023.9	284.601	0	0
OG0005670	-1881.36	-2071.74	380.753	0	0
OG0001347	-1880.4	-2054.14	347.469	0	0
OG0000687	-1874.92	-2087.53	425.231	0	0
OG0001348	-1871.45	-2051.64	360.388	0	0
OG0005884	-1870.88	-2046.19	350.619	0	0
OG0002796	-1869.87	-2037.55	335.366	0	0
OG0006255	-1867.72	-2057.51	379.574	0	0
OG0006270	-1865.6	-2024.65	318.103	0	0
OG0000087	-1864.56	-2063.81	398.509	0	0
OG0002863	-1863.82	-2052	376.344	0	0
OG0003073	-1862.07	-2042.69	361.24	0	0
OG0000482	-1859.75	-2072.88	426.269	0	0
OG0003405	-1858.67	-2023.3	329.274	0	0
OG0002175	-1858.29	-2014.43	312.288	0	0
OG0006253	-1857.88	-2046.76	377.761	0	0
OG0001463	-1857.18	-2041.51	368.674	0	0
OG0005603	-1856.76	-2031.98	350.428	0	0
OG0006177	-1855.66	-2091.77	472.202	0	0
OG0005301	-1855.3	-2032.34	354.099	0	0
OG0004508	-1855.07	-2042.23	374.319	0	0
OG0006129	-1854.92	-2044.06	378.284	0	0
OG0005217	-1854.08	-2000.05	291.927	0	0
OG0000577	-1853.23	-1956.92	207.377	0	0
OG0000564	-1853.19	-2033.92	361.448	0	0
OG0005517	-1852.86	-2045	384.28	0	0
OG0005180	-1852.76	-2078.71	451.889	0	0
OG0005504	-1852.35	-2019.97	335.235	0	0
OG0002877	-1846.14	-2057.52	422.776	0	0
OG0004156	-1846.02	-2038.65	385.26	0	0
OG0005578	-1845.65	-2030.23	369.166	0	0
OG0002876	-1845.63	-2047.9	404.55	0	0
OG0004641	-1844.13	-1991.81	295.371	0	0
OG0002103	-1843.34	-2044.05	401.433	0	0
OG0002985	-1842.83	-1928.27	170.896	0	0
OG0002311	-1841.88	-2135.83	587.881	0	0
OG0001234	-1841.78	-2028.86	374.159	0	0
OG0004624	-1841.18	-2000.77	319.186	0	0
OG0000760	-1840.47	-1985.2	289.452	0	0
OG0004231	-1839.09	-2031.37	384.564	0	0
OG0004611	-1837.41	-1989.81	304.812	0	0
OG0001266	-1836.84	-2013.82	353.961	0	0
OG0004526	-1835.33	-2008.83	347.01	0	0
OG0004165	-1834.18	-1920.97	173.58	0	0
OG0005109	-1833.81	-2044.97	422.32	0	0
OG0003724	-1833.7	-2052.21	437.017	0	0
OG0003036	-1832.95	-2074.34	482.787	0	0
OG0004382	-1831.99	-2013.1	362.229	0	0
OG0004073	-1829.74	-1979.02	298.547	0	0
OG0002650	-1828.98	-2077.42	496.875	0	0
OG0005035	-1828.57	-2014.61	372.087	0	0
OG0005583	-1826.5	-2067.48	481.947	0	0
OG0001256	-1826.17	-2028.1	403.871	0	0
OG0000144	-1825.98	-2027.46	402.962	0	0
OG0004918	-1823.48	-1987.14	327.322	0	0
OG0004222	-1822.02	-1965.02	286.009	0	0
OG0002414	-1821.3	-2046.42	450.246	0	0
OG0003010	-1820.01	-2034.84	429.669	0	0
OG0002829	-1818.88	-2025.82	413.871	0	0
OG0006276	-1817.65	-2038.8	442.307	0	0
OG0004181	-1815.37	-1973.88	317.011	0	0
OG0002023	-1814.65	-1937.12	244.93	0	0
OG0004547	-1814.62	-1957.45	285.665	0	0
OG0004229	-1814.11	-1964.86	301.493	0	0
OG0006385	-1813.64	-2021.28	415.295	0	0
OG0006385	-1813.64	-2021.28	415.295	0	0
OG0002071	-1811.87	-1997.4	371.07	0	0
OG0000558	-1810.55	-2036.25	451.396	0	0
OG0005945	-1806.2	-1989.9	367.401	0	0
OG0004897	-1805.82	-1973.93	336.224	0	0
OG0000676	-1805.75	-1991.38	371.261	0	0
OG0004808	-1805.09	-1964.2	318.226	0	0
OG0004439	-1804.9	-1988.12	366.459	0	0
OG0000487	-1803.58	-1931.53	255.899	0	0
OG0006164	-1801.22	-2040.68	478.911	0	0
OG0003384	-1797.71	-2023.33	451.241	0	0
OG0005425	-1797.56	-1970.71	346.3	0	0
OG0002150	-1797.16	-2036.74	479.166	0	0
OG0001010	-1796.96	-1967.92	341.935	0	0
OG0004446	-1796.95	-1899.29	204.684	0	0
OG0003877	-1795.01	-1967.77	345.517	0	0
OG0004494	-1794.16	-1987.89	387.462	0	0
OG0005279	-1794.13	-1943.43	298.619	0	0
OG0002664	-1793.11	-1969.69	353.158	0	0
OG0004761	-1789.99	-2006.65	433.327	0	0
OG0005688	-1789.13	-1982.31	386.368	0	0
OG0004572	-1789.05	-1935.46	292.827	0	0
OG0004826	-1789.03	-1934.79	291.516	0	0
OG0001876	-1788.84	-1962.69	347.703	0	0
OG0003677	-1787.35	-1990.07	405.453	0	0
OG0002370	-1786.72	-1968.31	363.187	0	0
OG0002809	-1785.32	-1904.89	239.145	0	0
OG0004523	-1784.99	-1949.74	329.492	0	0
OG0005995	-1784.72	-1972.09	374.737	0	0
OG0002662	-1784.15	-1964.03	359.763	0	0
OG0004880	-1781.68	-1927.37	291.38	0	0
OG0000224	-1781.18	-1998	433.628	0	0
OG0003501	-1780.82	-1933.11	304.577	0	0
OG0004366	-1774.75	-1944.52	339.545	0	0
OG0003766	-1773.84	-1931.36	315.029	0	0
OG0002924	-1771.88	-1902.78	261.798	0	0
OG0000610	-1770.43	-1964.53	388.19	0	0
OG0001507	-1769.57	-1968.53	397.921	0	0
OG0001624	-1769.52	-1898.18	257.326	0	0
OG0000753	-1764.86	-1910.67	291.625	0	0
OG0004825	-1764.84	-1910.29	290.91	0	0
OG0002003	-1763.27	-1932.15	337.763	0	0
OG0001735	-1762.28	-1943.49	362.42	0	0
OG0003770	-1761.82	-1917.83	312.024	0	0
OG0004113	-1761.37	-1956.54	390.34	0	0
OG0003781	-1759.69	-1969.28	419.179	0	0
OG0005509	-1759.51	-1917.33	315.641	0	0
OG0004194	-1759.3	-1861.07	203.541	0	0
OG0003687	-1758.65	-1969.37	421.428	0	0
OG0006202	-1758.29	-1933.82	351.062	0	0
OG0001865	-1757.79	-1912.18	308.783	0	0
OG0004726	-1754.11	-1903.11	297.997	0	0
OG0001389	-1752.1	-1941.49	378.798	0	0
OG0005390	-1751.28	-1963.34	424.13	0	0
OG0003991	-1749.88	-1841.03	182.308	0	0
OG0006318	-1749.39	-1931.06	363.349	0	0
OG0006318	-1749.39	-1931.06	363.349	0	0
OG0001386	-1748.57	-1867.26	237.389	0	0
OG0000092	-1748.5	-1922.03	347.067	0	0
OG0005703	-1748.49	-1896.03	295.069	0	0
OG0003372	-1747.76	-1965.37	435.221	0	0
OG0004781	-1744.77	-1949.69	409.822	0	0
OG0006281	-1743.23	-1977.28	468.107	0	0
OG0001724	-1740.86	-1924.69	367.665	0	0
OG0006322	-1739.54	-1921.08	363.079	0	0
OG0006322	-1739.54	-1921.08	363.079	0	0
OG0003430	-1738.09	-1910.96	345.732	0	0
OG0004756	-1737.63	-1967.59	459.911	0	0
OG0006119	-1737.14	-1915.74	357.194	0	0
OG0005686	-1736.99	-1944.18	414.388	0	0
OG0002834	-1736.35	-1914.29	355.873	0	0
OG0003133	-1736.29	-1863.03	253.484	0	0
OG0005883	-1734.15	-1949.44	430.576	0	0
OG0001243	-1733.34	-1893.74	320.803	0	0
OG0001196	-1731.85	-1898.4	333.115	0	0
OG0004538	-1731.03	-1891.32	320.578	0	0
OG0004340	-1730.54	-1861.24	261.401	0	0
OG0003169	-1729.53	-1881.96	304.854	0	0
OG0004621	-1729.32	-1916.31	373.969	0	0
OG0005429	-1728.84	-1898.08	338.485	0	0
OG0000215	-1727.84	-1904	352.304	0	0
OG0004200	-1727.63	-1917.89	380.517	0	0
OG0003346	-1723.61	-1910.71	374.185	0	0
OG0001638	-1720.83	-1917.59	393.516	0	0
OG0004111	-1720.1	-1942.51	444.818	0	0
OG0005606	-1719.66	-1916.53	393.756	0	0
OG0000987	-1719.1	-1881.06	323.905	0	0
OG0006329	-1716.51	-1866.87	300.717	0	0
OG0006329	-1716.51	-1866.87	300.717	0	0
OG0001006	-1715.92	-1798.34	164.849	0	0
OG0002420	-1715.79	-1869.51	307.437	0	0
OG0006231	-1714.83	-1839.48	249.289	0	0
OG0005843	-1713.6	-1888.84	350.492	0	0
OG0005931	-1713.38	-1823.97	221.188	0	0
OG0002522	-1713.16	-1917.97	409.618	0	0
OG0005614	-1712.91	-1836.33	246.85	0	0
OG0003594	-1712.09	-1861.22	298.268	0	0
OG0003583	-1711.08	-1864.67	307.195	0	0
OG0002776	-1707.65	-1870.35	325.388	0	0
OG0003653	-1706.98	-1822.61	231.264	0	0
OG0005157	-1705.72	-1910.14	408.826	0	0
OG0005100	-1703.25	-1877.16	347.806	0	0
OG0003659	-1702.26	-1852.08	299.639	0	0
OG0006341	-1702.16	-1867.1	329.889	0	0
OG0006341	-1702.16	-1867.1	329.889	0	0
OG0005965	-1700	-1892.13	384.26	0	0
OG0005467	-1698.17	-1898.16	399.971	0	0
OG0004295	-1697.66	-1852.89	310.457	0	0
OG0005783	-1697.11	-1858.42	322.632	0	0
OG0006185	-1694.87	-1853.55	317.367	0	0
OG0002932	-1693.82	-1788.25	188.853	0	0
OG0005457	-1693.46	-1920.09	453.248	0	0
OG0005582	-1691.57	-1853.97	324.791	0	0
OG0002494	-1688.07	-1817.62	259.092	0	0
OG0004917	-1686.15	-1855.71	339.122	0	0
OG0001999	-1685.98	-1846.42	320.87	0	0
OG0003020	-1685.42	-1924	477.158	0	0
OG0002926	-1683.96	-1854.95	341.988	0	0
OG0000516	-1683.15	-1825.36	284.426	0	0
OG0004473	-1681.86	-1819.93	276.154	0	0
OG0003419	-1680.51	-1872.38	383.757	0	0
OG0001201	-1678.27	-1864.36	372.18	0	0
OG0003168	-1676.78	-1806.23	258.883	0	0
OG0003117	-1674.54	-1801.76	254.443	0	0
OG0001984	-1672.21	-1835.95	327.477	0	0
OG0006167	-1671.21	-1865.6	388.774	0	0
OG0003414	-1667.49	-1835.88	336.771	0	0
OG0005775	-1666.97	-1768.98	204.018	0	0
OG0002951	-1666.38	-1843.25	353.723	0	0
OG0005096	-1666.28	-1871.99	411.418	0	0
OG0004192	-1665.67	-1814.13	296.91	0	0
OG0000360	-1665.1	-1861.38	392.559	0	0
OG0002025	-1664.83	-1768.27	206.881	0	0
OG0000868	-1663.93	-1812.85	297.851	0	0
OG0003821	-1663.75	-1811.71	295.911	0	0
OG0003866	-1663.05	-1856	385.906	0	0
OG0001703	-1662.45	-1797.85	270.802	0	0
OG0004344	-1662.02	-1753.16	182.275	0	0
OG0001014	-1654.53	-1829.89	350.715	0	0
OG0002628	-1654.09	-1806.07	303.967	0	0
OG0003675	-1652.22	-1788.38	272.327	0	0
OG0005813	-1651.75	-1782.06	260.611	0	0
OG0002132	-1650.16	-1858.17	416.028	0	0
OG0001223	-1649.98	-1795.21	290.455	0	0
OG0003136	-1649.35	-1867.01	435.326	0	0
OG0004768	-1649.06	-1785.86	273.589	0	0
OG0004874	-1647.44	-1807.64	320.403	0	0
OG0005225	-1646.86	-1767.57	241.423	0	0
OG0005333	-1646.67	-1825.28	357.22	0	0
OG0003433	-1646.26	-1814.43	336.354	0	0
OG0004419	-1645.08	-1831.47	372.773	0	0
OG0000289	-1643.72	-1762.22	236.997	0	0
OG0005569	-1643.42	-1752.69	218.549	0	0
OG0005646	-1640.62	-1820.17	359.09	0	0
OG0003135	-1640.16	-1754.65	228.985	0	0
OG0003526	-1639.65	-1848.71	418.126	0	0
OG0003752	-1638.87	-1833.46	389.177	0	0
OG0004471	-1638.81	-1823.12	368.627	0	0
OG0005352	-1636.74	-1751.29	229.095	0	0
OG0004580	-1635.19	-1805.35	340.315	0	0
OG0006240	-1631.94	-1826.61	389.344	0	0
OG0003986	-1630.89	-1769.22	276.655	0	0
OG0002520	-1630.8	-1730.32	199.037	0	0
OG0002182	-1630.61	-1785.19	309.144	0	0
OG0001110	-1630.37	-1841.35	421.967	0	0
OG0000359	-1630.27	-1858.96	457.393	0	0
OG0004180	-1628.95	-1817.04	376.182	0	0
OG0004774	-1628.89	-1780.96	304.148	0	0
OG0002114	-1628.83	-1791.14	324.616	0	0
OG0005570	-1628.68	-1789.7	322.041	0	0
OG0003897	-1627.05	-1779.47	304.844	0	0
OG0005307	-1626.75	-1749.93	246.363	0	0
OG0000702	-1625.79	-1782.75	313.919	0	0
OG0004116	-1625.33	-1816.98	383.306	0	0
OG0005021	-1623.6	-1778.83	310.466	0	0
OG0004456	-1621.29	-1785.95	329.319	0	0
OG0001130	-1620.79	-1747.84	254.091	0	0
OG0004799	-1619.61	-1837.67	436.13	0	0
OG0001603	-1619.27	-1723.19	207.85	0	0
OG0001428	-1618.9	-1721.58	205.356	0	0
OG0006020	-1618.27	-1807.92	379.313	0	0
OG0002550	-1616.38	-1817.83	402.881	0	0
OG0001731	-1615.93	-1771.72	311.572	0	0
OG0004433	-1613.02	-1762.52	298.994	0	0
OG0002666	-1612.55	-1816.77	408.446	0	0
OG0005579	-1611.7	-1810.43	397.453	0	0
OG0005162	-1608.06	-1815.24	414.365	0	0
OG0002109	-1607.93	-1767.48	319.098	0	0
OG0003712	-1606.15	-1767.66	323.011	0	0
OG0001342	-1606.08	-1747.08	282.002	0	0
OG0006203	-1605.23	-1784.15	357.847	0	0
OG0005363	-1604.95	-1754.66	299.431	0	0
OG0005137	-1604.63	-1766.45	323.641	0	0
OG0000460	-1603.96	-1794.6	381.281	0	0
OG0006382	-1603.49	-1728.14	249.306	0	0
OG0006382	-1603.49	-1728.14	249.306	0	0
OG0002210	-1602.72	-1724.43	243.415	0	0
OG0005597	-1602.72	-1733.5	261.567	0	0
OG0001253	-1600.18	-1744.24	288.134	0	0
OG0005970	-1598.5	-1752.86	308.723	0	0
OG0000522	-1597.65	-1775.83	356.363	0	0
OG0003094	-1596.66	-1794.03	394.731	0	0
OG0002677	-1594.96	-1769.57	349.211	0	0
OG0003079	-1594.93	-1763.33	336.803	0	0
OG0005443	-1593.1	-1785.75	385.3	0	0
OG0004867	-1591.36	-1773.18	363.644	0	0
OG0000200	-1591.24	-1709.01	235.537	0	0
OG0000175	-1587.77	-1744.6	313.66	0	0
OG0004166	-1583.73	-1744.41	321.375	0	0
OG0002063	-1581.22	-1735.62	308.802	0	0
OG0004151	-1580.85	-1739.79	317.871	0	0
OG0002508	-1578.73	-1697.52	237.583	0	0
OG0004373	-1578.48	-1762.43	367.908	0	0
OG0000800	-1576.02	-1764.5	376.97	0	0
OG0005533	-1574.72	-1733.96	318.495	0	0
OG0001035	-1573.46	-1687.08	227.236	0	0
OG0005265	-1573.07	-1769.84	393.532	0	0
OG0003194	-1572.9	-1751.66	357.53	0	0
OG0002656	-1571.47	-1749.79	356.646	0	0
OG0005907	-1570.37	-1720.66	300.594	0	0
OG0000681	-1568.45	-1693.55	250.21	0	0
OG0003062	-1566.19	-1733.73	335.074	0	0
OG0000563	-1566.17	-1747.25	362.164	0	0
OG0004305	-1565.88	-1756.47	381.189	0	0
OG0004657	-1565.81	-1705	278.376	0	0
OG0006058	-1565.44	-1700.48	270.086	0	0
OG0005285	-1564.47	-1761.68	394.435	0	0
OG0005219	-1561.33	-1719.3	315.941	0	0
OG0003024	-1560	-1696.98	273.95	0	0
OG0002122	-1556.81	-1717.55	321.491	0	0
OG0002462	-1556.37	-1702.42	292.092	0	0
OG0004452	-1556.09	-1738.36	364.539	0	0
OG0003975	-1556.07	-1664.02	215.913	0	0
OG0005668	-1555.59	-1746.19	381.194	0	0
OG0002310	-1554.18	-1674.7	241.05	0	0
OG0006057	-1553.24	-1728.94	351.389	0	0
OG0003189	-1553.08	-1628.02	149.876	0	0
OG0003946	-1552.91	-1707.54	309.254	0	0
OG0004744	-1552.17	-1633.1	161.865	0	0
OG0005422	-1550.13	-1688.7	277.134	0	0
OG0004088	-1549.6	-1749.07	398.931	0	0
OG0006165	-1547.69	-1707.5	319.622	0	0
OG0003374	-1546.09	-1711.72	331.266	0	0
OG0002040	-1545.12	-1676.02	261.812	0	0
OG0005554	-1544.61	-1694.8	300.395	0	0
OG0005825	-1544.24	-1744.48	400.477	0	0
OG0000553	-1543.17	-1662.51	238.679	0	0
OG0006123	-1542.16	-1723.33	362.347	0	0
OG0001495	-1541.73	-1692.46	301.464	0	0
OG0005823	-1541.26	-1699.62	316.729	0	0
OG0004511	-1541.03	-1685.47	288.895	0	0
OG0000120	-1540.7	-1645.14	208.886	0	0
OG0000724	-1540.63	-1757.05	432.848	0	0
OG0005935	-1540.17	-1694.01	307.671	0	0
OG0003471	-1538.58	-1730.16	383.162	0	0
OG0000669	-1536.83	-1658.98	244.293	0	0
OG0004733	-1534.93	-1611.43	152.997	0	0
OG0005634	-1533.67	-1690.74	314.153	0	0
OG0004837	-1533.28	-1693.19	319.821	0	0
OG0005249	-1532.35	-1630.97	197.235	0	0
OG0002134	-1529.79	-1644.48	229.385	0	0
OG0004853	-1526.9	-1655.06	256.313	0	0
OG0005398	-1524.21	-1679.28	310.142	0	0
OG0006299	-1523.57	-1688.71	330.273	0	0
OG0003852	-1521.81	-1694.16	344.699	0	0
OG0002913	-1521.26	-1672.86	303.206	0	0
OG0004405	-1520.59	-1642.61	244.028	0	0
OG0004792	-1518.89	-1697.09	356.403	0	0
OG0001610	-1517.85	-1644.04	252.381	0	0
OG0005434	-1517.79	-1660.76	285.944	0	0
OG0005527	-1515.74	-1705.06	378.625	0	0
OG0006142	-1514.09	-1597.1	166.022	0	0
OG0003756	-1512.6	-1631.5	237.808	0	0
OG0003379	-1512.05	-1640.92	257.736	0	0
OG0001567	-1511.11	-1660.16	298.1	0	0
OG0001301	-1510.09	-1644.49	268.798	0	0
OG0004760	-1509.53	-1696.22	373.378	0	0
OG0005092	-1509.38	-1623.49	228.207	0	0
OG0004716	-1506.7	-1646.42	279.438	0	0
OG0005273	-1506.09	-1651.42	290.661	0	0
OG0006257	-1505.11	-1662.77	315.305	0	0
OG0004570	-1503.42	-1667.09	327.333	0	0
OG0000475	-1502.93	-1646.64	287.405	0	0
OG0006081	-1502.85	-1686.37	367.039	0	0
OG0005706	-1502.73	-1662.84	320.214	0	0
OG0000395	-1502.32	-1679.68	354.721	0	0
OG0003333	-1501.26	-1599.83	197.133	0	0
OG0002451	-1500.96	-1636.96	271.999	0	0
OG0001851	-1500.87	-1613.49	225.24	0	0
OG0000561	-1500.49	-1622.02	243.058	0	0
OG0002802	-1498.25	-1662.22	327.942	0	0
OG0003977	-1497.69	-1649.5	303.628	0	0
OG0004084	-1497.44	-1736.69	478.501	0	0
OG0003782	-1497.3	-1648.22	301.839	0	0
OG0005716	-1496.45	-1597.72	202.553	0	0
OG0005031	-1495.47	-1620.9	250.861	0	0
OG0000157	-1495.24	-1626.86	263.231	0	0
OG0005277	-1495.04	-1663.06	336.051	0	0
OG0005088	-1493.95	-1657.71	327.526	0	0
OG0000329	-1492.93	-1637.75	289.63	0	0
OG0002547	-1491.73	-1645.9	308.341	0	0
OG0005205	-1491.3	-1624.35	266.082	0	0
OG0005253	-1491.21	-1658.73	335.05	0	0
OG0001873	-1491.07	-1639.35	296.557	0	0
OG0003749	-1488.99	-1618.44	258.898	0	0
OG0002405	-1487.91	-1636.81	297.809	0	0
OG0004128	-1487.77	-1587.04	198.541	0	0
OG0003488	-1487.56	-1645.79	316.478	0	0
OG0003151	-1486.77	-1664.91	356.29	0	0
OG0005561	-1485.7	-1602.06	232.717	0	0
OG0006082	-1485.46	-1634.1	297.288	0	0
OG0004447	-1482.62	-1641.91	318.569	0	0
OG0000433	-1482.51	-1613.71	262.41	0	0
OG0000747	-1480.83	-1587.54	213.406	0	0
OG0006055	-1479.09	-1637.74	317.307	0	0
OG0005762	-1478.2	-1635.5	314.591	0	0
OG0002746	-1473.72	-1618.54	289.644	0	0
OG0000452	-1472.47	-1636.22	327.512	0	0
OG0002419	-1470.91	-1598.79	255.751	0	0
OG0001613	-1470.72	-1592.96	244.469	0	0
OG0003426	-1468.03	-1601.78	267.496	0	0
OG0000486	-1466.46	-1596.04	259.172	0	0
OG0004592	-1466.37	-1631.66	330.587	0	0
OG0000051	-1466.28	-1627.09	321.617	0	0
OG0003059	-1466.22	-1596.79	261.145	0	0
OG0005725	-1466.08	-1646.89	361.613	0	0
OG0000466	-1464.62	-1582.29	235.351	0	0
OG0002894	-1463.05	-1573.86	221.605	0	0
OG0005128	-1461.05	-1549.44	176.782	0	0
OG0002427	-1460.6	-1634.33	347.466	0	0
OG0004204	-1460.47	-1606.94	292.931	0	0
OG0002384	-1460.16	-1608.61	296.907	0	0
OG0003111	-1459.98	-1623.95	327.925	0	0
OG0003439	-1459.39	-1585.78	252.793	0	0
OG0001215	-1458.24	-1655.09	393.698	0	0
OG0003667	-1458.14	-1627.29	338.289	0	0
OG0000266	-1456.98	-1617.37	320.787	0	0
OG0004437	-1456.29	-1555.12	197.666	0	0
OG0001986	-1455.06	-1632.93	355.741	0	0
OG0001098	-1453.96	-1563.33	218.737	0	0
OG0003573	-1453.95	-1644.31	380.73	0	0
OG0005321	-1453.89	-1592.54	277.304	0	0
OG0005594	-1453.83	-1669.95	432.238	0	0
OG0005389	-1452.89	-1618.95	332.121	0	0
OG0006348	-1452.77	-1607.55	309.56	0	0
OG0006348	-1452.77	-1607.55	309.56	0	0
OG0001622	-1452.47	-1556.45	207.965	0	0
OG0002620	-1452.46	-1578.27	251.623	0	0
OG0000971	-1452.08	-1583.92	263.671	0	0
OG0005748	-1448.19	-1621.19	346.016	0	0
OG0005923	-1446.79	-1585.23	276.888	0	0
OG0005717	-1445.06	-1585.93	281.746	0	0
OG0005596	-1443.91	-1594.68	301.543	0	0
OG0002528	-1443.79	-1547.11	206.627	0	0
OG0003816	-1442.67	-1602.12	318.89	0	0
OG0006168	-1442.42	-1554.13	223.408	0	0
OG0003413	-1442.12	-1649.33	414.412	0	0
OG0004885	-1442.01	-1570.9	257.786	0	0
OG0005448	-1440.78	-1574.5	267.439	0	0
OG0001212	-1440.67	-1575.39	269.451	0	0
OG0002959	-1439.7	-1627.59	375.78	0	0
OG0002794	-1439.25	-1544.4	210.303	0	0
OG0005350	-1438.52	-1621.93	366.827	0	0
OG0004764	-1437.33	-1553	231.323	0	0
OG0005889	-1435.8	-1580.42	289.226	0	0
OG0005966	-1434.99	-1644.12	418.261	0	0
OG0006048	-1434.43	-1588.12	307.37	0	0
OG0000990	-1434.11	-1590.39	312.566	0	0
OG0003052	-1434.02	-1541.36	214.682	0	0
OG0002917	-1433.65	-1571.19	275.079	0	0
OG0004491	-1433.46	-1576.13	285.34	0	0
OG0003948	-1432.7	-1540.44	215.483	0	0
OG0004311	-1432.44	-1633.47	402.055	0	0
OG0002606	-1432.43	-1566.77	268.685	0	0
OG0000328	-1431.58	-1532.89	202.624	0	0
OG0005915	-1431.3	-1544.96	227.315	0	0
OG0003807	-1430.89	-1599.2	336.609	0	0
OG0000366	-1429.17	-1598.63	338.931	0	0
OG0000711	-1428.94	-1556.11	254.333	0	0
OG0004086	-1428.65	-1563.15	268.999	0	0
OG0003599	-1428.56	-1577.95	298.767	0	0
OG0004786	-1426.6	-1559.39	265.572	0	0
OG0005179	-1425.49	-1570.56	290.141	0	0
OG0001541	-1425.34	-1611.32	371.949	0	0
OG0003193	-1424.44	-1566.49	284.1	0	0
OG0003182	-1424.01	-1556.8	265.584	0	0
OG0004763	-1422.86	-1548.89	252.057	0	0
OG0003700	-1422.74	-1553.1	260.725	0	0
OG0002994	-1422.55	-1546.16	247.233	0	0
OG0003198	-1422.3	-1542.73	240.857	0	0
OG0004601	-1420.65	-1563.94	286.576	0	0
OG0001717	-1419.01	-1559.87	281.721	0	0
OG0005016	-1418.39	-1533.27	229.757	0	0
OG0004136	-1416.12	-1517.82	203.41	0	0
OG0005318	-1415.67	-1559.45	287.576	0	0
OG0003809	-1415.11	-1566.01	301.803	0	0
OG0003220	-1414.43	-1570.23	311.596	0	0
OG0003829	-1411.57	-1573.09	323.041	0	0
OG0003691	-1411.43	-1491.36	159.875	0	0
OG0002629	-1410.59	-1596.38	371.581	0	0
OG0003076	-1410	-1593.45	366.893	0	0
OG0005882	-1409.82	-1550.91	282.174	0	0
OG0005214	-1409.81	-1567.25	314.881	0	0
OG0003638	-1409.36	-1449.89	81.0628	0	0
OG0006067	-1404.69	-1551.29	293.196	0	0
OG0006375	-1404.25	-1523.14	237.77	0	0
OG0006375	-1404.25	-1523.14	237.77	0	0
OG0004338	-1404.16	-1551.35	294.387	0	0
OG0001091	-1403.6	-1548.79	290.375	0	0
OG0000166	-1402.68	-1573.82	342.288	0	0
OG0005132	-1402.29	-1531.11	257.631	0	0
OG0004680	-1402.01	-1530.59	257.163	0	0
OG0006104	-1401.25	-1509.74	216.986	0	0
OG0002841	-1400.49	-1514.32	227.654	0	0
OG0001241	-1400.27	-1541.25	281.95	0	0
OG0004197	-1399.26	-1524.75	250.988	0	0
OG0005997	-1399.12	-1538.05	277.871	0	0
OG0004796	-1398.76	-1559.66	321.806	0	0
OG0000072	-1398.26	-1497.92	199.31	0	0
OG0001693	-1397.16	-1518.55	242.769	0	0
OG0000130	-1395.14	-1596.53	402.768	0	0
OG0004685	-1394.33	-1492.29	195.921	0	0
OG0005975	-1393.83	-1551.85	316.032	0	0
OG0002323	-1393.54	-1503.91	220.74	0	0
OG0005940	-1391.49	-1547.84	312.703	0	0
OG0003494	-1391.25	-1526.22	269.936	0	0
OG0005607	-1391.18	-1523.8	265.243	0	0
OG0004517	-1391.18	-1511.1	239.852	0	0
OG0005507	-1386.53	-1498.7	224.331	0	0
OG0004125	-1386.47	-1529.18	285.421	0	0
OG0004278	-1381.89	-1540.64	317.492	0	0
OG0001968	-1380.95	-1553.35	344.811	0	0
OG0006075	-1380.88	-1554.61	347.446	0	0
OG0003115	-1378.55	-1540.18	323.263	0	0
OG0000247	-1377.83	-1507.66	259.668	0	0
OG0000923	-1377.59	-1514.75	274.313	0	0
OG0003769	-1376.35	-1510.89	269.087	0	0
OG0004654	-1375.81	-1474.48	197.352	0	0
OG0002111	-1373.78	-1492.72	237.866	0	0
OG0002862	-1373.71	-1503.44	259.471	0	0
OG0000284	-1372.77	-1511.09	276.628	0	0
OG0003557	-1372.66	-1445.14	144.962	0	0
OG0002988	-1372.15	-1485.13	225.957	0	0
OG0000095	-1371.56	-1547.21	351.318	0	0
OG0000187	-1370.77	-1558.96	376.369	0	0
OG0000100	-1370.37	-1543.01	345.283	0	0
OG0004289	-1365.21	-1511.08	291.749	0	0
OG0003886	-1365.04	-1532.29	334.504	0	0
OG0003357	-1365.01	-1491.86	253.7	0	0
OG0001052	-1364.47	-1552.67	376.414	0	0
OG0005942	-1363.49	-1525.94	324.882	0	0
OG0005440	-1362.94	-1533.6	341.304	0	0
OG0003944	-1362.62	-1489.17	253.097	0	0
OG0003435	-1362.33	-1512.45	300.255	0	0
OG0003113	-1362.24	-1492.51	260.549	0	0
OG0004675	-1361.36	-1509.22	295.712	0	0
OG0005171	-1360.75	-1480.06	238.619	0	0
OG0006275	-1358.98	-1477.91	237.844	0	0
OG0006313	-1357.43	-1531.34	347.81	0	0
OG0006313	-1357.43	-1531.34	347.81	0	0
OG0005073	-1357.42	-1513.34	311.847	0	0
OG0006252	-1357.08	-1483.77	253.373	0	0
OG0003451	-1355.4	-1522.59	334.365	0	0
OG0005309	-1354.99	-1470.91	231.838	0	0
OG0003926	-1354.52	-1488.47	267.909	0	0
OG0005491	-1353.8	-1497.15	286.698	0	0
OG0000075	-1353.09	-1490.89	275.594	0	0
OG0001548	-1352.53	-1472	238.936	0	0
OG0000282	-1350.33	-1465.06	229.458	0	0
OG0004856	-1347.61	-1460.95	226.683	0	0
OG0002891	-1346.81	-1466.24	238.852	0	0
OG0003323	-1346.61	-1478.41	263.595	0	0
OG0000339	-1346.32	-1501.14	309.657	0	0
OG0006042	-1345.72	-1518.23	345.03	0	0
OG0003888	-1344.95	-1503.77	317.657	0	0
OG0004850	-1344.5	-1493.98	298.958	0	0
OG0005916	-1344.28	-1464.22	239.874	0	0
OG0004316	-1342.43	-1464.26	243.671	0	0
OG0005408	-1342.03	-1513.16	342.254	0	0
OG0004390	-1340.98	-1445.53	209.101	0	0
OG0004610	-1340.85	-1449.37	217.034	0	0
OG0001777	-1338.3	-1454.18	231.769	0	0
OG0005291	-1336.19	-1493.22	314.073	0	0
OG0002070	-1335.4	-1467.44	264.086	0	0
OG0004630	-1335.38	-1489.92	309.073	0	0
OG0006360	-1335.26	-1486.58	302.648	0	0
OG0006360	-1335.26	-1486.58	302.648	0	0
OG0006328	-1335.21	-1479.97	289.523	0	0
OG0006328	-1335.21	-1479.97	289.523	0	0
OG0000485	-1335.11	-1477.18	284.135	0	0
OG0004722	-1334.87	-1447.8	225.864	0	0
OG0005800	-1334.47	-1491.5	314.046	0	0
OG0003569	-1333.86	-1468.8	269.889	0	0
OG0003953	-1332.54	-1460.32	255.554	0	0
OG0005353	-1331.36	-1514.88	367.034	0	0
OG0003237	-1330.17	-1448.01	235.695	0	0
OG0005649	-1329.56	-1465.99	272.872	0	0
OG0002970	-1329.41	-1520.89	382.965	0	0
OG0000812	-1325.98	-1454.18	256.404	0	0
OG0001946	-1325.61	-1410.4	169.58	0	0
OG0005354	-1325.52	-1435.12	219.205	0	0
OG0002996	-1324.96	-1431.67	213.42	0	0
OG0005944	-1324.05	-1448.87	249.648	0	0
OG0004778	-1323.9	-1433.35	218.913	0	0
OG0001369	-1323.88	-1476.06	304.357	0	0
OG0004593	-1323.52	-1478.92	310.794	0	0
OG0004925	-1323.34	-1450.68	254.691	0	0
OG0001751	-1322.4	-1454.3	263.78	0	0
OG0005399	-1320.19	-1441.71	243.04	0	0
OG0003576	-1319.7	-1427.71	216.016	0	0
OG0005652	-1319.49	-1474.25	309.528	0	0
OG0000049	-1318.55	-1405.81	174.506	0	0
OG0005360	-1318.07	-1439.75	243.357	0	0
OG0006050	-1317.76	-1460.01	284.515	0	0
OG0005247	-1316.46	-1448.97	265.009	0	0
OG0005589	-1314.05	-1383.58	139.074	0	0
OG0006357	-1313.1	-1393.8	161.388	0	0
OG0006357	-1313.1	-1393.8	161.388	0	0
OG0001950	-1312.21	-1444.03	263.646	0	0
OG0004400	-1311.43	-1467.73	312.598	0	0
OG0005067	-1310.92	-1439.32	256.803	0	0
OG0000428	-1310.6	-1487.19	353.187	0	0
OG0001479	-1309.79	-1485.19	350.8	0	0
OG0001923	-1309.52	-1441.09	263.135	0	0
OG0005196	-1309.24	-1468.23	317.985	0	0
OG0006363	-1308.24	-1457.55	298.614	0	0
OG0006363	-1308.24	-1457.55	298.614	0	0
OG0005315	-1305.55	-1438.6	266.103	0	0
OG0002388	-1305.24	-1453.75	297.017	0	0
OG0005774	-1305.14	-1446.64	282.994	0	0
OG0004900	-1304.05	-1429.5	250.904	0	0
OG0004844	-1303.89	-1498.4	389.026	0	0
OG0003705	-1303.53	-1405.97	204.883	0	0
OG0005386	-1303.1	-1404.81	203.405	0	0
OG0004435	-1303.03	-1386.58	167.108	0	0
OG0003567	-1302.85	-1432.57	259.452	0	0
OG0004051	-1302.03	-1426.46	248.853	0	0
OG0004620	-1301.96	-1457.11	310.304	0	0
OG0005140	-1298.08	-1425.35	254.528	0	0
OG0003083	-1296.76	-1431.74	269.969	0	0
OG0001494	-1295.9	-1423.57	255.348	0	0
OG0005903	-1295.88	-1403.03	214.289	0	0
OG0003936	-1295.42	-1421.17	251.493	0	0
OG0004107	-1295.17	-1380.95	171.573	0	0
OG0003075	-1295.04	-1393.16	196.241	0	0
OG0003434	-1293.49	-1433.46	279.959	0	0
OG0003903	-1293.06	-1435.66	285.204	0	0
OG0004870	-1292.84	-1408.01	230.342	0	0
OG0006351	-1292.78	-1409.11	232.657	0	0
OG0006351	-1292.78	-1409.11	232.657	0	0
OG0006380	-1291.72	-1396.23	209.024	0	0
OG0006380	-1291.72	-1396.23	209.024	0	0
OG0005313	-1291.56	-1407.52	231.905	0	0
OG0004099	-1291.55	-1414.85	246.589	0	0
OG0004352	-1290.69	-1385.51	189.641	0	0
OG0001403	-1289.06	-1388.92	199.709	0	0
OG0004898	-1288.98	-1392.93	207.913	0	0
OG0005294	-1288.12	-1420.98	265.707	0	0
OG0004178	-1286.79	-1440.87	308.155	0	0
OG0006069	-1286.07	-1406.34	240.549	0	0
OG0004455	-1282.91	-1454.27	342.735	0	0
OG0004127	-1279.83	-1391.23	222.802	0	0
OG0005908	-1279.54	-1411.08	263.071	0	0
OG0006172	-1279.06	-1397.74	237.362	0	0
OG0005863	-1278.92	-1393.52	229.206	0	0
OG0003631	-1277.19	-1358.01	161.642	0	0
OG0005588	-1276.26	-1411.88	271.238	0	0
OG0005447	-1276	-1395.58	239.151	0	0
OG0003546	-1275.89	-1398.98	246.196	0	0
OG0005659	-1275.36	-1342.84	134.964	0	0
OG0006196	-1275.06	-1382.07	214.028	0	0
OG0006024	-1273.43	-1386.97	227.084	0	0
OG0002906	-1273.41	-1356.97	167.11	0	0
OG0004666	-1269.77	-1359.35	179.147	0	0
OG0002531	-1267.81	-1389.52	243.415	0	0
OG0003553	-1267.34	-1357.57	180.452	0	0
OG0003130	-1266.44	-1374.43	215.99	0	0
OG0001965	-1265.67	-1365.06	198.778	0	0
OG0004879	-1265.49	-1357.75	184.514	0	0
OG0005268	-1265.49	-1333.83	136.679	0	0
OG0005226	-1265.42	-1460.91	390.98	0	0
OG0002394	-1264.96	-1409.74	289.559	0	0
OG0000022	-1264.88	-1402.18	274.6	0	0
OG0002417	-1264.6	-1390.52	251.842	0	0
OG0005887	-1264.38	-1395.26	261.753	0	0
OG0001881	-1262.56	-1395.38	265.631	0	0
OG0005553	-1261.35	-1380.86	239.032	0	0
OG0004085	-1260.55	-1376.53	231.961	0	0
OG0001345	-1260.35	-1356.73	192.774	0	0
OG0006327	-1259.77	-1398.31	277.081	0	0
OG0006327	-1259.77	-1398.31	277.081	0	0
OG0001750	-1259.1	-1379.23	240.264	0	0
OG0000999	-1257.38	-1384.3	253.845	0	0
OG0006282	-1257.08	-1404.65	295.134	0	0
OG0000088	-1256.72	-1400.33	287.228	0	0
OG0001588	-1256.55	-1386.66	260.22	0	0
OG0004426	-1256.45	-1362.22	211.542	0	0
OG0005193	-1255.96	-1370.12	228.324	0	0
OG0006278	-1255.28	-1397.03	283.491	0	0
OG0003250	-1255.26	-1345.11	179.694	0	0
OG0000361	-1253.01	-1383.73	261.436	0	0
OG0005055	-1252.88	-1389.42	273.086	0	0
OG0005934	-1252.28	-1391.75	278.946	0	0
OG0005328	-1249.68	-1330.18	161.011	0	0
OG0002224	-1247.01	-1360.04	226.056	0	0
OG0005274	-1246.96	-1373.72	253.511	0	0
OG0001941	-1246.69	-1361.01	228.64	0	0
OG0000430	-1245.44	-1333.2	175.521	0	0
OG0001274	-1245.25	-1356.69	222.885	0	0
OG0006301	-1245.07	-1391.21	292.282	0	0
OG0006197	-1243.55	-1407.39	327.662	0	0
OG0004663	-1243.17	-1336.55	186.769	0	0
OG0001639	-1241.77	-1410.22	336.888	0	0
OG0002364	-1241.5	-1354.05	225.087	0	0
OG0001740	-1241	-1370.12	258.242	0	0
OG0003038	-1240.08	-1361.16	242.169	0	0
OG0002333	-1239.77	-1318.56	157.593	0	0
OG0001503	-1238.7	-1344.13	210.857	0	0
OG0005617	-1238.07	-1337.08	198.02	0	0
OG0006099	-1237.98	-1362.4	248.837	0	0
OG0002518	-1237.24	-1356.56	238.637	0	0
OG0005531	-1235.12	-1380.15	290.049	0	0
OG0005530	-1233.7	-1354.29	241.173	0	0
OG0003171	-1233.68	-1333.09	198.811	0	0
OG0004293	-1233.14	-1362	257.714	0	0
OG0003571	-1232.29	-1347.88	231.179	0	0
OG0000846	-1230.39	-1352.84	244.895	0	0
OG0000736	-1230.23	-1325.08	189.701	0	0
OG0003326	-1228.73	-1371.55	285.646	0	0
OG0001760	-1226.59	-1303.56	153.947	0	0
OG0001312	-1225.96	-1350.69	249.462	0	0
OG0002612	-1225.76	-1375.51	299.509	0	0
OG0003371	-1225.65	-1360.62	269.945	0	0
OG0004576	-1225.43	-1331.06	211.261	0	0
OG0002170	-1224.4	-1337.69	226.575	0	0
OG0002593	-1224.36	-1334.36	220.001	0	0
OG0004617	-1222.95	-1389.02	332.126	0	0
OG0004298	-1220.57	-1294.39	147.633	0	0
OG0003031	-1219.96	-1312.95	185.97	0	0
OG0002848	-1219.7	-1350.36	261.328	0	0
OG0002153	-1216.91	-1282.57	131.315	0	0
OG0002496	-1216.33	-1331.64	230.614	0	0
OG0003666	-1216.17	-1354.01	275.689	0	0
OG0000083	-1216.12	-1356.12	279.991	0	0
OG0000190	-1215.18	-1327.12	223.875	0	0
OG0004417	-1214.84	-1319.39	209.103	0	0
OG0005610	-1214.51	-1312.57	196.112	0	0
OG0000347	-1214.05	-1343.2	258.304	0	0
OG0004652	-1212.78	-1312.15	198.748	0	0
OG0002750	-1211.94	-1335.25	246.624	0	0
OG0003684	-1211.89	-1277.87	131.96	0	0
OG0001080	-1210.45	-1282.39	143.896	0	0
OG0005987	-1209.99	-1366.18	312.376	0	0
OG0001879	-1208.73	-1325.49	233.526	0	0
OG0001658	-1206.35	-1341.64	270.587	0	0
OG0004243	-1203.9	-1332.7	257.593	0	0
OG0002076	-1203.01	-1329.85	253.68	0	0
OG0002861	-1202.59	-1313.8	222.418	0	0
OG0003796	-1202.25	-1296.34	188.182	0	0
OG0000142	-1200.74	-1295.17	188.856	0	0
OG0000152	-1200.27	-1304.41	208.28	0	0
OG0005715	-1200.04	-1336.17	272.276	0	0
OG0004893	-1199.06	-1343.45	288.775	0	0
OG0001107	-1198.5	-1307.27	217.527	0	0
OG0000412	-1194.87	-1257.84	125.936	0	0
OG0006065	-1194.79	-1323.06	256.534	0	0
OG0003870	-1194.77	-1287.21	184.871	0	0
OG0002976	-1194.5	-1314.38	239.758	0	0
OG0005474	-1194.25	-1309.75	231.005	0	0
OG0004317	-1193.83	-1301.97	216.296	0	0
OG0000873	-1193.81	-1343.52	299.414	0	0
OG0004282	-1193.5	-1253.47	119.93	0	0
OG0004659	-1193.05	-1307.44	228.773	0	0
OG0006116	-1192.38	-1320.51	256.265	0	0
OG0006161	-1191.33	-1309.38	236.095	0	0
OG0006366	-1190.82	-1309.16	236.672	0	0
OG0006366	-1190.82	-1309.16	236.672	0	0
OG0005913	-1190.36	-1279.96	179.191	0	0
OG0005322	-1189.96	-1323.47	267.02	0	0
OG0003645	-1189.53	-1286.71	194.348	0	0
OG0002214	-1189.11	-1321.72	265.213	0	0
OG0006206	-1188.66	-1295.55	213.771	0	0
OG0004692	-1188.09	-1346.55	316.93	0	0
OG0006246	-1186.81	-1310.93	248.246	0	0
OG0006319	-1186.05	-1300.75	229.411	0	0
OG0006319	-1186.05	-1300.75	229.411	0	0
OG0003438	-1185.94	-1343.46	315.043	0	0
OG0003993	-1184.44	-1322.02	275.158	0	0
OG0002909	-1182.85	-1338.11	310.526	0	0
OG0002541	-1182.58	-1342.3	319.437	0	0
OG0000309	-1180.91	-1318.92	276.003	0	0
OG0005292	-1180.56	-1277.1	193.083	0	0
OG0003008	-1180.53	-1258.62	156.172	0	0
OG0003882	-1177.93	-1265.8	175.73	0	0
OG0004518	-1177.68	-1298.22	241.092	0	0
OG0002941	-1177.59	-1239.59	123.993	0	0
OG0006358	-1177.5	-1257.26	159.505	0	0
OG0006358	-1177.5	-1257.26	159.505	0	0
OG0003868	-1175.84	-1312.05	272.43	0	0
OG0004253	-1175.41	-1271.54	192.265	0	0
OG0005152	-1175.35	-1321.59	292.483	0	0
OG0001432	-1174.37	-1299.95	251.167	0	0
OG0004442	-1174.14	-1295.54	242.797	0	0
OG0005719	-1173.39	-1289.79	232.802	0	0
OG0005261	-1173.02	-1266.31	186.581	0	0
OG0000421	-1172.12	-1342.32	340.406	0	0
OG0005842	-1170.96	-1294.35	246.783	0	0
OG0004431	-1170.46	-1262.24	183.565	0	0
OG0005537	-1169.07	-1310.37	282.583	0	0
OG0005769	-1169.01	-1298	257.976	0	0
OG0004174	-1168.17	-1279.72	223.102	0	0
OG0000668	-1167.56	-1281.93	228.736	0	0
OG0005834	-1167.47	-1318.16	301.387	0	0
OG0003532	-1165.17	-1259.07	187.801	0	0
OG0000579	-1164.43	-1282.43	235.993	0	0
OG0005450	-1164.33	-1299.58	270.51	0	0
OG0005396	-1164.05	-1285.08	242.066	0	0
OG0000757	-1162.62	-1293.85	262.465	0	0
OG0004589	-1161.95	-1310.22	296.536	0	0
OG0001513	-1159.39	-1264.12	209.452	0	0
OG0004738	-1158.49	-1263.01	209.04	0	0
OG0005876	-1157.25	-1246.44	178.377	0	0
OG0004748	-1155.31	-1257.89	205.158	0	0
OG0003777	-1155.19	-1280.69	250.991	0	0
OG0005897	-1155.05	-1231.78	153.469	0	0
OG0000575	-1155.02	-1332.66	355.272	0	0
OG0002923	-1153.33	-1202.88	99.0948	0	0
OG0005600	-1152.95	-1298.58	291.261	0	0
OG0004081	-1152.95	-1252.29	198.689	0	0
OG0005695	-1150.05	-1281.78	263.457	0	0
OG0001768	-1148.08	-1251.17	206.184	0	0
OG0003228	-1148.01	-1287.58	279.148	0	0
OG0003480	-1147.62	-1267.08	238.913	0	0
OG0001834	-1146.15	-1251.59	210.888	0	0
OG0005999	-1145.1	-1228.54	166.895	0	0
OG0006141	-1144.7	-1266.74	244.088	0	0
OG0005620	-1143.33	-1285.66	284.668	0	0
OG0004797	-1142.05	-1293.16	302.224	0	0
OG0002432	-1141.62	-1241.8	200.365	0	0
OG0004170	-1140.53	-1242.41	203.758	0	0
OG0002305	-1140.42	-1240.56	200.283	0	0
OG0005337	-1138.4	-1248.16	219.512	0	0
OG0004845	-1138.1	-1221.09	165.981	0	0
OG0006251	-1137.06	-1238.12	202.133	0	0
OG0004467	-1133.5	-1279.28	291.571	0	0
OG0005280	-1132.62	-1234.29	203.349	0	0
OG0004735	-1132.43	-1214.5	164.138	0	0
OG0006012	-1131.47	-1303.57	344.202	0	0
OG0001711	-1131.37	-1249.44	236.144	0	0
OG0001514	-1131.13	-1243.86	225.453	0	0
OG0002625	-1129.76	-1224.23	188.953	0	0
OG0001489	-1129.11	-1208.68	159.138	0	0
OG0006391	-1127.92	-1191.56	127.282	0	0
OG0006391	-1127.92	-1191.56	127.282	0	0
OG0004690	-1127.33	-1236.1	217.546	0	0
OG0003564	-1126.49	-1254.57	256.15	0	0
OG0004877	-1124.05	-1240.69	233.274	0	0
OG0000764	-1121.6	-1195.83	148.464	0	0
OG0001872	-1121.59	-1236.75	230.323	0	0
OG0004157	-1119.97	-1276.26	312.576	0	0
OG0006156	-1118.49	-1281.13	325.287	0	0
OG0004677	-1118.4	-1220.78	204.762	0	0
OG0003377	-1117.42	-1240.24	245.656	0	0
OG0001563	-1116.34	-1204.26	175.842	0	0
OG0002615	-1115.62	-1251.89	272.53	0	0
OG0004376	-1114.56	-1239.78	250.432	0	0
OG0000447	-1113.6	-1249.82	272.44	0	0
OG0004618	-1113.56	-1240.4	253.687	0	0
OG0003328	-1112.97	-1217.05	208.165	0	0
OG0000330	-1111.79	-1235.86	248.149	0	0
OG0005325	-1111.17	-1228.31	234.283	0	0
OG0000056	-1109.31	-1249.8	280.962	0	0
OG0000209	-1106.93	-1244.68	275.498	0	0
OG0006234	-1103.2	-1237.49	268.589	0	0
OG0004842	-1102.9	-1205.09	204.368	0	0
OG0002879	-1101.75	-1241.88	280.261	0	0
OG0001166	-1100.78	-1170.02	138.476	0	0
OG0004932	-1100.57	-1212.52	223.919	0	0
OG0004457	-1099.88	-1210.85	221.93	0	0
OG0002091	-1098.32	-1194.56	192.48	0	0
OG0003270	-1098.29	-1184.83	173.08	0	0
OG0003537	-1098.28	-1190.15	183.727	0	0
OG0004642	-1096.07	-1224.24	256.335	0	0
OG0000199	-1096.02	-1206.61	221.187	0	0
OG0004306	-1094.69	-1197.64	205.907	0	0
OG0002199	-1094.59	-1185.53	181.875	0	0
OG0000446	-1093.73	-1209.85	232.248	0	0
OG0002735	-1093.38	-1174.98	163.197	0	0
OG0003823	-1093.25	-1176.23	165.965	0	0
OG0006353	-1092.75	-1218.13	250.771	0	0
OG0006353	-1092.75	-1218.13	250.771	0	0
OG0000223	-1091.43	-1176.03	169.203	0	0
OG0005704	-1090.25	-1187.45	194.405	0	0
OG0005896	-1089.4	-1190.57	202.33	0	0
OG0006405	-1087.08	-1214.61	255.068	0	0
OG0006405	-1087.08	-1214.61	255.068	0	0
OG0002106	-1082.09	-1187.05	209.92	0	0
OG0003600	-1081.86	-1188.8	213.879	0	0
OG0005657	-1081.75	-1144.52	125.54	0	0
OG0002100	-1081.61	-1162.98	162.737	0	0
OG0003116	-1081.53	-1149.36	135.657	0	0
OG0000077	-1081.27	-1165.01	167.477	0	0
OG0004052	-1080.6	-1198.59	235.994	0	0
OG0002164	-1080.45	-1118.58	76.2753	0	0
OG0002585	-1080.4	-1189.17	217.539	0	0
OG0004798	-1080.26	-1245.69	330.874	0	0
OG0004555	-1077.58	-1165.74	176.322	0	0
OG0005891	-1076.2	-1220.49	288.582	0	0
OG0003865	-1075.27	-1194.55	238.564	0	0
OG0001016	-1074.34	-1213.16	277.63	0	0
OG0001742	-1074.18	-1219.45	290.541	0	0
OG0001248	-1073.88	-1189.7	231.645	0	0
OG0001621	-1073.78	-1161.31	175.06	0	0
OG0003158	-1072.7	-1176.16	206.915	0	0
OG0000921	-1071.21	-1177.6	212.767	0	0
OG0003402	-1070.86	-1160.42	179.119	0	0
OG0001375	-1069.62	-1162.62	186.007	0	0
OG0005380	-1067.79	-1168.29	201.012	0	0
OG0004688	-1067.74	-1146.11	156.727	0	0
OG0006286	-1067.58	-1188.02	240.87	0	0
OG0003906	-1066.66	-1142.87	152.413	0	0
OG0003577	-1066.08	-1173.81	215.468	0	0
OG0005468	-1060.68	-1191.39	261.419	0	0
OG0001843	-1060.63	-1141.47	161.674	0	0
OG0003112	-1060.56	-1151.28	181.423	0	0
OG0004804	-1059.84	-1155.42	191.16	0	0
OG0000565	-1058.9	-1157.54	197.284	0	0
OG0002485	-1057.85	-1147.34	178.969	0	0
OG0006014	-1056.98	-1158.92	203.872	0	0
OG0006249	-1054.68	-1142.71	176.055	0	0
OG0004548	-1054.59	-1123.88	138.577	0	0
OG0002407	-1054.32	-1126.48	144.32	0	0
OG0002428	-1053.18	-1143.41	180.459	0	0
OG0004708	-1051.71	-1140.35	177.284	0	0
OG0000102	-1050.67	-1165.21	229.081	0	0
OG0001974	-1050.42	-1166.33	231.828	0	0
OG0000263	-1049.84	-1189.71	279.744	0	0
OG0003349	-1048.94	-1166.33	234.781	0	0
OG0000517	-1048.14	-1153.73	211.192	0	0
OG0003988	-1047.89	-1166.19	236.59	0	0
OG0001765	-1047.46	-1199.83	304.745	0	0
OG0004249	-1046.96	-1124.14	154.348	0	0
OG0003363	-1046.76	-1143.16	192.797	0	0
OG0004233	-1046.34	-1140.43	188.18	0	0
OG0004782	-1046.26	-1126.25	159.973	0	0
OG0002222	-1046.25	-1153.15	213.788	0	0
OG0004228	-1044.75	-1158.78	228.052	0	0
OG0006384	-1043.73	-1115.76	144.076	0	0
OG0006384	-1043.73	-1115.76	144.076	0	0
OG0000470	-1042.57	-1149.02	212.899	0	0
OG0004631	-1042.4	-1121.19	157.578	0	0
OG0004397	-1042.08	-1131.32	178.481	0	0
OG0005388	-1042.04	-1131.79	179.499	0	0
OG0001692	-1041.06	-1139.46	196.798	0	0
OG0001477	-1041.04	-1073.7	65.3173	0	0
OG0003708	-1039.97	-1135.2	190.447	0	0
OG0001140	-1038.98	-1111.95	145.955	0	0
OG0002325	-1037.57	-1126.47	177.798	0	0
OG0001458	-1037.35	-1141.87	209.04	0	0
OG0004490	-1036.09	-1141.63	211.085	0	0
OG0005604	-1035.8	-1166.44	261.296	0	0
OG0002791	-1035.18	-1135.22	200.081	0	0
OG0000616	-1034.48	-1086.95	104.956	0	0
OG0006090	-1034.31	-1100	131.375	0	0
OG0005377	-1033.87	-1110.68	153.621	0	0
OG0005496	-1033.19	-1133.51	200.645	0	0
OG0005475	-1032.28	-1096.85	129.148	0	0
OG0004909	-1030.29	-1080.96	101.33	0	0
OG0003773	-1030.16	-1143.94	227.573	0	0
OG0004765	-1029.96	-1135.08	210.254	0	0
OG0006343	-1028.8	-1147.08	236.561	0	0
OG0006343	-1028.8	-1147.08	236.561	0	0
OG0002938	-1028.57	-1132.58	208.023	0	0
OG0001464	-1028.31	-1099.97	143.323	0	0
OG0002949	-1025.31	-1069.73	88.8442	0	0
OG0003415	-1025.09	-1111.72	173.267	0	0
OG0005806	-1022.89	-1072.46	99.1421	0	0
OG0003838	-1022.57	-1106.36	167.575	0	0
OG0003034	-1020.97	-1113.81	185.67	0	0
OG0003105	-1019.98	-1124.73	209.511	0	0
OG0005894	-1019.71	-1127.49	215.542	0	0
OG0000285	-1019.19	-1098.78	159.167	0	0
OG0003156	-1019.07	-1085.38	132.625	0	0
OG0003757	-1019.05	-1133.83	229.569	0	0
OG0001397	-1018.74	-1098.39	159.29	0	0
OG0005768	-1018.47	-1134.15	231.356	0	0
OG0002438	-1018.47	-1101.84	166.745	0	0
OG0004623	-1018.34	-1091.23	145.773	0	0
OG0005216	-1018.08	-1136.66	237.158	0	0
OG0004413	-1013.24	-1110.29	194.096	0	0
OG0005631	-1013.15	-1131.31	236.313	0	0
OG0005243	-1012.95	-1149.27	272.642	0	0
OG0003880	-1009.68	-1133.69	248.021	0	0
OG0002119	-1009.02	-1101.6	185.168	0	0
OG0003555	-1008.7	-1100.35	183.302	0	0
OG0003489	-1007.79	-1094.91	174.237	0	0
OG0001804	-1007.04	-1062.65	111.215	0	0
OG0000512	-1006.9	-1098.6	183.402	0	0
OG0002587	-1005.77	-1085.45	159.347	0	0
OG0003673	-1005.35	-1089.72	168.737	0	0
OG0002956	-1003.89	-1130.33	252.878	0	0
OG0001265	-1003.71	-1085.98	164.535	0	0
OG0003990	-1002.62	-1068.74	132.238	0	0
OG0002346	-1002.29	-1118.87	233.158	0	0
OG0003071	-1001.4	-1103.48	204.15	0	0
OG0005955	-1001.28	-1090.19	177.816	0	0
OG0005885	-1001.2	-1112.89	223.374	0	0
OG0002534	-1001.14	-1122.17	242.075	0	0
OG0002681	-998.774	-1112.9	228.25	0	0
OG0005365	-998.375	-1109.56	222.376	0	0
OG0002329	-998.16	-1098.12	199.919	0	0
OG0000167	-997.371	-1088.38	182.011	0	0
OG0004545	-995.807	-1127.45	263.287	0	0
OG0005886	-995.157	-1096.22	202.132	0	0
OG0004777	-994.305	-1132.66	276.707	0	0
OG0006022	-993.945	-1094.31	200.736	0	0
OG0002890	-992.404	-1094.71	204.605	0	0
OG0002189	-992.095	-1111.91	239.631	0	0
OG0004206	-989.739	-1093.88	208.281	0	0
OG0001537	-987.322	-1085.1	195.552	0	0
OG0004671	-986.947	-1064.6	155.298	0	0
OG0005334	-985.543	-1083.1	195.122	0	0
OG0002502	-985.198	-1013.8	57.1951	0	0
OG0002287	-984.456	-1080.62	192.318	0	0
OG0002220	-983.606	-1101.17	235.123	0	0
OG0002367	-983.584	-1090.67	214.179	0	0
OG0003727	-982.87	-1087.52	209.306	0	0
OG0003226	-981.944	-1071.18	178.464	0	0
OG0006215	-980.532	-1101.33	241.603	0	0
OG0004498	-979.615	-1108.71	258.192	0	0
OG0001511	-978.641	-1072.51	187.734	0	0
OG0003558	-978.437	-1093.47	230.072	0	0
OG0001951	-978.156	-1087.97	219.635	0	0
OG0001399	-976.977	-1051.79	149.625	0	0
OG0000426	-976.758	-1049.77	146.035	0	0
OG0006160	-975.895	-1083.72	215.65	0	0
OG0000750	-975.537	-1020.99	90.9044	0	0
OG0000340	-974.547	-1072.23	195.369	0	0
OG0002961	-973.867	-1113.19	278.647	0	0
OG0001104	-972.272	-1071.19	197.837	0	0
OG0003595	-972.128	-1057.04	169.819	0	0
OG0002832	-971.372	-1054.97	167.196	0	0
OG0002471	-969.283	-1013.54	88.5153	0	0
OG0004059	-968.91	-1070.35	202.873	0	0
OG0003336	-967.912	-1044.32	152.809	0	0
OG0005528	-966.296	-1083.25	233.914	0	0
OG0004847	-966.165	-1072.68	213.029	0	0
OG0005810	-964.512	-1091.62	254.207	0	0
OG0003080	-963.407	-1042.21	157.608	0	0
OG0002866	-963.364	-1023.77	120.818	0	0
OG0005571	-960.199	-1069.78	219.166	0	0
OG0004057	-959.543	-1037.3	155.521	0	0
OG0004843	-958.328	-1085.9	255.145	0	0
OG0001992	-958.004	-1063.71	211.408	0	0
OG0003170	-957.83	-1045.12	174.572	0	0
OG0004762	-956.493	-1022.29	131.592	0	0
OG0002139	-956.226	-1041.26	170.058	0	0
OG0001263	-956.109	-1021.7	131.188	0	0
OG0002648	-955.947	-1058.6	205.308	0	0
OG0001807	-955.857	-1079.65	247.587	0	0
OG0002464	-955.299	-1043.49	176.386	0	0
OG0000114	-954.542	-1026.35	143.617	0	0
OG0006000	-953.057	-1042.02	177.93	0	0
OG0004168	-952.589	-1061.47	217.767	0	0
OG0001315	-951.96	-1072.49	241.051	0	0
OG0000025	-951.651	-981.636	59.9692	0	0
OG0003719	-950.093	-1029.88	159.565	0	0
OG0006338	-948.994	-1043.58	189.173	0	0
OG0006338	-948.994	-1043.58	189.173	0	0
OG0001931	-947.274	-1035.71	176.881	0	0
OG0003199	-947.097	-1038.82	183.449	0	0
OG0000557	-945.908	-1038.77	185.731	0	0
OG0001467	-945.622	-1019.68	148.107	0	0
OG0006332	-945.523	-1060.17	229.301	0	0
OG0006332	-945.523	-1060.17	229.301	0	0
OG0001767	-944.336	-1059.6	230.522	0	0
OG0006113	-944.179	-1043.46	198.567	0	0
OG0002156	-944.003	-1051.59	215.181	0	0
OG0005177	-943.19	-1025.82	165.253	0	0
OG0005865	-943.021	-1055.91	225.778	0	0
OG0004377	-942.982	-1028.5	171.038	0	0
OG0004614	-942.905	-1020.02	154.239	0	0
OG0000181	-942.673	-1069.01	252.672	0	0
OG0003505	-942.507	-1059.61	234.201	0	0
OG0000417	-942.437	-1047.07	209.265	0	0
OG0004394	-941.803	-1029.7	175.787	0	0
OG0001553	-941.178	-1010.45	138.542	0	0
OG0003668	-941.049	-1013.75	145.398	0	0
OG0004162	-940.842	-1014.44	147.196	0	0
OG0004211	-939.981	-1019.38	158.79	0	0
OG0000884	-937.875	-1052.22	228.688	0	0
OG0004493	-936.236	-1009.98	147.496	0	0
OG0001641	-936.021	-1050.16	228.271	0	0
OG0004886	-935.048	-1027.23	184.371	0	0
OG0003403	-935.034	-1010.14	150.205	0	0
OG0004645	-935.001	-1040.97	211.945	0	0
OG0001476	-934.113	-1055.11	241.986	0	0
OG0006224	-932.631	-996.145	127.028	0	0
OG0005471	-930.127	-1011.4	162.546	0	0
OG0001092	-929.988	-976.002	92.027	0	0
OG0002218	-928.93	-1050.76	243.652	0	0
[truncated: 1,033 more rows]

## Sheet: Table S8
ID	Lnl1	Lnl2	LRT	P_value	P_adjust
OG0001269	-2458.16	-2410.93	94.4537	0	0
OG0001131	-2018.5	-1989.27	58.4636	0	0
OG0000282	-1326.77	-1350.33	47.1302	0	0
OG0000454	-6573.66	-6556.07	35.1871	3e-09	2.78625e-06
OG0000905	-3667.08	-3679.69	25.2055	5.15e-07	0.00034178
OG0000455	-2244.23	-2231.7	25.0714	5.52e-07	0.00034178
OG0000467	-938.763	-926.433	24.6594	6.84e-07	0.000363009
OG0002476	-609.998	-621.243	22.4912	2.111e-06	0.000980296
OG0000152	-1200.27	-1189.84	20.869	4.918e-06	0.00187682
OG0000575	-1166.11	-1155.7	20.8173	5.052e-06	0.00187682
OG0000591	-2696.13	-2705.26	18.2617	1.9254e-05	0.00608176
OG0000836	-2181.42	-2172.31	18.2234	1.9645e-05	0.00608176
OG0000199	-1096.02	-1103.75	15.4659	8.4009e-05	0.0240072
